# Supplementary material
Source: MDPI journal article supplement (https://www.mdpi.com/2226-471X/8/1/78)

# Exploring the Onset of Phonetic Drift in Voice Onset Time Perception

Additional model outputs and graphs

Dataset in Open Science Framework (OSF) [[url-redacted-for-review](#)]

This document provides supplementary model outputs and graphs showing by-participant results that were not included in the article.

## I. Model outputs

**Table A2.** Fixed-effect coefficients in Model 2 of voiceless identifications (HeardVoiceless). Model formula: HeardVoiceless ~ Exposure \* Condition \* Recency + (1 | Participant). Exposure is coded as continuous and centered, including exposures 1–9 only. Condition is coded as categorical, with four alternate reference levels (a–d). Recency is coded as categorical (reference level = pre-test). Significant effects ( $p < 0.05$ ) are bolded.

a) Condition 1 (crosslinguistic mapping) as reference level:

|                                              | $\beta$       | $SE$         | $z$ -value    | $p$ -value   |
|----------------------------------------------|---------------|--------------|---------------|--------------|
| (Intercept)                                  | 0.473         | 0.052        | 9.012         | < 0.001      |
| Exposure                                     | -0.008        | 0.008        | -0.970        | 0.332        |
| Condition: 2                                 | -0.141        | 0.081        | -1.746        | 0.081        |
| Condition: 3                                 | -0.092        | 0.086        | -1.077        | 0.281        |
| Condition: 4                                 | -0.049        | 0.072        | -0.684        | 0.494        |
| Recency: post-test                           | -0.030        | 0.030        | -1.007        | 0.314        |
| Exposure × Condition: 2                      | -0.017        | 0.012        | -1.355        | 0.175        |
| Exposure × Condition: 3                      | -0.019        | 0.013        | -1.473        | 0.141        |
| Exposure × Condition: 4                      | -0.013        | 0.011        | -1.158        | 0.247        |
| Exposure × Recency: post-test                | -0.010        | 0.011        | -0.902        | 0.367        |
| Condition: 2 × Recency: post-test            | 0.007         | 0.045        | 0.161         | 0.872        |
| Condition: 3 × Recency: post-test            | 0.039         | 0.048        | 0.803         | 0.422        |
| <b>Condition: 4 × Recency: post-test</b>     | <b>-0.096</b> | <b>0.040</b> | <b>-2.384</b> | <b>0.017</b> |
| Exposure × Condition: 2 × Recency: post-test | 0.010         | 0.017        | 0.560         | 0.576        |
| Exposure × Condition: 3 × Recency: post-test | 0.014         | 0.019        | 0.750         | 0.454        |
| Exposure × Condition: 4 × Recency: post-test | 0.010         | 0.016        | 0.670         | 0.503        |

b) Condition 2 (emotion identification) as reference level:

|                 | $\beta$       | $SE$         | $z$ -value    | $p$ -value   |
|-----------------|---------------|--------------|---------------|--------------|
| (Intercept)     | 0.332         | 0.061        | 5.430         | < 0.001      |
| <b>Exposure</b> | <b>-0.025</b> | <b>0.009</b> | <b>-2.633</b> | <b>0.008</b> |
| Condition: 1    | 0.141         | 0.080        | 1.747         | 0.081        |
| Condition: 3    | 0.048         | 0.091        | 0.531         | 0.595        |
| Condition: 4    | 0.091         | 0.079        | 1.164         | 0.244        |

|                                              |               |              |               |              |
|----------------------------------------------|---------------|--------------|---------------|--------------|
| Recency: post-test                           | -0.022        | 0.034        | -0.659        | 0.510        |
| Exposure × Condition: 1                      | 0.017         | 0.012        | 1.356         | 0.175        |
| Exposure × Condition: 3                      | -0.003        | 0.014        | -0.187        | 0.852        |
| Exposure × Condition: 4                      | 0.004         | 0.012        | 0.325         | 0.745        |
| Exposure × Recency: post-test                | -0.001        | 0.013        | -0.040        | 0.968        |
| Condition: 1 × Recency: post-test            | -0.007        | 0.045        | -0.161        | 0.872        |
| Condition: 3 × Recency: post-test            | 0.031         | 0.051        | 0.614         | 0.539        |
| <b>Condition: 4 × Recency: post-test</b>     | <b>-0.104</b> | <b>0.044</b> | <b>-2.363</b> | <b>0.018</b> |
| Exposure × Condition: 1 × Recency: post-test | -0.010        | 0.017        | -0.560        | 0.575        |
| Exposure × Condition: 3 × Recency: post-test | 0.004         | 0.020        | 0.211         | 0.833        |
| Exposure × Condition: 4 × Recency: post-test | 0.001         | 0.017        | 0.041         | 0.967        |

c) Condition 3 (unrelated task) as reference level:

|                                              | $\beta$       | <i>SE</i>    | <i>z-value</i> | <i>p-value</i> |
|----------------------------------------------|---------------|--------------|----------------|----------------|
| (Intercept)                                  | 0.380         | 0.068        | 5.616          | < 0.001        |
| <b>Exposure</b>                              | <b>-0.027</b> | <b>0.010</b> | <b>-2.624</b>  | <b>0.009</b>   |
| Condition: 1                                 | 0.092         | 0.086        | 1.075          | 0.282          |
| Condition: 2                                 | -0.048        | 0.091        | -0.532         | 0.595          |
| Condition: 4                                 | 0.043         | 0.084        | 0.513          | 0.608          |
| Recency: post-test                           | 0.009         | 0.038        | 0.233          | 0.816          |
| Exposure × Condition: 1                      | 0.019         | 0.013        | 1.472          | 0.141          |
| Exposure × Condition: 2                      | 0.003         | 0.014        | 0.187          | 0.852          |
| Exposure × Condition: 4                      | 0.007         | 0.013        | 0.507          | 0.612          |
| Exposure × Recency: post-test                | 0.004         | 0.015        | 0.247          | 0.805          |
| Condition: 1 × Recency: post-test            | -0.039        | 0.048        | -0.802         | 0.422          |
| Condition: 2 × Recency: post-test            | -0.031        | 0.051        | -0.614         | 0.539          |
| <b>Condition: 4 × Recency: post-test</b>     | <b>-0.135</b> | <b>0.047</b> | <b>-2.877</b>  | <b>0.004</b>   |
| Exposure × Condition: 1 × Recency: post-test | -0.014        | 0.019        | -0.749         | 0.454          |
| Exposure × Condition: 2 × Recency: post-test | -0.004        | 0.020        | -0.210         | 0.834          |
| Exposure × Condition: 4 × Recency: post-test | -0.003        | 0.018        | -0.190         | 0.849          |

d) Condition 4 (active control) as reference level:

|                                              | $\beta$       | <i>SE</i>    | <i>z-value</i> | <i>p-value</i>    |
|----------------------------------------------|---------------|--------------|----------------|-------------------|
| (Intercept)                                  | 0.423         | 0.049        | 8.599          | < 0.001           |
| <b>Exposure</b>                              | <b>-0.021</b> | <b>0.008</b> | <b>-2.728</b>  | <b>0.006</b>      |
| Condition: 1                                 | 0.049         | 0.072        | 0.684          | 0.494             |
| Condition: 2                                 | -0.091        | 0.078        | -1.165         | 0.244             |
| Condition: 3                                 | -0.043        | 0.084        | -0.514         | 0.607             |
| <b>Recency: post-test</b>                    | <b>-0.126</b> | <b>0.028</b> | <b>-4.573</b>  | <b>&lt; 0.001</b> |
| Exposure × Condition: 1                      | 0.013         | 0.011        | 1.158          | 0.247             |
| Exposure × Condition: 2                      | -0.004        | 0.012        | -0.325         | 0.745             |
| Exposure × Condition: 3                      | -0.007        | 0.013        | -0.508         | 0.612             |
| Exposure × Recency: post-test                | 1e-04         | 0.011        | 0.016          | 0.987             |
| <b>Condition: 1 × Recency: post-test</b>     | <b>0.096</b>  | <b>0.040</b> | <b>2.385</b>   | <b>0.017</b>      |
| <b>Condition: 2 × Recency: post-test</b>     | <b>0.104</b>  | <b>0.044</b> | <b>2.362</b>   | <b>0.018</b>      |
| <b>Condition: 3 × Recency: post-test</b>     | <b>0.135</b>  | <b>0.047</b> | <b>2.879</b>   | <b>0.004</b>      |
| Exposure × Condition: 1 × Recency: post-test | -0.010        | 0.016        | -0.670         | 0.503             |
| Exposure × Condition: 2 × Recency: post-test | -0.001        | 0.017        | -0.041         | 0.967             |
| Exposure × Condition: 3 × Recency: post-test | 0.003         | 0.018        | 0.191          | 0.849             |

**Table A3.** Fixed-effect coefficients in Model 2' of voiceless identifications (HeardVoiceless). Model formula: HeardVoiceless ~ Exposure \* Condition \* Recency + (1 | Participant). Exposure is coded as continuous and centered, including exposures 1–9 only. Condition is coded as categorical, with two levels (1–3, i.e. all FL exposure task conditions; 4, i.e. active control = reference level). Recency is coded as categorical (reference level = pre-test). Significant effects ( $p < 0.05$ ) are bolded.

|                                              | $\beta$       | SE           | z-value       | p-value           |
|----------------------------------------------|---------------|--------------|---------------|-------------------|
| (Intercept)                                  | 0.405         | 0.035        | 11.468        | < 0.001           |
| <b>Exposure</b>                              | <b>-0.018</b> | <b>0.005</b> | <b>-3.450</b> | <b>&lt; 0.001</b> |
| Condition: 4                                 | 0.019         | 0.062        | 0.305         | 0.760             |
| Recency: post-test                           | -0.017        | 0.019        | -0.908        | 0.364             |
| Exposure × Condition: 4                      | -0.003        | 0.009        | -0.273        | 0.785             |
| Exposure × Recency: post-test                | -0.004        | 0.007        | -0.483        | 0.629             |
| <b>Condition: 4 × Recency: post-test</b>     | <b>-0.109</b> | <b>0.034</b> | <b>-3.231</b> | <b>0.001</b>      |
| Exposure × Condition: 4 × Recency: post-test | 0.004         | 0.013        | 0.290         | 0.772             |

**Table A4.** Fixed-effect coefficients in Model 3 of voiceless identifications (HeardVoiceless). Model formula: HeardVoiceless ~ Exposure \* Condition + (1 | Participant). **Exposure is coded as categorical** (reference level = 0/baseline) to allow for comparisons of every exposure to the baseline, and Condition as categorical (reference level = 4/active control). Significant effects ( $p < 0.05$ ) are bolded.

|                            | $\beta$       | SE           | z-value       | p-value           |
|----------------------------|---------------|--------------|---------------|-------------------|
| (Intercept)                | 0.630         | 0.074        | 8.536         | < 0.001           |
| Exposure: 1                | -0.120        | 0.072        | -1.661        | 0.097             |
| <b>Exposure: 2</b>         | <b>-0.227</b> | <b>0.072</b> | <b>-3.154</b> | <b>0.002</b>      |
| <b>Exposure: 3</b>         | <b>-0.284</b> | <b>0.072</b> | <b>-3.938</b> | <b>&lt; 0.001</b> |
| <b>Exposure: 4</b>         | <b>-0.252</b> | <b>0.072</b> | <b>-3.489</b> | <b>&lt; 0.001</b> |
| <b>Exposure: 5</b>         | <b>-0.294</b> | <b>0.072</b> | <b>-4.075</b> | <b>&lt; 0.001</b> |
| <b>Exposure: 6</b>         | <b>-0.272</b> | <b>0.072</b> | <b>-3.768</b> | <b>&lt; 0.001</b> |
| <b>Exposure: 7</b>         | <b>-0.326</b> | <b>0.072</b> | <b>-4.535</b> | <b>&lt; 0.001</b> |
| <b>Exposure: 8</b>         | <b>-0.333</b> | <b>0.072</b> | <b>-4.630</b> | <b>&lt; 0.001</b> |
| <b>Exposure: 9</b>         | <b>-0.325</b> | <b>0.072</b> | <b>-4.513</b> | <b>&lt; 0.001</b> |
| <b>Exposure: 10</b>        | <b>-0.382</b> | <b>0.082</b> | <b>-4.631</b> | <b>&lt; 0.001</b> |
| Condition: 1               | 0.076         | 0.109        | 0.697         | 0.486             |
| Condition: 2               | -0.011        | 0.119        | -0.092        | 0.927             |
| Condition: 3               | -0.042        | 0.126        | -0.333        | 0.739             |
| Exposure: 1 × Condition: 1 | -0.019        | 0.107        | -0.182        | 0.856             |
| Exposure: 2 × Condition: 1 | 0.014         | 0.106        | 0.131         | 0.896             |
| Exposure: 3 × Condition: 1 | 0.063         | 0.106        | 0.588         | 0.557             |
| Exposure: 4 × Condition: 1 | -0.029        | 0.106        | -0.274        | 0.784             |
| Exposure: 5 × Condition: 1 | 0.027         | 0.106        | 0.249         | 0.803             |
| Exposure: 6 × Condition: 1 | -0.041        | 0.106        | -0.386        | 0.700             |
| Exposure: 7 × Condition: 1 | 0.049         | 0.106        | 0.460         | 0.645             |
| Exposure: 8 × Condition: 1 | 0.081         | 0.106        | 0.764         | 0.445             |
| Exposure: 9 × Condition: 1 | 0.054         | 0.106        | 0.505         | 0.614             |

|                             |        |       |        |       |
|-----------------------------|--------|-------|--------|-------|
| Exposure: 10 × Condition: 1 | 0.014  | 0.121 | 0.113  | 0.910 |
| Exposure: 1 × Condition: 2  | -0.030 | 0.117 | -0.260 | 0.795 |
| Exposure: 2 × Condition: 2  | -0.008 | 0.116 | -0.073 | 0.942 |
| Exposure: 3 × Condition: 2  | 0.035  | 0.116 | 0.299  | 0.765 |
| Exposure: 4 × Condition: 2  | -0.052 | 0.116 | -0.448 | 0.654 |
| Exposure: 5 × Condition: 2  | -0.032 | 0.116 | -0.278 | 0.781 |
| Exposure: 6 × Condition: 2  | -0.074 | 0.116 | -0.637 | 0.524 |
| Exposure: 7 × Condition: 2  | -0.014 | 0.116 | -0.119 | 0.905 |
| Exposure: 8 × Condition: 2  | -0.036 | 0.116 | -0.310 | 0.757 |
| Exposure: 9 × Condition: 2  | -0.044 | 0.116 | -0.379 | 0.704 |
| Exposure: 10 × Condition: 2 | -0.049 | 0.133 | -0.371 | 0.710 |
| Exposure: 1 × Condition: 3  | 0.037  | 0.124 | 0.296  | 0.768 |
| Exposure: 2 × Condition: 3  | 0.065  | 0.124 | 0.527  | 0.598 |
| Exposure: 3 × Condition: 3  | 0.130  | 0.124 | 1.053  | 0.292 |
| Exposure: 4 × Condition: 3  | 0.080  | 0.124 | 0.647  | 0.518 |
| Exposure: 5 × Condition: 3  | 0.099  | 0.124 | 0.802  | 0.423 |
| Exposure: 6 × Condition: 3  | 0.049  | 0.124 | 0.398  | 0.690 |
| Exposure: 7 × Condition: 3  | 0.079  | 0.123 | 0.639  | 0.523 |
| Exposure: 8 × Condition: 3  | 0.055  | 0.123 | 0.448  | 0.654 |
| Exposure: 9 × Condition: 3  | 0.007  | 0.123 | 0.055  | 0.956 |
| Exposure: 10 × Condition: 3 | 0.088  | 0.141 | 0.623  | 0.533 |

---

## II. Graphs

**Figure A1.** Percentages of voiceless identifications (HeardVoiceless) in Condition 1 (crosslinguistic mapping), by number of exposures and participant. Points represent an individual participant's percentage of voiceless identifications at the given number of exposures.

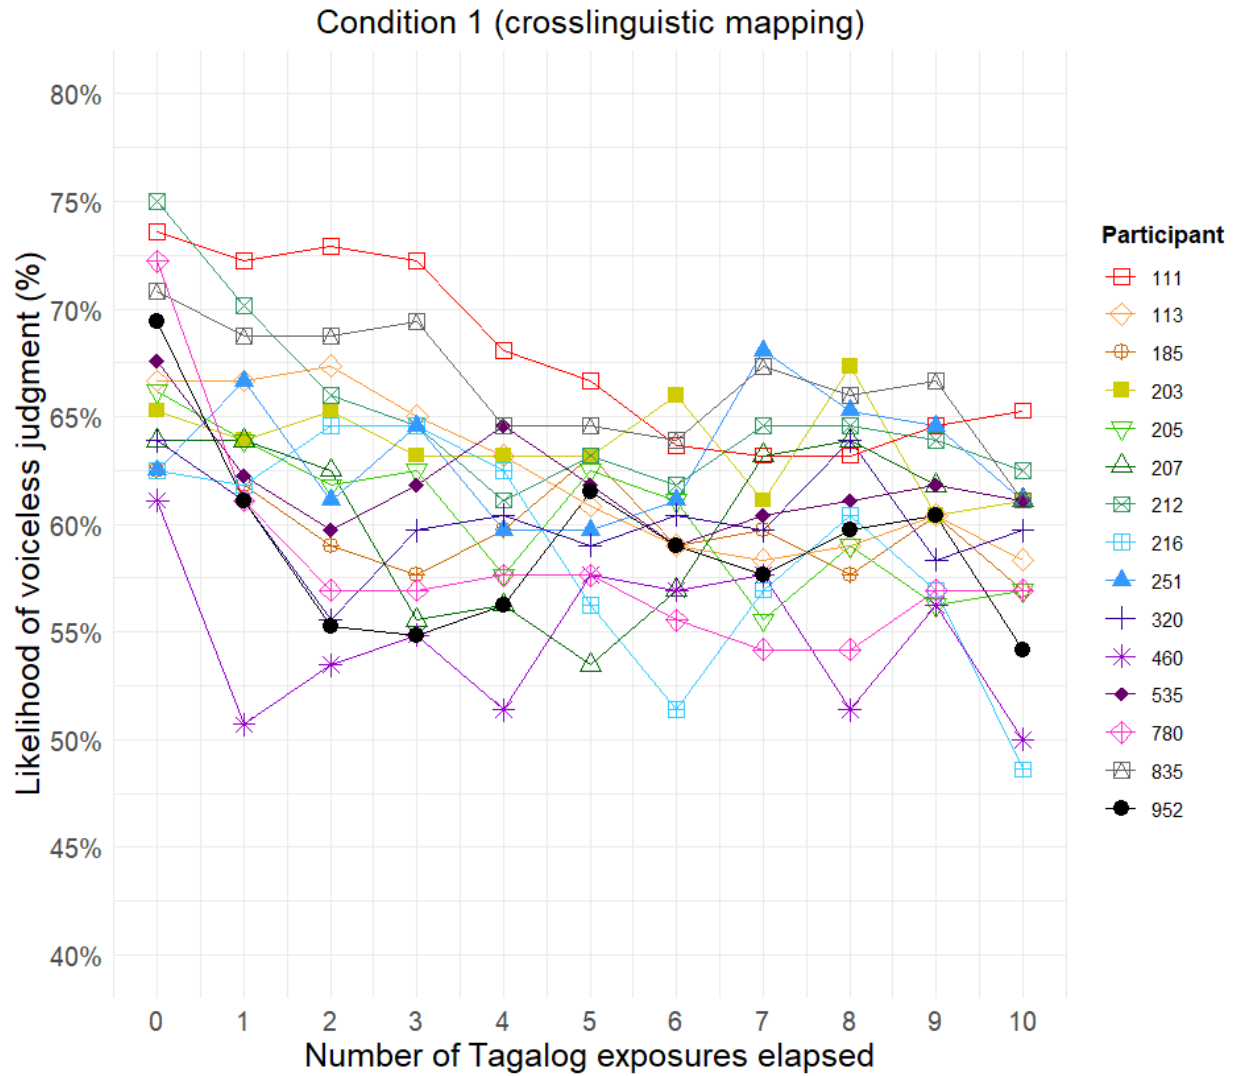

**Figure A2.** Percentages of voiceless identifications (HeardVoiceless) in Condition 2 (emotion identification), by number of exposures and participant. Points represent an individual participant's percentage of voiceless identifications at the given number of exposures.

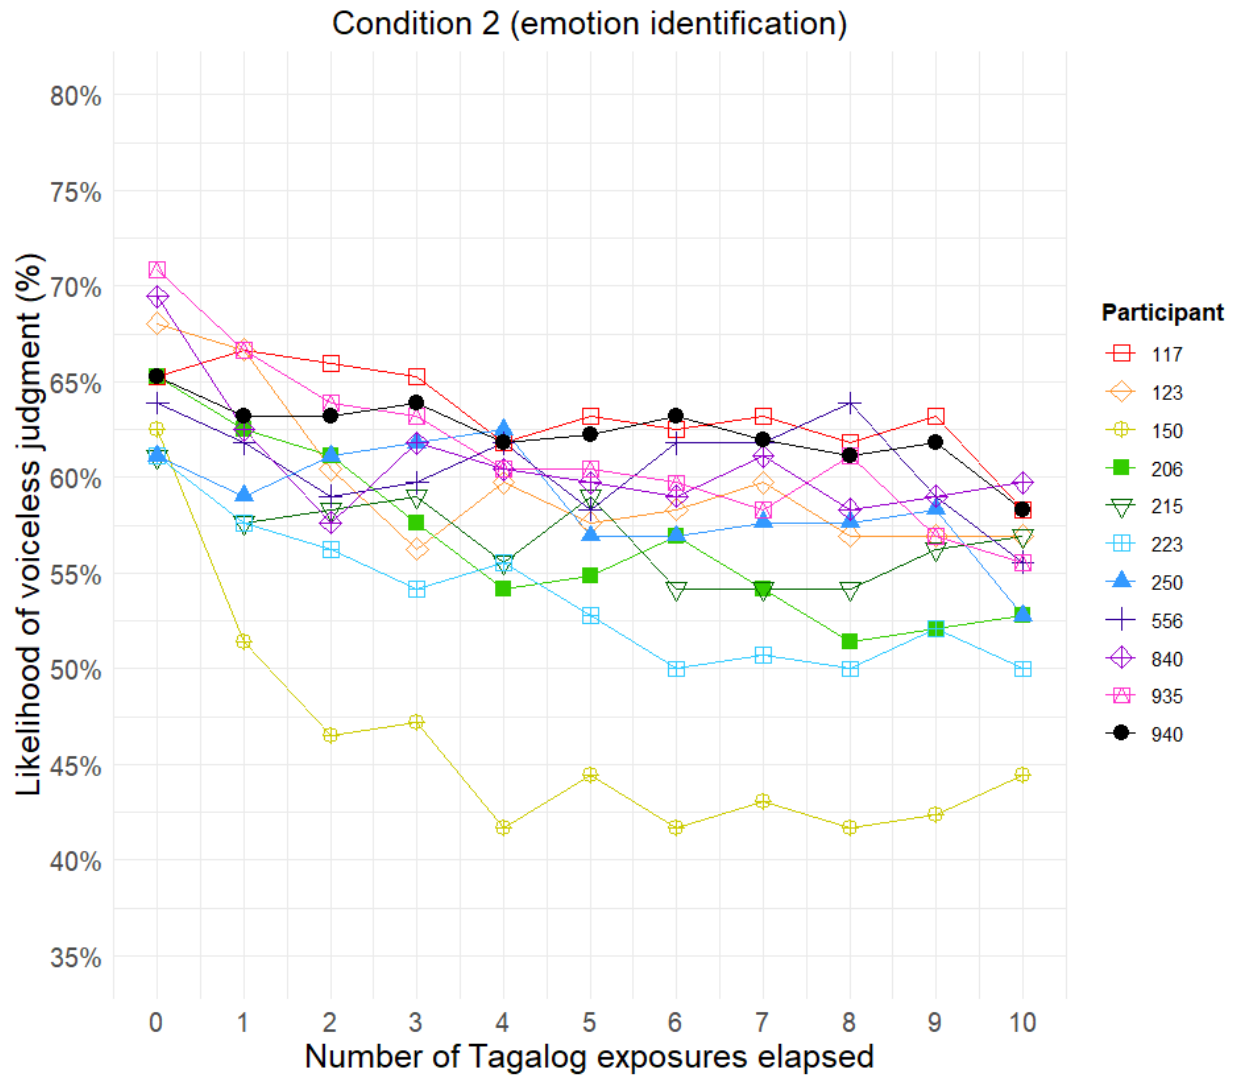

**Figure A3.** Percentages of voiceless identifications (HeardVoiceless) in Condition 3 (unrelated task), by number of exposures and participant. Points represent an individual participant's percentage of voiceless identifications at the given number of exposures.

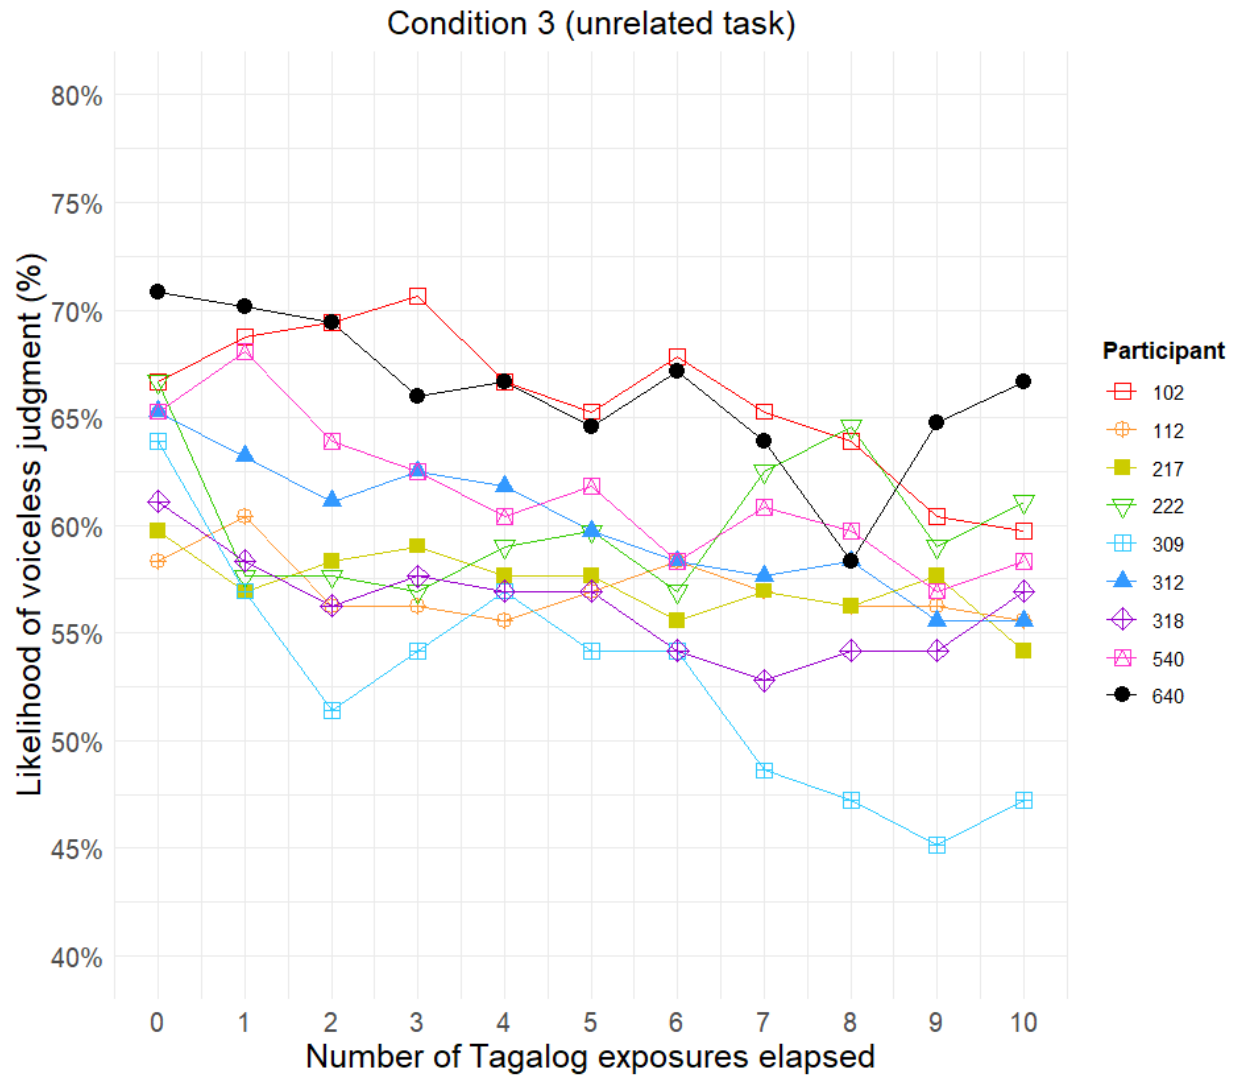

**Figure A4.** Percentages of voiceless identifications (HeardVoiceless) in Condition 4 (active control), by number of exposures and participant. Points represent an individual participant's percentage of voiceless identifications at the given number of exposures.

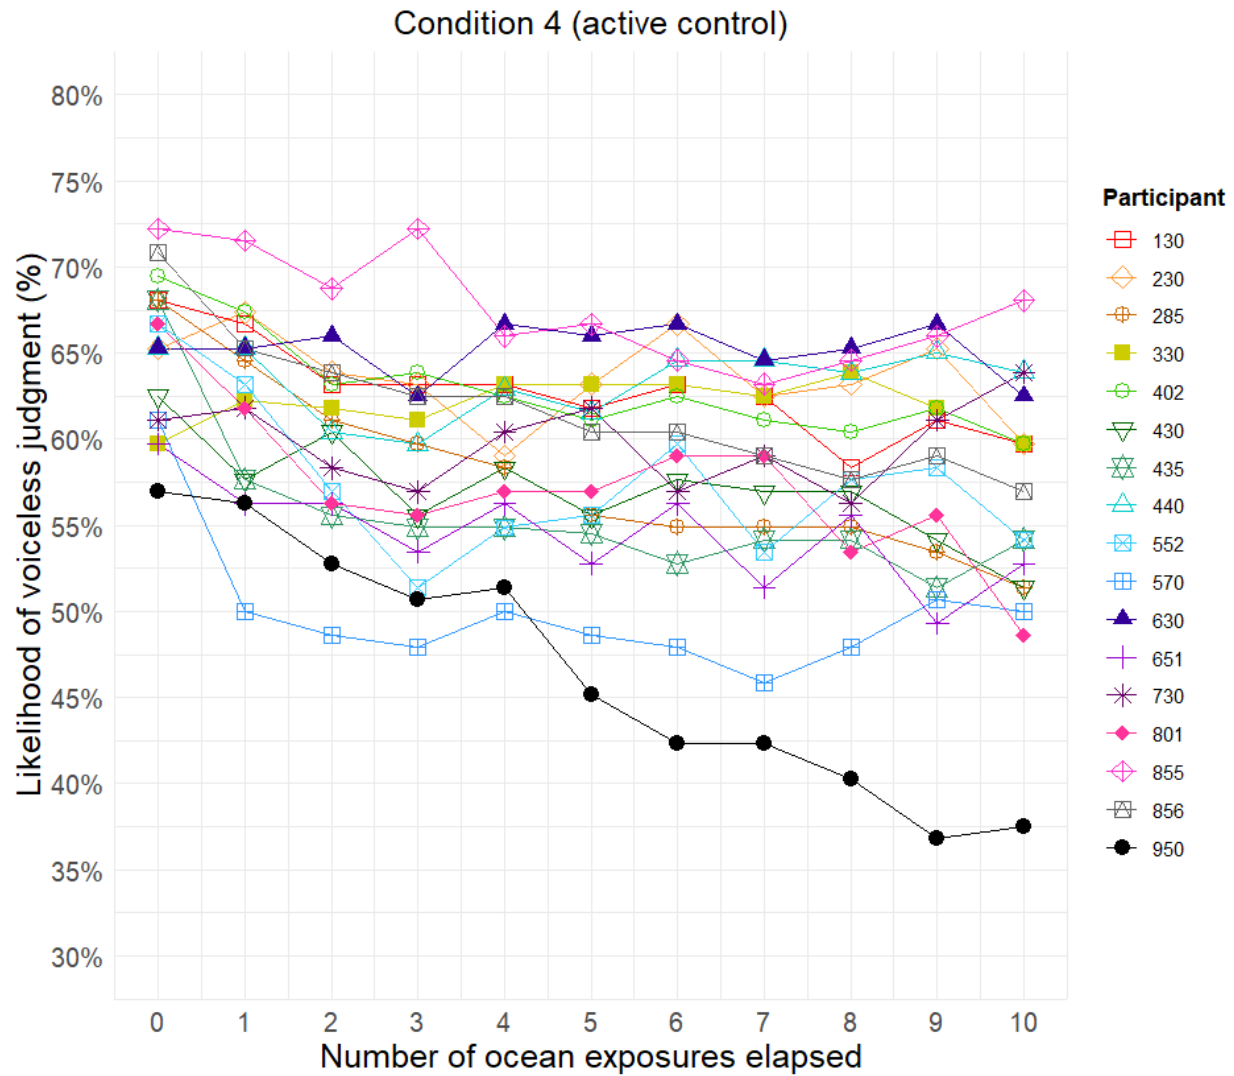

Supplement: s1 [file s1]
