# Supplementary material
Source: MDPI journal article supplement (https://www.mdpi.com/2226-471X/8/1/78)
Supplement: s1 [file s1]

Archive with 6 entries (6 files):
- ExploringOnsetOfDrift_ages_data.txt
- ExploringOnsetOfDrift_dataset.txt
- ExploringOnsetOfDrift_metadata.pdf
- ExploringOnsetOfDrift_models_and_graphs.pdf
- ExploringOnsetOfDrift_R_script.R
- ExploringOnsetOfDrift_Tagalog_wordlists.pdf
