# Supplementary material
Source: MDPI journal article supplement (https://www.mdpi.com/2226-471X/8/1/78)
Supplement: s1 [file s1 › ExploringOnsetOfDrift_ages_data.txt]

Participant	Condition	Age	Gender	TrueVoicing
535	1	50	F	0
840	2	52	F	1
540	3	44	F	1
640	3	21	F	0
430	4	21	F	1
630	4	20	F	1
230	4	72	F	0
435	4	26	F	0
835	1	18	M	1
935	2	18	M	1
940	2	50	M	1
330	4	48	M	1
730	4	24	M	1
130	4	73	M	1
440	4	26	M	1
402	4	19	F	1
801	4	21	F	1
150	2	20	F	0
250	2	22	F	1
320	1	19	F	0
950	4	22	F	1
460	1	21	F	1
780	1	21	F	1
285	4	23	F	1
251	1	21	F	0
556	2	19	F	1
856	4	19	F	1
855	4	19	M	1
570	4	19	M	1
552	4	20	M	0
185	1	18	M	1
952	1	18	M	0
651	4	18	O	1
203	1	26	F	1
205	1	23	F	1
216	1	22	F	1
212	1	22	F	1
113	1	18	F	1
111	1	NA	F	1
117	2	25	F	1
223	2	NA	F	1
123	2	19	F	1
206	2	NA	F	0
312	3	19	F	1
318	3	19	F	1
309	3	NA	F	1
222	3	19	F	0
102	3	18	F	1
207	1	NA	M	1
215	2	18	M	1
112	3	19	M	0
217	3	18	O	1
