# Supplementary material
Source: MDPI journal article supplement (https://www.mdpi.com/2226-471X/8/1/78)
Supplement: s1 [file s1 › ExploringOnsetOfDrift_dataset.txt]

Participant	Condition	Gender	Age	TrueVoicing	TrueVoiceRecency	Finished	Exposure	L1Task	Recency	Place	TrialNumber	Continuum	Step	SoundFile	HeardVoiceless	ResponseTime
150	2	F	20	0	NA	1	0	1	pre-test	velar	1	KG1	3	KG1_3.wav	0	1241.461129
150	2	F	20	0	NA	1	0	1	pre-test	velar	2	KG1	2	KG1_2.wav	0	476.999748
150	2	F	20	0	NA	1	0	1	pre-test	velar	3	KG1	9	KG1_9.wav	1	242.999233
150	2	F	20	0	NA	1	0	1	pre-test	velar	4	KG1	11	KG1_11.wav	1	207.729464
150	2	F	20	0	NA	1	0	1	pre-test	velar	5	KG1	8	KG1_8.wav	1	212.469143
150	2	F	20	0	NA	1	0	1	pre-test	velar	6	KG1	4	KG1_4.wav	1	388.774624
150	2	F	20	0	NA	1	0	1	pre-test	velar	7	KG1	10	KG1_10.wav	1	252.843632
150	2	F	20	0	NA	1	0	1	pre-test	velar	8	KG1	7	KG1_7.wav	1	209.649322
150	2	F	20	0	NA	1	0	1	pre-test	velar	9	KG1	12	KG1_12.wav	1	168.388184
150	2	F	20	0	NA	1	0	1	pre-test	velar	10	KG1	6	KG1_6.wav	1	2065.0913
150	2	F	20	0	NA	1	0	1	pre-test	velar	11	KG1	5	KG1_5.wav	0	1540.694111
150	2	F	20	0	NA	1	0	1	pre-test	velar	12	KG1	1	KG1_1.wav	0	207.025813
150	2	F	20	0	NA	1	0	1	pre-test	bilabial	13	PB1	4	PB1_4.wav	0	922.026353
150	2	F	20	0	NA	1	0	1	pre-test	bilabial	14	PB1	6	PB1_6.wav	1	450.558221
150	2	F	20	0	NA	1	0	1	pre-test	bilabial	15	PB1	7	PB1_7.wav	1	174.915632
150	2	F	20	0	NA	1	0	1	pre-test	bilabial	16	PB1	12	PB1_12.wav	1	164.665856
150	2	F	20	0	NA	1	0	1	pre-test	bilabial	17	PB1	1	PB1_1.wav	0	164.476081
150	2	F	20	0	NA	1	0	1	pre-test	bilabial	18	PB1	11	PB1_11.wav	1	73.989455
150	2	F	20	0	NA	1	0	1	pre-test	bilabial	19	PB1	5	PB1_5.wav	1	669.083709
150	2	F	20	0	NA	1	0	1	pre-test	bilabial	20	PB1	3	PB1_3.wav	0	137.105314
150	2	F	20	0	NA	1	0	1	pre-test	bilabial	21	PB1	8	PB1_8.wav	1	87.703629
150	2	F	20	0	NA	1	0	1	pre-test	bilabial	22	PB1	2	PB1_2.wav	0	82.802325
150	2	F	20	0	NA	1	0	1	pre-test	bilabial	23	PB1	10	PB1_10.wav	1	117.672975
150	2	F	20	0	NA	1	0	1	pre-test	bilabial	24	PB1	9	PB1_9.wav	1	133.245852
150	2	F	20	0	NA	1	0	1	pre-test	velar	25	KG2	10	KG2_10.wav	1	747.859775
150	2	F	20	0	NA	1	0	1	pre-test	velar	26	KG2	3	KG2_3.wav	0	90.957613
150	2	F	20	0	NA	1	0	1	pre-test	velar	27	KG2	5	KG2_5.wav	1	1266.029161
150	2	F	20	0	NA	1	0	1	pre-test	velar	28	KG2	11	KG2_11.wav	1	124.693651
150	2	F	20	0	NA	1	0	1	pre-test	velar	29	KG2	2	KG2_2.wav	0	165.152282
150	2	F	20	0	NA	1	0	1	pre-test	velar	30	KG2	8	KG2_8.wav	1	27.234009
150	2	F	20	0	NA	1	0	1	pre-test	velar	31	KG2	1	KG2_1.wav	0	19.184311
150	2	F	20	0	NA	1	0	1	pre-test	velar	32	KG2	12	KG2_12.wav	1	532.925368
150	2	F	20	0	NA	1	0	1	pre-test	velar	33	KG2	7	KG2_7.wav	1	515.861894
150	2	F	20	0	NA	1	0	1	pre-test	velar	34	KG2	4	KG2_4.wav	0	140.911341
150	2	F	20	0	NA	1	0	1	pre-test	velar	35	KG2	9	KG2_9.wav	1	195.380615
150	2	F	20	0	NA	1	0	1	pre-test	velar	36	KG2	6	KG2_6.wav	1	808.820274
150	2	F	20	0	NA	1	0	1	pre-test	bilabial	37	PB2	9	PB2_9.wav	1	306.874713
150	2	F	20	0	NA	1	0	1	pre-test	bilabial	38	PB2	1	PB2_1.wav	0	187.234174
150	2	F	20	0	NA	1	0	1	pre-test	bilabial	39	PB2	12	PB2_12.wav	1	169.506576
150	2	F	20	0	NA	1	0	1	pre-test	bilabial	40	PB2	3	PB2_3.wav	0	566.933963
150	2	F	20	0	NA	1	0	1	pre-test	bilabial	41	PB2	8	PB2_8.wav	1	234.625704
150	2	F	20	0	NA	1	0	1	pre-test	bilabial	42	PB2	10	PB2_10.wav	1	322.48924
150	2	F	20	0	NA	1	0	1	pre-test	bilabial	43	PB2	2	PB2_2.wav	0	181.272878
150	2	F	20	0	NA	1	0	1	pre-test	bilabial	44	PB2	7	PB2_7.wav	1	570.056369
150	2	F	20	0	NA	1	0	1	pre-test	bilabial	45	PB2	5	PB2_5.wav	1	2137.8307
150	2	F	20	0	NA	1	0	1	pre-test	bilabial	46	PB2	4	PB2_4.wav	0	244.108644
150	2	F	20	0	NA	1	0	1	pre-test	bilabial	47	PB2	6	PB2_6.wav	1	265.921591
150	2	F	20	0	NA	1	0	1	pre-test	bilabial	48	PB2	11	PB2_11.wav	1	75.254991
150	2	F	20	0	NA	1	0	1	pre-test	velar	49	KG3	4	KG3_4.wav	0	1068.220771
150	2	F	20	0	NA	1	0	1	pre-test	velar	50	KG3	3	KG3_3.wav	0	190.518415
150	2	F	20	0	NA	1	0	1	pre-test	velar	51	KG3	6	KG3_6.wav	0	722.503299
150	2	F	20	0	NA	1	0	1	pre-test	velar	52	KG3	5	KG3_5.wav	0	208.753287
150	2	F	20	0	NA	1	0	1	pre-test	velar	53	KG3	12	KG3_12.wav	1	479.267868
150	2	F	20	0	NA	1	0	1	pre-test	velar	54	KG3	1	KG3_1.wav	0	148.308146
150	2	F	20	0	NA	1	0	1	pre-test	velar	55	KG3	8	KG3_8.wav	1	1161.160182
150	2	F	20	0	NA	1	0	1	pre-test	velar	56	KG3	7	KG3_7.wav	1	335.38259
150	2	F	20	0	NA	1	0	1	pre-test	velar	57	KG3	11	KG3_11.wav	1	254.406349
150	2	F	20	0	NA	1	0	1	pre-test	velar	58	KG3	10	KG3_10.wav	1	94.667494
150	2	F	20	0	NA	1	0	1	pre-test	velar	59	KG3	2	KG3_2.wav	0	24.284562
150	2	F	20	0	NA	1	0	1	pre-test	velar	60	KG3	9	KG3_9.wav	1	22.878188
150	2	F	20	0	NA	1	0	1	pre-test	bilabial	61	PB3	5	PB3_5.wav	0	585.915858
150	2	F	20	0	NA	1	0	1	pre-test	bilabial	62	PB3	6	PB3_6.wav	1	257.835888
150	2	F	20	0	NA	1	0	1	pre-test	bilabial	63	PB3	11	PB3_11.wav	1	265.823049
150	2	F	20	0	NA	1	0	1	pre-test	bilabial	64	PB3	2	PB3_2.wav	0	150.064739
150	2	F	20	0	NA	1	0	1	pre-test	bilabial	65	PB3	9	PB3_9.wav	1	134.439746
150	2	F	20	0	NA	1	0	1	pre-test	bilabial	66	PB3	8	PB3_8.wav	1	135.779013
150	2	F	20	0	NA	1	0	1	pre-test	bilabial	67	PB3	1	PB3_1.wav	0	173.954905
150	2	F	20	0	NA	1	0	1	pre-test	bilabial	68	PB3	3	PB3_3.wav	0	219.203352
150	2	F	20	0	NA	1	0	1	pre-test	bilabial	69	PB3	4	PB3_4.wav	0	233.810935
150	2	F	20	0	NA	1	0	1	pre-test	bilabial	70	PB3	10	PB3_10.wav	1	272.920511
150	2	F	20	0	NA	1	0	1	pre-test	bilabial	71	PB3	12	PB3_12.wav	1	216.573118
150	2	F	20	0	NA	1	0	1	pre-test	bilabial	72	PB3	7	PB3_7.wav	1	243.927496
150	2	F	20	0	NA	1	1	2	post-test	bilabial	1	PB4	5	PB4_5.wav	0	2692.946961
150	2	F	20	0	NA	1	1	2	post-test	bilabial	2	PB4	12	PB4_12.wav	1	239.578873
150	2	F	20	0	NA	1	1	2	post-test	bilabial	3	PB4	8	PB4_8.wav	1	5.567486
150	2	F	20	0	NA	1	1	2	post-test	bilabial	4	PB4	2	PB4_2.wav	0	21.427791
150	2	F	20	0	NA	1	1	2	post-test	bilabial	5	PB4	1	PB4_1.wav	0	220.8859
150	2	F	20	0	NA	1	1	2	post-test	bilabial	6	PB4	6	PB4_6.wav	1	84.888445
150	2	F	20	0	NA	1	1	2	post-test	bilabial	7	PB4	9	PB4_9.wav	1	107.598157
150	2	F	20	0	NA	1	1	2	post-test	bilabial	8	PB4	3	PB4_3.wav	0	54.331091
150	2	F	20	0	NA	1	1	2	post-test	bilabial	9	PB4	4	PB4_4.wav	0	351.981771
150	2	F	20	0	NA	1	1	2	post-test	bilabial	10	PB4	10	PB4_10.wav	1	114.021299
150	2	F	20	0	NA	1	1	2	post-test	bilabial	11	PB4	7	PB4_7.wav	1	139.868094
150	2	F	20	0	NA	1	1	2	post-test	bilabial	12	PB4	11	PB4_11.wav	1	78.553707
150	2	F	20	0	NA	1	1	2	post-test	velar	13	KG4	4	KG4_4.wav	0	559.046225
150	2	F	20	0	NA	1	1	2	post-test	velar	14	KG4	1	KG4_1.wav	0	121.371502
150	2	F	20	0	NA	1	1	2	post-test	velar	15	KG4	9	KG4_9.wav	1	14.271851
150	2	F	20	0	NA	1	1	2	post-test	velar	16	KG4	2	KG4_2.wav	0	34.540295
150	2	F	20	0	NA	1	1	2	post-test	velar	17	KG4	8	KG4_8.wav	1	4.700151
150	2	F	20	0	NA	1	1	2	post-test	velar	18	KG4	10	KG4_10.wav	1	583.391952
150	2	F	20	0	NA	1	1	2	post-test	velar	19	KG4	12	KG4_12.wav	1	238.676359
150	2	F	20	0	NA	1	1	2	post-test	velar	20	KG4	11	KG4_11.wav	1	88.317269
150	2	F	20	0	NA	1	1	2	post-test	velar	21	KG4	6	KG4_6.wav	0	242.083375
150	2	F	20	0	NA	1	1	2	post-test	velar	22	KG4	7	KG4_7.wav	0	471.839332
150	2	F	20	0	NA	1	1	2	post-test	velar	23	KG4	5	KG4_5.wav	0	233.377276
150	2	F	20	0	NA	1	1	2	post-test	velar	24	KG4	3	KG4_3.wav	0	100.552144
150	2	F	20	0	NA	1	1	2	post-test	bilabial	25	PB5	7	PB5_7.wav	1	1007.516697
150	2	F	20	0	NA	1	1	2	post-test	bilabial	26	PB5	1	PB5_1.wav	0	171.583979
150	2	F	20	0	NA	1	1	2	post-test	bilabial	27	PB5	6	PB5_6.wav	1	114.746395
150	2	F	20	0	NA	1	1	2	post-test	bilabial	28	PB5	12	PB5_12.wav	1	276.312576
150	2	F	20	0	NA	1	1	2	post-test	bilabial	29	PB5	8	PB5_8.wav	1	281.184351
150	2	F	20	0	NA	1	1	2	post-test	bilabial	30	PB5	2	PB5_2.wav	0	174.359228
150	2	F	20	0	NA	1	1	2	post-test	bilabial	31	PB5	10	PB5_10.wav	1	54.394282
150	2	F	20	0	NA	1	1	2	post-test	bilabial	32	PB5	5	PB5_5.wav	0	339.637357
150	2	F	20	0	NA	1	1	2	post-test	bilabial	33	PB5	3	PB5_3.wav	0	224.743348
150	2	F	20	0	NA	1	1	2	post-test	bilabial	34	PB5	4	PB5_4.wav	0	128.131392
150	2	F	20	0	NA	1	1	2	post-test	bilabial	35	PB5	9	PB5_9.wav	1	122.715632
150	2	F	20	0	NA	1	1	2	post-test	bilabial	36	PB5	11	PB5_11.wav	1	188.652109
150	2	F	20	0	NA	1	1	2	post-test	velar	37	KG5	8	KG5_8.wav	0	1829.657218
150	2	F	20	0	NA	1	1	2	post-test	velar	38	KG5	10	KG5_10.wav	1	311.084625
150	2	F	20	0	NA	1	1	2	post-test	velar	39	KG5	7	KG5_7.wav	0	60.136277
150	2	F	20	0	NA	1	1	2	post-test	velar	40	KG5	4	KG5_4.wav	0	10.165787
150	2	F	20	0	NA	1	1	2	post-test	velar	41	KG5	1	KG5_1.wav	0	52.527723
150	2	F	20	0	NA	1	1	2	post-test	velar	42	KG5	2	KG5_2.wav	0	164.830551
150	2	F	20	0	NA	1	1	2	post-test	velar	43	KG5	9	KG5_9.wav	1	71.851842
150	2	F	20	0	NA	1	1	2	post-test	velar	44	KG5	3	KG5_3.wav	0	29.467389
150	2	F	20	0	NA	1	1	2	post-test	velar	45	KG5	5	KG5_5.wav	0	56.976397
150	2	F	20	0	NA	1	1	2	post-test	velar	46	KG5	6	KG5_6.wav	0	139.870689
150	2	F	20	0	NA	1	1	2	post-test	velar	47	KG5	11	KG5_11.wav	1	116.86701
150	2	F	20	0	NA	1	1	2	post-test	velar	48	KG5	12	KG5_12.wav	1	72.866833
150	2	F	20	0	NA	1	1	2	post-test	bilabial	49	PB6	10	PB6_10.wav	1	497.947538
150	2	F	20	0	NA	1	1	2	post-test	bilabial	50	PB6	12	PB6_12.wav	1	179.397692
150	2	F	20	0	NA	1	1	2	post-test	bilabial	51	PB6	9	PB6_9.wav	1	379.414286
150	2	F	20	0	NA	1	1	2	post-test	bilabial	52	PB6	11	PB6_11.wav	1	258.696799
150	2	F	20	0	NA	1	1	2	post-test	bilabial	53	PB6	8	PB6_8.wav	1	167.247228
150	2	F	20	0	NA	1	1	2	post-test	bilabial	54	PB6	6	PB6_6.wav	1	135.078693
150	2	F	20	0	NA	1	1	2	post-test	bilabial	55	PB6	7	PB6_7.wav	1	160.521275
150	2	F	20	0	NA	1	1	2	post-test	bilabial	56	PB6	5	PB6_5.wav	1	1169.026762
150	2	F	20	0	NA	1	1	2	post-test	bilabial	57	PB6	2	PB6_2.wav	0	208.385183
150	2	F	20	0	NA	1	1	2	post-test	bilabial	58	PB6	3	PB6_3.wav	0	135.471812
150	2	F	20	0	NA	1	1	2	post-test	bilabial	59	PB6	4	PB6_4.wav	0	87.745095
150	2	F	20	0	NA	1	1	2	post-test	bilabial	60	PB6	1	PB6_1.wav	0	52.225911
150	2	F	20	0	NA	1	1	2	post-test	velar	61	KG6	2	KG6_2.wav	0	379.277595
150	2	F	20	0	NA	1	1	2	post-test	velar	62	KG6	12	KG6_12.wav	1	23.352087
150	2	F	20	0	NA	1	1	2	post-test	velar	63	KG6	7	KG6_7.wav	0	184.112819
150	2	F	20	0	NA	1	1	2	post-test	velar	64	KG6	6	KG6_6.wav	0	171.801197
150	2	F	20	0	NA	1	1	2	post-test	velar	65	KG6	5	KG6_5.wav	0	61.50779
150	2	F	20	0	NA	1	1	2	post-test	velar	66	KG6	11	KG6_11.wav	1	61.190299
150	2	F	20	0	NA	1	1	2	post-test	velar	67	KG6	8	KG6_8.wav	1	27.118776
150	2	F	20	0	NA	1	1	2	post-test	velar	68	KG6	9	KG6_9.wav	1	469.683985
150	2	F	20	0	NA	1	1	2	post-test	velar	69	KG6	10	KG6_10.wav	1	228.504117
150	2	F	20	0	NA	1	1	2	post-test	velar	70	KG6	4	KG6_4.wav	0	173.639933
150	2	F	20	0	NA	1	1	2	post-test	velar	71	KG6	3	KG6_3.wav	0	275.879478
150	2	F	20	0	NA	1	1	2	post-test	velar	72	KG6	1	KG6_1.wav	0	183.514292
150	2	F	20	0	NA	1	1	3	pre-test	velar	1	KG1	1	KG1_1.wav	0	3166.0655
150	2	F	20	0	NA	1	1	3	pre-test	velar	2	KG1	8	KG1_8.wav	1	351.9914999
150	2	F	20	0	NA	1	1	3	pre-test	velar	3	KG1	7	KG1_7.wav	1	360.4938
150	2	F	20	0	NA	1	1	3	pre-test	velar	4	KG1	2	KG1_2.wav	0	597.0047
150	2	F	20	0	NA	1	1	3	pre-test	velar	5	KG1	5	KG1_5.wav	1	1897.7729
150	2	F	20	0	NA	1	1	3	pre-test	velar	6	KG1	12	KG1_12.wav	1	342.1848
150	2	F	20	0	NA	1	1	3	pre-test	velar	7	KG1	3	KG1_3.wav	0	218.6746
150	2	F	20	0	NA	1	1	3	pre-test	velar	8	KG1	10	KG1_10.wav	1	267.4012
150	2	F	20	0	NA	1	1	3	pre-test	velar	9	KG1	4	KG1_4.wav	0	217.5575
150	2	F	20	0	NA	1	1	3	pre-test	velar	10	KG1	11	KG1_11.wav	1	182.3159
150	2	F	20	0	NA	1	1	3	pre-test	velar	11	KG1	6	KG1_6.wav	1	181.8788
150	2	F	20	0	NA	1	1	3	pre-test	velar	12	KG1	9	KG1_9.wav	1	133.5257
150	2	F	20	0	NA	1	1	3	pre-test	bilabial	13	PB1	11	PB1_11.wav	1	590.0645
150	2	F	20	0	NA	1	1	3	pre-test	bilabial	14	PB1	2	PB1_2.wav	0	189.1399
150	2	F	20	0	NA	1	1	3	pre-test	bilabial	15	PB1	6	PB1_6.wav	1	1838.6146
150	2	F	20	0	NA	1	1	3	pre-test	bilabial	16	PB1	7	PB1_7.wav	1	877.5881
150	2	F	20	0	NA	1	1	3	pre-test	bilabial	17	PB1	12	PB1_12.wav	1	172.1789
150	2	F	20	0	NA	1	1	3	pre-test	bilabial	18	PB1	1	PB1_1.wav	0	99.4526
150	2	F	20	0	NA	1	1	3	pre-test	bilabial	19	PB1	3	PB1_3.wav	0	72.32079998
150	2	F	20	0	NA	1	1	3	pre-test	bilabial	20	PB1	4	PB1_4.wav	1	214.5158
150	2	F	20	0	NA	1	1	3	pre-test	bilabial	21	PB1	8	PB1_8.wav	1	132.1279
150	2	F	20	0	NA	1	1	3	pre-test	bilabial	22	PB1	10	PB1_10.wav	1	148.9939
150	2	F	20	0	NA	1	1	3	pre-test	bilabial	23	PB1	9	PB1_9.wav	1	113.2731
150	2	F	20	0	NA	1	1	3	pre-test	bilabial	24	PB1	5	PB1_5.wav	0	1718.1834
150	2	F	20	0	NA	1	1	3	pre-test	velar	25	KG2	9	KG2_9.wav	1	546.5194
150	2	F	20	0	NA	1	1	3	pre-test	velar	26	KG2	8	KG2_8.wav	1	185.1303
150	2	F	20	0	NA	1	1	3	pre-test	velar	27	KG2	1	KG2_1.wav	0	164.4179
150	2	F	20	0	NA	1	1	3	pre-test	velar	28	KG2	11	KG2_11.wav	1	92.46829996
150	2	F	20	0	NA	1	1	3	pre-test	velar	29	KG2	5	KG2_5.wav	0	101.1909
150	2	F	20	0	NA	1	1	3	pre-test	velar	30	KG2	12	KG2_12.wav	1	194.4588
150	2	F	20	0	NA	1	1	3	pre-test	velar	31	KG2	10	KG2_10.wav	1	361.6575
150	2	F	20	0	NA	1	1	3	pre-test	velar	32	KG2	4	KG2_4.wav	0	169.0838001
150	2	F	20	0	NA	1	1	3	pre-test	velar	33	KG2	7	KG2_7.wav	0	234.2994
150	2	F	20	0	NA	1	1	3	pre-test	velar	34	KG2	3	KG2_3.wav	0	129.7325
150	2	F	20	0	NA	1	1	3	pre-test	velar	35	KG2	6	KG2_6.wav	0	165.2115
150	2	F	20	0	NA	1	1	3	pre-test	velar	36	KG2	2	KG2_2.wav	0	60.58539997
150	2	F	20	0	NA	1	1	3	pre-test	bilabial	37	PB2	10	PB2_10.wav	1	311.3078
150	2	F	20	0	NA	1	1	3	pre-test	bilabial	38	PB2	6	PB2_6.wav	0	502.5244
150	2	F	20	0	NA	1	1	3	pre-test	bilabial	39	PB2	1	PB2_1.wav	0	196.6927
150	2	F	20	0	NA	1	1	3	pre-test	bilabial	40	PB2	7	PB2_7.wav	1	191.5008
150	2	F	20	0	NA	1	1	3	pre-test	bilabial	41	PB2	5	PB2_5.wav	1	142.15
150	2	F	20	0	NA	1	1	3	pre-test	bilabial	42	PB2	2	PB2_2.wav	0	109.3857
150	2	F	20	0	NA	1	1	3	pre-test	bilabial	43	PB2	4	PB2_4.wav	0	224.7103
150	2	F	20	0	NA	1	1	3	pre-test	bilabial	44	PB2	3	PB2_3.wav	0	211.6032999
150	2	F	20	0	NA	1	1	3	pre-test	bilabial	45	PB2	11	PB2_11.wav	1	219.988
150	2	F	20	0	NA	1	1	3	pre-test	bilabial	46	PB2	9	PB2_9.wav	1	233.8648
150	2	F	20	0	NA	1	1	3	pre-test	bilabial	47	PB2	12	PB2_12.wav	1	233.4192
150	2	F	20	0	NA	1	1	3	pre-test	bilabial	48	PB2	8	PB2_8.wav	1	177.6215
150	2	F	20	0	NA	1	1	3	pre-test	velar	49	KG3	12	KG3_12.wav	1	486.3386
150	2	F	20	0	NA	1	1	3	pre-test	velar	50	KG3	4	KG3_4.wav	0	220.0358
150	2	F	20	0	NA	1	1	3	pre-test	velar	51	KG3	7	KG3_7.wav	0	433.7475999
150	2	F	20	0	NA	1	1	3	pre-test	velar	52	KG3	6	KG3_6.wav	0	209.8875
150	2	F	20	0	NA	1	1	3	pre-test	velar	53	KG3	10	KG3_10.wav	1	278.979
150	2	F	20	0	NA	1	1	3	pre-test	velar	54	KG3	2	KG3_2.wav	0	156.6968
150	2	F	20	0	NA	1	1	3	pre-test	velar	55	KG3	9	KG3_9.wav	0	254.0273
150	2	F	20	0	NA	1	1	3	pre-test	velar	56	KG3	3	KG3_3.wav	0	282.7492
150	2	F	20	0	NA	1	1	3	pre-test	velar	57	KG3	5	KG3_5.wav	0	174.4208
150	2	F	20	0	NA	1	1	3	pre-test	velar	58	KG3	8	KG3_8.wav	1	247.6862
150	2	F	20	0	NA	1	1	3	pre-test	velar	59	KG3	11	KG3_11.wav	1	40.42649997
150	2	F	20	0	NA	1	1	3	pre-test	velar	60	KG3	1	KG3_1.wav	0	70.67699998
150	2	F	20	0	NA	1	1	3	pre-test	bilabial	61	PB3	2	PB3_2.wav	0	526.0906
150	2	F	20	0	NA	1	1	3	pre-test	bilabial	62	PB3	5	PB3_5.wav	1	1964.3117
150	2	F	20	0	NA	1	1	3	pre-test	bilabial	63	PB3	1	PB3_1.wav	0	237.1361
150	2	F	20	0	NA	1	1	3	pre-test	bilabial	64	PB3	9	PB3_9.wav	1	177.1819
150	2	F	20	0	NA	1	1	3	pre-test	bilabial	65	PB3	12	PB3_12.wav	1	244.3076
150	2	F	20	0	NA	1	1	3	pre-test	bilabial	66	PB3	4	PB3_4.wav	0	388.0785
150	2	F	20	0	NA	1	1	3	pre-test	bilabial	67	PB3	11	PB3_11.wav	0	239.697
150	2	F	20	0	NA	1	1	3	pre-test	bilabial	68	PB3	6	PB3_6.wav	0	271.5616
150	2	F	20	0	NA	1	1	3	pre-test	bilabial	69	PB3	10	PB3_10.wav	1	180.0771
150	2	F	20	0	NA	1	1	3	pre-test	bilabial	70	PB3	8	PB3_8.wav	1	226.3483
150	2	F	20	0	NA	1	1	3	pre-test	bilabial	71	PB3	3	PB3_3.wav	0	527.8713
150	2	F	20	0	NA	1	1	3	pre-test	bilabial	72	PB3	7	PB3_7.wav	1	1415.8966
150	2	F	20	0	NA	1	2	4	post-test	bilabial	1	PB4	1	PB4_1.wav	0	293.8581
150	2	F	20	0	NA	1	2	4	post-test	bilabial	2	PB4	2	PB4_2.wav	0	202.8126
150	2	F	20	0	NA	1	2	4	post-test	bilabial	3	PB4	3	PB4_3.wav	0	251.0707
150	2	F	20	0	NA	1	2	4	post-test	bilabial	4	PB4	10	PB4_10.wav	1	252.7247
150	2	F	20	0	NA	1	2	4	post-test	bilabial	5	PB4	4	PB4_4.wav	0	118.8182
150	2	F	20	0	NA	1	2	4	post-test	bilabial	6	PB4	6	PB4_6.wav	0	304.4354
150	2	F	20	0	NA	1	2	4	post-test	bilabial	7	PB4	9	PB4_9.wav	1	219.2321
150	2	F	20	0	NA	1	2	4	post-test	bilabial	8	PB4	7	PB4_7.wav	1	26.62190003
150	2	F	20	0	NA	1	2	4	post-test	bilabial	9	PB4	11	PB4_11.wav	1	74.42259998
150	2	F	20	0	NA	1	2	4	post-test	bilabial	10	PB4	8	PB4_8.wav	1	132.1287
150	2	F	20	0	NA	1	2	4	post-test	bilabial	11	PB4	12	PB4_12.wav	1	155.4985
150	2	F	20	0	NA	1	2	4	post-test	bilabial	12	PB4	5	PB4_5.wav	0	278.0884
150	2	F	20	0	NA	1	2	4	post-test	velar	13	KG4	12	KG4_12.wav	1	445.9984
150	2	F	20	0	NA	1	2	4	post-test	velar	14	KG4	10	KG4_10.wav	1	199.3795
150	2	F	20	0	NA	1	2	4	post-test	velar	15	KG4	8	KG4_8.wav	1	141.0566
150	2	F	20	0	NA	1	2	4	post-test	velar	16	KG4	6	KG4_6.wav	0	387.764
150	2	F	20	0	NA	1	2	4	post-test	velar	17	KG4	11	KG4_11.wav	1	180.78
150	2	F	20	0	NA	1	2	4	post-test	velar	18	KG4	5	KG4_5.wav	0	142.838
150	2	F	20	0	NA	1	2	4	post-test	velar	19	KG4	2	KG4_2.wav	0	145.4135
150	2	F	20	0	NA	1	2	4	post-test	velar	20	KG4	3	KG4_3.wav	0	142.9634
150	2	F	20	0	NA	1	2	4	post-test	velar	21	KG4	7	KG4_7.wav	0	245.885
150	2	F	20	0	NA	1	2	4	post-test	velar	22	KG4	1	KG4_1.wav	0	178.2592
150	2	F	20	0	NA	1	2	4	post-test	velar	23	KG4	4	KG4_4.wav	0	230.3577
150	2	F	20	0	NA	1	2	4	post-test	velar	24	KG4	9	KG4_9.wav	1	121.9452
150	2	F	20	0	NA	1	2	4	post-test	bilabial	25	PB5	2	PB5_2.wav	0	543.7058
150	2	F	20	0	NA	1	2	4	post-test	bilabial	26	PB5	10	PB5_10.wav	1	300.9221
150	2	F	20	0	NA	1	2	4	post-test	bilabial	27	PB5	7	PB5_7.wav	0	614.7628
150	2	F	20	0	NA	1	2	4	post-test	bilabial	28	PB5	9	PB5_9.wav	1	300.6207
150	2	F	20	0	NA	1	2	4	post-test	bilabial	29	PB5	5	PB5_5.wav	0	366.2488
150	2	F	20	0	NA	1	2	4	post-test	bilabial	30	PB5	8	PB5_8.wav	1	164.2123
150	2	F	20	0	NA	1	2	4	post-test	bilabial	31	PB5	1	PB5_1.wav	0	172.6345
150	2	F	20	0	NA	1	2	4	post-test	bilabial	32	PB5	12	PB5_12.wav	1	205.6682
150	2	F	20	0	NA	1	2	4	post-test	bilabial	33	PB5	4	PB5_4.wav	0	132.8215
150	2	F	20	0	NA	1	2	4	post-test	bilabial	34	PB5	11	PB5_11.wav	1	55.44660002
150	2	F	20	0	NA	1	2	4	post-test	bilabial	35	PB5	3	PB5_3.wav	0	113.6715
150	2	F	20	0	NA	1	2	4	post-test	bilabial	36	PB5	6	PB5_6.wav	1	774.4465
150	2	F	20	0	NA	1	2	4	post-test	velar	37	KG5	12	KG5_12.wav	1	294.0934
150	2	F	20	0	NA	1	2	4	post-test	velar	38	KG5	2	KG5_2.wav	0	83.90810003
150	2	F	20	0	NA	1	2	4	post-test	velar	39	KG5	9	KG5_9.wav	1	426.7409
150	2	F	20	0	NA	1	2	4	post-test	velar	40	KG5	4	KG5_4.wav	0	129.8468
150	2	F	20	0	NA	1	2	4	post-test	velar	41	KG5	1	KG5_1.wav	0	124.0514
150	2	F	20	0	NA	1	2	4	post-test	velar	42	KG5	7	KG5_7.wav	1	183.3185
150	2	F	20	0	NA	1	2	4	post-test	velar	43	KG5	11	KG5_11.wav	1	78.683
150	2	F	20	0	NA	1	2	4	post-test	velar	44	KG5	3	KG5_3.wav	0	27.78509998
150	2	F	20	0	NA	1	2	4	post-test	velar	45	KG5	6	KG5_6.wav	0	401.1892
150	2	F	20	0	NA	1	2	4	post-test	velar	46	KG5	8	KG5_8.wav	1	590.4892
150	2	F	20	0	NA	1	2	4	post-test	velar	47	KG5	10	KG5_10.wav	1	115.6448
150	2	F	20	0	NA	1	2	4	post-test	velar	48	KG5	5	KG5_5.wav	0	111.2694
150	2	F	20	0	NA	1	2	4	post-test	bilabial	49	PB6	9	PB6_9.wav	1	497.0554
150	2	F	20	0	NA	1	2	4	post-test	bilabial	50	PB6	7	PB6_7.wav	1	211.2551
150	2	F	20	0	NA	1	2	4	post-test	bilabial	51	PB6	3	PB6_3.wav	0	167.8859
150	2	F	20	0	NA	1	2	4	post-test	bilabial	52	PB6	1	PB6_1.wav	0	393.1836
150	2	F	20	0	NA	1	2	4	post-test	bilabial	53	PB6	10	PB6_10.wav	1	186.9472
150	2	F	20	0	NA	1	2	4	post-test	bilabial	54	PB6	6	PB6_6.wav	1	291.4595
150	2	F	20	0	NA	1	2	4	post-test	bilabial	55	PB6	11	PB6_11.wav	1	267.4904
150	2	F	20	0	NA	1	2	4	post-test	bilabial	56	PB6	5	PB6_5.wav	0	249.2481
150	2	F	20	0	NA	1	2	4	post-test	bilabial	57	PB6	4	PB6_4.wav	0	257.1232
150	2	F	20	0	NA	1	2	4	post-test	bilabial	58	PB6	2	PB6_2.wav	0	155.8909
150	2	F	20	0	NA	1	2	4	post-test	bilabial	59	PB6	8	PB6_8.wav	1	172.589
150	2	F	20	0	NA	1	2	4	post-test	bilabial	60	PB6	12	PB6_12.wav	1	168.3056999
150	2	F	20	0	NA	1	2	4	post-test	velar	61	KG6	1	KG6_1.wav	0	348.6918
150	2	F	20	0	NA	1	2	4	post-test	velar	62	KG6	8	KG6_8.wav	1	95.8449
150	2	F	20	0	NA	1	2	4	post-test	velar	63	KG6	6	KG6_6.wav	0	79.47269996
150	2	F	20	0	NA	1	2	4	post-test	velar	64	KG6	10	KG6_10.wav	1	73.31579999
150	2	F	20	0	NA	1	2	4	post-test	velar	65	KG6	4	KG6_4.wav	0	29.4154
150	2	F	20	0	NA	1	2	4	post-test	velar	66	KG6	7	KG6_7.wav	0	109.3326
150	2	F	20	0	NA	1	2	4	post-test	velar	67	KG6	5	KG6_5.wav	0	73.88749998
150	2	F	20	0	NA	1	2	4	post-test	velar	68	KG6	12	KG6_12.wav	1	84.5465
150	2	F	20	0	NA	1	2	4	post-test	velar	69	KG6	9	KG6_9.wav	1	35.44890002
150	2	F	20	0	NA	1	2	4	post-test	velar	70	KG6	11	KG6_11.wav	1	50.90259999
150	2	F	20	0	NA	1	2	4	post-test	velar	71	KG6	3	KG6_3.wav	0	115.0993
150	2	F	20	0	NA	1	2	4	post-test	velar	72	KG6	2	KG6_2.wav	0	88.87840004
150	2	F	20	0	NA	1	2	5	pre-test	velar	1	KG1	12	KG1_12.wav	1	768.395684
150	2	F	20	0	NA	1	2	5	pre-test	velar	2	KG1	10	KG1_10.wav	1	159.242228
150	2	F	20	0	NA	1	2	5	pre-test	velar	3	KG1	9	KG1_9.wav	1	198.937939
150	2	F	20	0	NA	1	2	5	pre-test	velar	4	KG1	11	KG1_11.wav	1	176.375293
150	2	F	20	0	NA	1	2	5	pre-test	velar	5	KG1	7	KG1_7.wav	0	256.751692
150	2	F	20	0	NA	1	2	5	pre-test	velar	6	KG1	1	KG1_1.wav	0	498.429909
150	2	F	20	0	NA	1	2	5	pre-test	velar	7	KG1	2	KG1_2.wav	0	160.708867
150	2	F	20	0	NA	1	2	5	pre-test	velar	8	KG1	4	KG1_4.wav	0	162.54923
150	2	F	20	0	NA	1	2	5	pre-test	velar	9	KG1	8	KG1_8.wav	1	986.667734
150	2	F	20	0	NA	1	2	5	pre-test	velar	10	KG1	6	KG1_6.wav	0	258.447038
150	2	F	20	0	NA	1	2	5	pre-test	velar	11	KG1	5	KG1_5.wav	0	239.171924
150	2	F	20	0	NA	1	2	5	pre-test	velar	12	KG1	3	KG1_3.wav	0	156.908359
150	2	F	20	0	NA	1	2	5	pre-test	bilabial	13	PB1	1	PB1_1.wav	0	547.883483
150	2	F	20	0	NA	1	2	5	pre-test	bilabial	14	PB1	4	PB1_4.wav	0	2074.140044
150	2	F	20	0	NA	1	2	5	pre-test	bilabial	15	PB1	9	PB1_9.wav	1	190.187026
150	2	F	20	0	NA	1	2	5	pre-test	bilabial	16	PB1	7	PB1_7.wav	1	342.202599
150	2	F	20	0	NA	1	2	5	pre-test	bilabial	17	PB1	8	PB1_8.wav	1	171.093505
150	2	F	20	0	NA	1	2	5	pre-test	bilabial	18	PB1	10	PB1_10.wav	1	137.90917
150	2	F	20	0	NA	1	2	5	pre-test	bilabial	19	PB1	5	PB1_5.wav	0	1101.118012
150	2	F	20	0	NA	1	2	5	pre-test	bilabial	20	PB1	3	PB1_3.wav	0	250.592734
150	2	F	20	0	NA	1	2	5	pre-test	bilabial	21	PB1	6	PB1_6.wav	0	2199.173242
150	2	F	20	0	NA	1	2	5	pre-test	bilabial	22	PB1	12	PB1_12.wav	1	227.250079
150	2	F	20	0	NA	1	2	5	pre-test	bilabial	23	PB1	11	PB1_11.wav	1	182.902904
150	2	F	20	0	NA	1	2	5	pre-test	bilabial	24	PB1	2	PB1_2.wav	0	109.881737
150	2	F	20	0	NA	1	2	5	pre-test	velar	25	KG2	7	KG2_7.wav	0	581.675265
150	2	F	20	0	NA	1	2	5	pre-test	velar	26	KG2	8	KG2_8.wav	1	377.208192
150	2	F	20	0	NA	1	2	5	pre-test	velar	27	KG2	12	KG2_12.wav	1	182.707971
150	2	F	20	0	NA	1	2	5	pre-test	velar	28	KG2	11	KG2_11.wav	1	132.783489
150	2	F	20	0	NA	1	2	5	pre-test	velar	29	KG2	1	KG2_1.wav	0	99.700984
150	2	F	20	0	NA	1	2	5	pre-test	velar	30	KG2	9	KG2_9.wav	1	1486.360399
150	2	F	20	0	NA	1	2	5	pre-test	velar	31	KG2	2	KG2_2.wav	0	231.694975
150	2	F	20	0	NA	1	2	5	pre-test	velar	32	KG2	3	KG2_3.wav	0	106.34467
150	2	F	20	0	NA	1	2	5	pre-test	velar	33	KG2	10	KG2_10.wav	1	219.385721
150	2	F	20	0	NA	1	2	5	pre-test	velar	34	KG2	5	KG2_5.wav	0	40.200495
150	2	F	20	0	NA	1	2	5	pre-test	velar	35	KG2	4	KG2_4.wav	0	56.89467
150	2	F	20	0	NA	1	2	5	pre-test	velar	36	KG2	6	KG2_6.wav	0	102.049154
150	2	F	20	0	NA	1	2	5	pre-test	bilabial	37	PB2	2	PB2_2.wav	0	877.633753
150	2	F	20	0	NA	1	2	5	pre-test	bilabial	38	PB2	9	PB2_9.wav	1	224.707212
150	2	F	20	0	NA	1	2	5	pre-test	bilabial	39	PB2	3	PB2_3.wav	0	217.770022
150	2	F	20	0	NA	1	2	5	pre-test	bilabial	40	PB2	11	PB2_11.wav	1	124.735265
150	2	F	20	0	NA	1	2	5	pre-test	bilabial	41	PB2	12	PB2_12.wav	1	159.982029
150	2	F	20	0	NA	1	2	5	pre-test	bilabial	42	PB2	4	PB2_4.wav	0	202.694658
150	2	F	20	0	NA	1	2	5	pre-test	bilabial	43	PB2	1	PB2_1.wav	0	128.152711
150	2	F	20	0	NA	1	2	5	pre-test	bilabial	44	PB2	6	PB2_6.wav	1	606.9936
150	2	F	20	0	NA	1	2	5	pre-test	bilabial	45	PB2	5	PB2_5.wav	0	476.788749
150	2	F	20	0	NA	1	2	5	pre-test	bilabial	46	PB2	10	PB2_10.wav	1	329.893989
150	2	F	20	0	NA	1	2	5	pre-test	bilabial	47	PB2	7	PB2_7.wav	0	221.71199
150	2	F	20	0	NA	1	2	5	pre-test	bilabial	48	PB2	8	PB2_8.wav	0	273.32672
150	2	F	20	0	NA	1	2	5	pre-test	velar	49	KG3	2	KG3_2.wav	0	295.725369
150	2	F	20	0	NA	1	2	5	pre-test	velar	50	KG3	8	KG3_8.wav	0	1088.896959
150	2	F	20	0	NA	1	2	5	pre-test	velar	51	KG3	4	KG3_4.wav	0	218.665104
150	2	F	20	0	NA	1	2	5	pre-test	velar	52	KG3	10	KG3_10.wav	1	140.917355
150	2	F	20	0	NA	1	2	5	pre-test	velar	53	KG3	1	KG3_1.wav	0	453.634794
150	2	F	20	0	NA	1	2	5	pre-test	velar	54	KG3	12	KG3_12.wav	1	45.18275
150	2	F	20	0	NA	1	2	5	pre-test	velar	55	KG3	5	KG3_5.wav	0	80.073369
150	2	F	20	0	NA	1	2	5	pre-test	velar	56	KG3	9	KG3_9.wav	1	74.001
150	2	F	20	0	NA	1	2	5	pre-test	velar	57	KG3	3	KG3_3.wav	0	83.437922
150	2	F	20	0	NA	1	2	5	pre-test	velar	58	KG3	7	KG3_7.wav	1	382.128954
150	2	F	20	0	NA	1	2	5	pre-test	velar	59	KG3	6	KG3_6.wav	0	233.736804
150	2	F	20	0	NA	1	2	5	pre-test	velar	60	KG3	11	KG3_11.wav	1	99.360707
150	2	F	20	0	NA	1	2	5	pre-test	bilabial	61	PB3	8	PB3_8.wav	1	265.044505
150	2	F	20	0	NA	1	2	5	pre-test	bilabial	62	PB3	5	PB3_5.wav	0	593.981274
150	2	F	20	0	NA	1	2	5	pre-test	bilabial	63	PB3	2	PB3_2.wav	0	130.493194
150	2	F	20	0	NA	1	2	5	pre-test	bilabial	64	PB3	12	PB3_12.wav	1	151.605369
150	2	F	20	0	NA	1	2	5	pre-test	bilabial	65	PB3	1	PB3_1.wav	0	153.344509
150	2	F	20	0	NA	1	2	5	pre-test	bilabial	66	PB3	9	PB3_9.wav	1	161.935856
150	2	F	20	0	NA	1	2	5	pre-test	bilabial	67	PB3	3	PB3_3.wav	0	99.312545
150	2	F	20	0	NA	1	2	5	pre-test	bilabial	68	PB3	10	PB3_10.wav	1	192.294242
150	2	F	20	0	NA	1	2	5	pre-test	bilabial	69	PB3	6	PB3_6.wav	0	912.064453
150	2	F	20	0	NA	1	2	5	pre-test	bilabial	70	PB3	7	PB3_7.wav	1	252.259341
150	2	F	20	0	NA	1	2	5	pre-test	bilabial	71	PB3	11	PB3_11.wav	1	176.341758
150	2	F	20	0	NA	1	2	5	pre-test	bilabial	72	PB3	4	PB3_4.wav	0	96.969737
150	2	F	20	0	NA	1	3	6	post-test	bilabial	1	PB4	3	PB4_3.wav	0	651.419385
150	2	F	20	0	NA	1	3	6	post-test	bilabial	2	PB4	9	PB4_9.wav	1	150.400213
150	2	F	20	0	NA	1	3	6	post-test	bilabial	3	PB4	6	PB4_6.wav	1	396.133185
150	2	F	20	0	NA	1	3	6	post-test	bilabial	4	PB4	12	PB4_12.wav	1	113.129784
150	2	F	20	0	NA	1	3	6	post-test	bilabial	5	PB4	2	PB4_2.wav	0	474.024857
150	2	F	20	0	NA	1	3	6	post-test	bilabial	6	PB4	5	PB4_5.wav	0	125.542747
150	2	F	20	0	NA	1	3	6	post-test	bilabial	7	PB4	1	PB4_1.wav	0	34.809447
150	2	F	20	0	NA	1	3	6	post-test	bilabial	8	PB4	11	PB4_11.wav	1	0.283452
150	2	F	20	0	NA	1	3	6	post-test	bilabial	9	PB4	4	PB4_4.wav	0	120.296801
150	2	F	20	0	NA	1	3	6	post-test	bilabial	10	PB4	10	PB4_10.wav	1	83.15033
150	2	F	20	0	NA	1	3	6	post-test	bilabial	11	PB4	7	PB4_7.wav	1	61.574059
150	2	F	20	0	NA	1	3	6	post-test	bilabial	12	PB4	8	PB4_8.wav	1	2.717804
150	2	F	20	0	NA	1	3	6	post-test	velar	13	KG4	2	KG4_2.wav	0	349.958477
150	2	F	20	0	NA	1	3	6	post-test	velar	14	KG4	7	KG4_7.wav	1	99.54261
150	2	F	20	0	NA	1	3	6	post-test	velar	15	KG4	6	KG4_6.wav	0	101.84035
150	2	F	20	0	NA	1	3	6	post-test	velar	16	KG4	5	KG4_5.wav	0	127.333119
150	2	F	20	0	NA	1	3	6	post-test	velar	17	KG4	3	KG4_3.wav	0	15.755856
150	2	F	20	0	NA	1	3	6	post-test	velar	18	KG4	10	KG4_10.wav	1	18.278171
150	2	F	20	0	NA	1	3	6	post-test	velar	19	KG4	11	KG4_11.wav	1	429.780206
150	2	F	20	0	NA	1	3	6	post-test	velar	20	KG4	1	KG4_1.wav	0	130.742438
150	2	F	20	0	NA	1	3	6	post-test	velar	21	KG4	9	KG4_9.wav	1	147.538366
150	2	F	20	0	NA	1	3	6	post-test	velar	22	KG4	8	KG4_8.wav	1	129.301485
150	2	F	20	0	NA	1	3	6	post-test	velar	23	KG4	12	KG4_12.wav	1	81.343727
150	2	F	20	0	NA	1	3	6	post-test	velar	24	KG4	4	KG4_4.wav	0	47.179105
150	2	F	20	0	NA	1	3	6	post-test	bilabial	25	PB5	7	PB5_7.wav	1	615.944659
150	2	F	20	0	NA	1	3	6	post-test	bilabial	26	PB5	9	PB5_9.wav	1	127.810437
150	2	F	20	0	NA	1	3	6	post-test	bilabial	27	PB5	12	PB5_12.wav	1	89.527205
150	2	F	20	0	NA	1	3	6	post-test	bilabial	28	PB5	4	PB5_4.wav	0	86.302681
150	2	F	20	0	NA	1	3	6	post-test	bilabial	29	PB5	3	PB5_3.wav	0	84.427544
150	2	F	20	0	NA	1	3	6	post-test	bilabial	30	PB5	1	PB5_1.wav	0	79.622595
150	2	F	20	0	NA	1	3	6	post-test	bilabial	31	PB5	2	PB5_2.wav	0	173.076078
150	2	F	20	0	NA	1	3	6	post-test	bilabial	32	PB5	10	PB5_10.wav	1	205.290313
150	2	F	20	0	NA	1	3	6	post-test	bilabial	33	PB5	11	PB5_11.wav	1	184.761516
150	2	F	20	0	NA	1	3	6	post-test	bilabial	34	PB5	5	PB5_5.wav	0	157.419555
150	2	F	20	0	NA	1	3	6	post-test	bilabial	35	PB5	6	PB5_6.wav	0	719.477353
150	2	F	20	0	NA	1	3	6	post-test	bilabial	36	PB5	8	PB5_8.wav	1	153.545294
150	2	F	20	0	NA	1	3	6	post-test	velar	37	KG5	9	KG5_9.wav	1	581.525975
150	2	F	20	0	NA	1	3	6	post-test	velar	38	KG5	2	KG5_2.wav	0	16.491494
150	2	F	20	0	NA	1	3	6	post-test	velar	39	KG5	12	KG5_12.wav	1	11.885375
150	2	F	20	0	NA	1	3	6	post-test	velar	40	KG5	11	KG5_11.wav	1	65.326743
150	2	F	20	0	NA	1	3	6	post-test	velar	41	KG5	4	KG5_4.wav	0	0.03441
150	2	F	20	0	NA	1	3	6	post-test	velar	42	KG5	10	KG5_10.wav	1	32.600046
150	2	F	20	0	NA	1	3	6	post-test	velar	43	KG5	5	KG5_5.wav	0	9.80805
150	2	F	20	0	NA	1	3	6	post-test	velar	44	KG5	6	KG5_6.wav	0	59.852292
150	2	F	20	0	NA	1	3	6	post-test	velar	45	KG5	7	KG5_7.wav	1	729.426826
150	2	F	20	0	NA	1	3	6	post-test	velar	46	KG5	1	KG5_1.wav	0	63.4973
150	2	F	20	0	NA	1	3	6	post-test	velar	47	KG5	3	KG5_3.wav	0	78.283123
150	2	F	20	0	NA	1	3	6	post-test	velar	48	KG5	8	KG5_8.wav	1	4.176122
150	2	F	20	0	NA	1	3	6	post-test	bilabial	49	PB6	10	PB6_10.wav	1	201.223811
150	2	F	20	0	NA	1	3	6	post-test	bilabial	50	PB6	8	PB6_8.wav	1	95.53866
150	2	F	20	0	NA	1	3	6	post-test	bilabial	51	PB6	9	PB6_9.wav	1	42.176029
150	2	F	20	0	NA	1	3	6	post-test	bilabial	52	PB6	5	PB6_5.wav	0	387.692546
150	2	F	20	0	NA	1	3	6	post-test	bilabial	53	PB6	7	PB6_7.wav	1	191.707869
150	2	F	20	0	NA	1	3	6	post-test	bilabial	54	PB6	1	PB6_1.wav	0	128.036172
150	2	F	20	0	NA	1	3	6	post-test	bilabial	55	PB6	11	PB6_11.wav	1	71.980328
150	2	F	20	0	NA	1	3	6	post-test	bilabial	56	PB6	12	PB6_12.wav	1	149.45737
150	2	F	20	0	NA	1	3	6	post-test	bilabial	57	PB6	3	PB6_3.wav	0	76.949505
150	2	F	20	0	NA	1	3	6	post-test	bilabial	58	PB6	4	PB6_4.wav	0	37.292876
150	2	F	20	0	NA	1	3	6	post-test	bilabial	59	PB6	6	PB6_6.wav	1	119.16815
150	2	F	20	0	NA	1	3	6	post-test	bilabial	60	PB6	2	PB6_2.wav	0	113.97586
150	2	F	20	0	NA	1	3	6	post-test	velar	61	KG6	2	KG6_2.wav	0	253.121032
150	2	F	20	0	NA	1	3	6	post-test	velar	62	KG6	9	KG6_9.wav	1	93.942196
150	2	F	20	0	NA	1	3	6	post-test	velar	63	KG6	3	KG6_3.wav	0	14.295324
150	2	F	20	0	NA	1	3	6	post-test	velar	64	KG6	8	KG6_8.wav	1	285.575843
150	2	F	20	0	NA	1	3	6	post-test	velar	65	KG6	5	KG6_5.wav	0	466.917869
150	2	F	20	0	NA	1	3	6	post-test	velar	66	KG6	12	KG6_12.wav	1	83.611042
150	2	F	20	0	NA	1	3	6	post-test	velar	67	KG6	11	KG6_11.wav	1	553.791761
150	2	F	20	0	NA	1	3	6	post-test	velar	68	KG6	4	KG6_4.wav	0	158.921307
150	2	F	20	0	NA	1	3	6	post-test	velar	69	KG6	7	KG6_7.wav	0	145.860545
150	2	F	20	0	NA	1	3	6	post-test	velar	70	KG6	1	KG6_1.wav	0	208.353089
150	2	F	20	0	NA	1	3	6	post-test	velar	71	KG6	6	KG6_6.wav	0	98.032374
150	2	F	20	0	NA	1	3	6	post-test	velar	72	KG6	10	KG6_10.wav	1	50.284429
150	2	F	20	0	NA	1	3	7	pre-test	velar	1	KG1	12	KG1_12.wav	1	1895.988142
150	2	F	20	0	NA	1	3	7	pre-test	velar	2	KG1	6	KG1_6.wav	0	404.738414
150	2	F	20	0	NA	1	3	7	pre-test	velar	3	KG1	10	KG1_10.wav	1	385.225179
150	2	F	20	0	NA	1	3	7	pre-test	velar	4	KG1	1	KG1_1.wav	0	442.051797
150	2	F	20	0	NA	1	3	7	pre-test	velar	5	KG1	9	KG1_9.wav	1	254.036724
150	2	F	20	0	NA	1	3	7	pre-test	velar	6	KG1	8	KG1_8.wav	0	1428.011973
150	2	F	20	0	NA	1	3	7	pre-test	velar	7	KG1	7	KG1_7.wav	0	578.644182
150	2	F	20	0	NA	1	3	7	pre-test	velar	8	KG1	2	KG1_2.wav	0	146.977551
150	2	F	20	0	NA	1	3	7	pre-test	velar	9	KG1	4	KG1_4.wav	0	69.381571
150	2	F	20	0	NA	1	3	7	pre-test	velar	10	KG1	3	KG1_3.wav	0	19.360936
150	2	F	20	0	NA	1	3	7	pre-test	velar	11	KG1	11	KG1_11.wav	1	453.177676
150	2	F	20	0	NA	1	3	7	pre-test	velar	12	KG1	5	KG1_5.wav	0	180.587751
150	2	F	20	0	NA	1	3	7	pre-test	bilabial	13	PB1	4	PB1_4.wav	0	394.12693
150	2	F	20	0	NA	1	3	7	pre-test	bilabial	14	PB1	9	PB1_9.wav	1	149.956037
150	2	F	20	0	NA	1	3	7	pre-test	bilabial	15	PB1	3	PB1_3.wav	0	87.423061
150	2	F	20	0	NA	1	3	7	pre-test	bilabial	16	PB1	12	PB1_12.wav	1	72.57538
150	2	F	20	0	NA	1	3	7	pre-test	bilabial	17	PB1	1	PB1_1.wav	0	98.898481
150	2	F	20	0	NA	1	3	7	pre-test	bilabial	18	PB1	11	PB1_11.wav	1	74.656989
150	2	F	20	0	NA	1	3	7	pre-test	bilabial	19	PB1	6	PB1_6.wav	0	574.252502
150	2	F	20	0	NA	1	3	7	pre-test	bilabial	20	PB1	8	PB1_8.wav	1	229.403854
150	2	F	20	0	NA	1	3	7	pre-test	bilabial	21	PB1	10	PB1_10.wav	1	128.9514
150	2	F	20	0	NA	1	3	7	pre-test	bilabial	22	PB1	7	PB1_7.wav	1	123.719878
150	2	F	20	0	NA	1	3	7	pre-test	bilabial	23	PB1	2	PB1_2.wav	0	123.897061
150	2	F	20	0	NA	1	3	7	pre-test	bilabial	24	PB1	5	PB1_5.wav	0	573.3925
150	2	F	20	0	NA	1	3	7	pre-test	velar	25	KG2	6	KG2_6.wav	0	729.286001
150	2	F	20	0	NA	1	3	7	pre-test	velar	26	KG2	10	KG2_10.wav	1	382.575404
150	2	F	20	0	NA	1	3	7	pre-test	velar	27	KG2	3	KG2_3.wav	0	109.582205
150	2	F	20	0	NA	1	3	7	pre-test	velar	28	KG2	7	KG2_7.wav	0	1034.780573
150	2	F	20	0	NA	1	3	7	pre-test	velar	29	KG2	9	KG2_9.wav	1	407.129213
150	2	F	20	0	NA	1	3	7	pre-test	velar	30	KG2	11	KG2_11.wav	1	133.320412
150	2	F	20	0	NA	1	3	7	pre-test	velar	31	KG2	2	KG2_2.wav	0	147.754356
150	2	F	20	0	NA	1	3	7	pre-test	velar	32	KG2	8	KG2_8.wav	1	148.592988
150	2	F	20	0	NA	1	3	7	pre-test	velar	33	KG2	12	KG2_12.wav	1	18.770032
150	2	F	20	0	NA	1	3	7	pre-test	velar	34	KG2	4	KG2_4.wav	0	7.109651
150	2	F	20	0	NA	1	3	7	pre-test	velar	35	KG2	1	KG2_1.wav	0	123.721344
150	2	F	20	0	NA	1	3	7	pre-test	velar	36	KG2	5	KG2_5.wav	0	139.24416
150	2	F	20	0	NA	1	3	7	pre-test	bilabial	37	PB2	7	PB2_7.wav	0	1145.053374
150	2	F	20	0	NA	1	3	7	pre-test	bilabial	38	PB2	8	PB2_8.wav	0	262.341527
150	2	F	20	0	NA	1	3	7	pre-test	bilabial	39	PB2	5	PB2_5.wav	0	178.180712
150	2	F	20	0	NA	1	3	7	pre-test	bilabial	40	PB2	6	PB2_6.wav	0	1534.130549
150	2	F	20	0	NA	1	3	7	pre-test	bilabial	41	PB2	11	PB2_11.wav	1	126.062145
150	2	F	20	0	NA	1	3	7	pre-test	bilabial	42	PB2	3	PB2_3.wav	0	292.663259
150	2	F	20	0	NA	1	3	7	pre-test	bilabial	43	PB2	4	PB2_4.wav	0	150.066213
150	2	F	20	0	NA	1	3	7	pre-test	bilabial	44	PB2	2	PB2_2.wav	0	134.531056
150	2	F	20	0	NA	1	3	7	pre-test	bilabial	45	PB2	12	PB2_12.wav	1	107.732072
150	2	F	20	0	NA	1	3	7	pre-test	bilabial	46	PB2	1	PB2_1.wav	0	397.89246
150	2	F	20	0	NA	1	3	7	pre-test	bilabial	47	PB2	10	PB2_10.wav	1	162.079718
150	2	F	20	0	NA	1	3	7	pre-test	bilabial	48	PB2	9	PB2_9.wav	1	358.544095
150	2	F	20	0	NA	1	3	7	pre-test	velar	49	KG3	1	KG3_1.wav	0	419.332438
150	2	F	20	0	NA	1	3	7	pre-test	velar	50	KG3	7	KG3_7.wav	1	296.2281
150	2	F	20	0	NA	1	3	7	pre-test	velar	51	KG3	3	KG3_3.wav	0	125.825278
150	2	F	20	0	NA	1	3	7	pre-test	velar	52	KG3	12	KG3_12.wav	1	93.209141
150	2	F	20	0	NA	1	3	7	pre-test	velar	53	KG3	11	KG3_11.wav	1	101.942936
150	2	F	20	0	NA	1	3	7	pre-test	velar	54	KG3	10	KG3_10.wav	1	117.725671
150	2	F	20	0	NA	1	3	7	pre-test	velar	55	KG3	6	KG3_6.wav	0	236.070588
150	2	F	20	0	NA	1	3	7	pre-test	velar	56	KG3	8	KG3_8.wav	1	112.040957
150	2	F	20	0	NA	1	3	7	pre-test	velar	57	KG3	9	KG3_9.wav	1	52.205861
150	2	F	20	0	NA	1	3	7	pre-test	velar	58	KG3	5	KG3_5.wav	0	92.637253
150	2	F	20	0	NA	1	3	7	pre-test	velar	59	KG3	2	KG3_2.wav	0	49.540041
150	2	F	20	0	NA	1	3	7	pre-test	velar	60	KG3	4	KG3_4.wav	0	100.533454
150	2	F	20	0	NA	1	3	7	pre-test	bilabial	61	PB3	6	PB3_6.wav	0	354.248037
150	2	F	20	0	NA	1	3	7	pre-test	bilabial	62	PB3	11	PB3_11.wav	1	207.887317
150	2	F	20	0	NA	1	3	7	pre-test	bilabial	63	PB3	3	PB3_3.wav	0	115.539628
150	2	F	20	0	NA	1	3	7	pre-test	bilabial	64	PB3	12	PB3_12.wav	1	147.090764
150	2	F	20	0	NA	1	3	7	pre-test	bilabial	65	PB3	10	PB3_10.wav	1	308.712591
150	2	F	20	0	NA	1	3	7	pre-test	bilabial	66	PB3	1	PB3_1.wav	0	129.040563
150	2	F	20	0	NA	1	3	7	pre-test	bilabial	67	PB3	4	PB3_4.wav	0	116.101553
150	2	F	20	0	NA	1	3	7	pre-test	bilabial	68	PB3	7	PB3_7.wav	1	272.340722
150	2	F	20	0	NA	1	3	7	pre-test	bilabial	69	PB3	5	PB3_5.wav	0	126.638762
150	2	F	20	0	NA	1	3	7	pre-test	bilabial	70	PB3	8	PB3_8.wav	1	582.940766
150	2	F	20	0	NA	1	3	7	pre-test	bilabial	71	PB3	9	PB3_9.wav	1	129.077806
150	2	F	20	0	NA	1	3	7	pre-test	bilabial	72	PB3	2	PB3_2.wav	0	139.528761
150	2	F	20	0	NA	1	4	8	post-test	bilabial	1	PB4	12	PB4_12.wav	1	516.088426
150	2	F	20	0	NA	1	4	8	post-test	bilabial	2	PB4	4	PB4_4.wav	0	166.977314
150	2	F	20	0	NA	1	4	8	post-test	bilabial	3	PB4	3	PB4_3.wav	0	54.685696
150	2	F	20	0	NA	1	4	8	post-test	bilabial	4	PB4	8	PB4_8.wav	1	16.469709
150	2	F	20	0	NA	1	4	8	post-test	bilabial	5	PB4	5	PB4_5.wav	0	66.631133
150	2	F	20	0	NA	1	4	8	post-test	bilabial	6	PB4	9	PB4_9.wav	1	32.029008
150	2	F	20	0	NA	1	4	8	post-test	bilabial	7	PB4	7	PB4_7.wav	1	302.133149
150	2	F	20	0	NA	1	4	8	post-test	bilabial	8	PB4	10	PB4_10.wav	1	185.417308
150	2	F	20	0	NA	1	4	8	post-test	bilabial	9	PB4	2	PB4_2.wav	0	88.276558
150	2	F	20	0	NA	1	4	8	post-test	bilabial	10	PB4	1	PB4_1.wav	0	63.363497
150	2	F	20	0	NA	1	4	8	post-test	bilabial	11	PB4	11	PB4_11.wav	1	81.368305
150	2	F	20	0	NA	1	4	8	post-test	bilabial	12	PB4	6	PB4_6.wav	0	71.876969
150	2	F	20	0	NA	1	4	8	post-test	velar	13	KG4	4	KG4_4.wav	0	352.026238
150	2	F	20	0	NA	1	4	8	post-test	velar	14	KG4	11	KG4_11.wav	1	124.531924
150	2	F	20	0	NA	1	4	8	post-test	velar	15	KG4	3	KG4_3.wav	0	49.058184
150	2	F	20	0	NA	1	4	8	post-test	velar	16	KG4	12	KG4_12.wav	1	493.981215
150	2	F	20	0	NA	1	4	8	post-test	velar	17	KG4	1	KG4_1.wav	0	65.043385
150	2	F	20	0	NA	1	4	8	post-test	velar	18	KG4	7	KG4_7.wav	0	531.335598
150	2	F	20	0	NA	1	4	8	post-test	velar	19	KG4	10	KG4_10.wav	1	113.669222
150	2	F	20	0	NA	1	4	8	post-test	velar	20	KG4	2	KG4_2.wav	0	214.326333
150	2	F	20	0	NA	1	4	8	post-test	velar	21	KG4	5	KG4_5.wav	0	158.620862
150	2	F	20	0	NA	1	4	8	post-test	velar	22	KG4	9	KG4_9.wav	1	153.138394
150	2	F	20	0	NA	1	4	8	post-test	velar	23	KG4	8	KG4_8.wav	1	146.916226
150	2	F	20	0	NA	1	4	8	post-test	velar	24	KG4	6	KG4_6.wav	0	926.70504
150	2	F	20	0	NA	1	4	8	post-test	bilabial	25	PB5	3	PB5_3.wav	0	284.41299
150	2	F	20	0	NA	1	4	8	post-test	bilabial	26	PB5	9	PB5_9.wav	1	320.667963
150	2	F	20	0	NA	1	4	8	post-test	bilabial	27	PB5	12	PB5_12.wav	1	250.827626
150	2	F	20	0	NA	1	4	8	post-test	bilabial	28	PB5	7	PB5_7.wav	0	304.535959
150	2	F	20	0	NA	1	4	8	post-test	bilabial	29	PB5	2	PB5_2.wav	0	187.429447
150	2	F	20	0	NA	1	4	8	post-test	bilabial	30	PB5	4	PB5_4.wav	0	189.611568
150	2	F	20	0	NA	1	4	8	post-test	bilabial	31	PB5	6	PB5_6.wav	0	260.881271
150	2	F	20	0	NA	1	4	8	post-test	bilabial	32	PB5	1	PB5_1.wav	0	188.175119
150	2	F	20	0	NA	1	4	8	post-test	bilabial	33	PB5	8	PB5_8.wav	1	124.561946
150	2	F	20	0	NA	1	4	8	post-test	bilabial	34	PB5	5	PB5_5.wav	0	240.870904
150	2	F	20	0	NA	1	4	8	post-test	bilabial	35	PB5	11	PB5_11.wav	1	174.711315
150	2	F	20	0	NA	1	4	8	post-test	bilabial	36	PB5	10	PB5_10.wav	1	126.869345
150	2	F	20	0	NA	1	4	8	post-test	velar	37	KG5	6	KG5_6.wav	0	153.537464
150	2	F	20	0	NA	1	4	8	post-test	velar	38	KG5	2	KG5_2.wav	0	1245.533612
150	2	F	20	0	NA	1	4	8	post-test	velar	39	KG5	4	KG5_4.wav	0	226.567708
150	2	F	20	0	NA	1	4	8	post-test	velar	40	KG5	12	KG5_12.wav	1	365.390555
150	2	F	20	0	NA	1	4	8	post-test	velar	41	KG5	7	KG5_7.wav	0	49.975264
150	2	F	20	0	NA	1	4	8	post-test	velar	42	KG5	10	KG5_10.wav	1	86.074435
150	2	F	20	0	NA	1	4	8	post-test	velar	43	KG5	8	KG5_8.wav	1	755.430657
150	2	F	20	0	NA	1	4	8	post-test	velar	44	KG5	5	KG5_5.wav	0	67.740605
150	2	F	20	0	NA	1	4	8	post-test	velar	45	KG5	9	KG5_9.wav	1	258.597069
150	2	F	20	0	NA	1	4	8	post-test	velar	46	KG5	1	KG5_1.wav	0	210.714685
150	2	F	20	0	NA	1	4	8	post-test	velar	47	KG5	3	KG5_3.wav	0	203.926817
150	2	F	20	0	NA	1	4	8	post-test	velar	48	KG5	11	KG5_11.wav	1	44.657702
150	2	F	20	0	NA	1	4	8	post-test	bilabial	49	PB6	2	PB6_2.wav	0	358.096735
150	2	F	20	0	NA	1	4	8	post-test	bilabial	50	PB6	9	PB6_9.wav	1	287.771494
150	2	F	20	0	NA	1	4	8	post-test	bilabial	51	PB6	6	PB6_6.wav	0	172.8043
150	2	F	20	0	NA	1	4	8	post-test	bilabial	52	PB6	8	PB6_8.wav	1	99.119906
150	2	F	20	0	NA	1	4	8	post-test	bilabial	53	PB6	1	PB6_1.wav	0	387.462368
150	2	F	20	0	NA	1	4	8	post-test	bilabial	54	PB6	10	PB6_10.wav	1	464.696012
150	2	F	20	0	NA	1	4	8	post-test	bilabial	55	PB6	3	PB6_3.wav	0	265.640944
150	2	F	20	0	NA	1	4	8	post-test	bilabial	56	PB6	4	PB6_4.wav	0	518.675296
150	2	F	20	0	NA	1	4	8	post-test	bilabial	57	PB6	12	PB6_12.wav	1	272.066559
150	2	F	20	0	NA	1	4	8	post-test	bilabial	58	PB6	7	PB6_7.wav	0	476.218315
150	2	F	20	0	NA	1	4	8	post-test	bilabial	59	PB6	5	PB6_5.wav	0	937.402099
150	2	F	20	0	NA	1	4	8	post-test	bilabial	60	PB6	11	PB6_11.wav	1	288.787698
150	2	F	20	0	NA	1	4	8	post-test	velar	61	KG6	9	KG6_9.wav	0	238.932511
150	2	F	20	0	NA	1	4	8	post-test	velar	62	KG6	10	KG6_10.wav	1	95.017868
150	2	F	20	0	NA	1	4	8	post-test	velar	63	KG6	4	KG6_4.wav	0	132.872157
150	2	F	20	0	NA	1	4	8	post-test	velar	64	KG6	12	KG6_12.wav	1	161.540961
150	2	F	20	0	NA	1	4	8	post-test	velar	65	KG6	11	KG6_11.wav	1	173.828938
150	2	F	20	0	NA	1	4	8	post-test	velar	66	KG6	1	KG6_1.wav	0	113.349077
150	2	F	20	0	NA	1	4	8	post-test	velar	67	KG6	6	KG6_6.wav	0	135.685886
150	2	F	20	0	NA	1	4	8	post-test	velar	68	KG6	8	KG6_8.wav	1	212.974792
150	2	F	20	0	NA	1	4	8	post-test	velar	69	KG6	2	KG6_2.wav	0	121.197271
150	2	F	20	0	NA	1	4	8	post-test	velar	70	KG6	3	KG6_3.wav	0	102.609929
150	2	F	20	0	NA	1	4	8	post-test	velar	71	KG6	7	KG6_7.wav	0	206.238655
150	2	F	20	0	NA	1	4	8	post-test	velar	72	KG6	5	KG6_5.wav	0	55.377487
150	2	F	20	0	NA	1	4	9	pre-test	velar	1	KG1	3	KG1_3.wav	0	344.883615
150	2	F	20	0	NA	1	4	9	pre-test	velar	2	KG1	4	KG1_4.wav	0	91.130952
150	2	F	20	0	NA	1	4	9	pre-test	velar	3	KG1	2	KG1_2.wav	0	187.183945
150	2	F	20	0	NA	1	4	9	pre-test	velar	4	KG1	6	KG1_6.wav	1	767.782619
150	2	F	20	0	NA	1	4	9	pre-test	velar	5	KG1	7	KG1_7.wav	1	168.518903
150	2	F	20	0	NA	1	4	9	pre-test	velar	6	KG1	8	KG1_8.wav	1	259.501179
150	2	F	20	0	NA	1	4	9	pre-test	velar	7	KG1	11	KG1_11.wav	1	52.772632
150	2	F	20	0	NA	1	4	9	pre-test	velar	8	KG1	10	KG1_10.wav	1	23.635867
150	2	F	20	0	NA	1	4	9	pre-test	velar	9	KG1	5	KG1_5.wav	0	11.648304
150	2	F	20	0	NA	1	4	9	pre-test	velar	10	KG1	1	KG1_1.wav	0	469.776708
150	2	F	20	0	NA	1	4	9	pre-test	velar	11	KG1	12	KG1_12.wav	1	171.934044
150	2	F	20	0	NA	1	4	9	pre-test	velar	12	KG1	9	KG1_9.wav	1	585.357764
150	2	F	20	0	NA	1	4	9	pre-test	bilabial	13	PB1	1	PB1_1.wav	0	232.008344
150	2	F	20	0	NA	1	4	9	pre-test	bilabial	14	PB1	3	PB1_3.wav	0	204.783168
150	2	F	20	0	NA	1	4	9	pre-test	bilabial	15	PB1	2	PB1_2.wav	0	154.905408
150	2	F	20	0	NA	1	4	9	pre-test	bilabial	16	PB1	8	PB1_8.wav	1	178.434802
150	2	F	20	0	NA	1	4	9	pre-test	bilabial	17	PB1	12	PB1_12.wav	1	111.808866
150	2	F	20	0	NA	1	4	9	pre-test	bilabial	18	PB1	10	PB1_10.wav	1	72.805961
150	2	F	20	0	NA	1	4	9	pre-test	bilabial	19	PB1	11	PB1_11.wav	1	123.965542
150	2	F	20	0	NA	1	4	9	pre-test	bilabial	20	PB1	7	PB1_7.wav	1	459.736474
150	2	F	20	0	NA	1	4	9	pre-test	bilabial	21	PB1	9	PB1_9.wav	1	158.526619
150	2	F	20	0	NA	1	4	9	pre-test	bilabial	22	PB1	5	PB1_5.wav	0	270.346271
150	2	F	20	0	NA	1	4	9	pre-test	bilabial	23	PB1	6	PB1_6.wav	0	750.153549
150	2	F	20	0	NA	1	4	9	pre-test	bilabial	24	PB1	4	PB1_4.wav	0	145.229318
150	2	F	20	0	NA	1	4	9	pre-test	velar	25	KG2	10	KG2_10.wav	0	1230.245205
150	2	F	20	0	NA	1	4	9	pre-test	velar	26	KG2	3	KG2_3.wav	0	143.892982
150	2	F	20	0	NA	1	4	9	pre-test	velar	27	KG2	7	KG2_7.wav	0	63.792054
150	2	F	20	0	NA	1	4	9	pre-test	velar	28	KG2	8	KG2_8.wav	1	988.181015
150	2	F	20	0	NA	1	4	9	pre-test	velar	29	KG2	5	KG2_5.wav	0	100.8546
150	2	F	20	0	NA	1	4	9	pre-test	velar	30	KG2	6	KG2_6.wav	0	128.532684
150	2	F	20	0	NA	1	4	9	pre-test	velar	31	KG2	2	KG2_2.wav	0	401.949396
150	2	F	20	0	NA	1	4	9	pre-test	velar	32	KG2	12	KG2_12.wav	1	357.722228
150	2	F	20	0	NA	1	4	9	pre-test	velar	33	KG2	4	KG2_4.wav	0	109.699189
150	2	F	20	0	NA	1	4	9	pre-test	velar	34	KG2	9	KG2_9.wav	0	428.997047
150	2	F	20	0	NA	1	4	9	pre-test	velar	35	KG2	1	KG2_1.wav	0	231.338922
150	2	F	20	0	NA	1	4	9	pre-test	velar	36	KG2	11	KG2_11.wav	1	114.621194
150	2	F	20	0	NA	1	4	9	pre-test	bilabial	37	PB2	8	PB2_8.wav	1	1129.669025
150	2	F	20	0	NA	1	4	9	pre-test	bilabial	38	PB2	7	PB2_7.wav	0	240.36076
150	2	F	20	0	NA	1	4	9	pre-test	bilabial	39	PB2	9	PB2_9.wav	1	380.825002
150	2	F	20	0	NA	1	4	9	pre-test	bilabial	40	PB2	4	PB2_4.wav	0	272.558294
150	2	F	20	0	NA	1	4	9	pre-test	bilabial	41	PB2	10	PB2_10.wav	1	186.486445
150	2	F	20	0	NA	1	4	9	pre-test	bilabial	42	PB2	5	PB2_5.wav	0	235.654315
150	2	F	20	0	NA	1	4	9	pre-test	bilabial	43	PB2	11	PB2_11.wav	1	186.476501
150	2	F	20	0	NA	1	4	9	pre-test	bilabial	44	PB2	6	PB2_6.wav	0	119.028415
150	2	F	20	0	NA	1	4	9	pre-test	bilabial	45	PB2	12	PB2_12.wav	1	191.318441
150	2	F	20	0	NA	1	4	9	pre-test	bilabial	46	PB2	1	PB2_1.wav	0	428.495162
150	2	F	20	0	NA	1	4	9	pre-test	bilabial	47	PB2	2	PB2_2.wav	0	248.201634
150	2	F	20	0	NA	1	4	9	pre-test	bilabial	48	PB2	3	PB2_3.wav	0	195.77451
150	2	F	20	0	NA	1	4	9	pre-test	velar	49	KG3	7	KG3_7.wav	0	196.369692
150	2	F	20	0	NA	1	4	9	pre-test	velar	50	KG3	4	KG3_4.wav	0	114.800856
150	2	F	20	0	NA	1	4	9	pre-test	velar	51	KG3	6	KG3_6.wav	0	99.48256
150	2	F	20	0	NA	1	4	9	pre-test	velar	52	KG3	12	KG3_12.wav	1	64.447586
150	2	F	20	0	NA	1	4	9	pre-test	velar	53	KG3	11	KG3_11.wav	1	105.955468
150	2	F	20	0	NA	1	4	9	pre-test	velar	54	KG3	9	KG3_9.wav	1	194.058766
150	2	F	20	0	NA	1	4	9	pre-test	velar	55	KG3	3	KG3_3.wav	0	77.731543
150	2	F	20	0	NA	1	4	9	pre-test	velar	56	KG3	2	KG3_2.wav	0	88.43153
150	2	F	20	0	NA	1	4	9	pre-test	velar	57	KG3	8	KG3_8.wav	0	1009.519277
150	2	F	20	0	NA	1	4	9	pre-test	velar	58	KG3	5	KG3_5.wav	0	195.937248
150	2	F	20	0	NA	1	4	9	pre-test	velar	59	KG3	10	KG3_10.wav	1	186.387314
150	2	F	20	0	NA	1	4	9	pre-test	velar	60	KG3	1	KG3_1.wav	0	150.984418
150	2	F	20	0	NA	1	4	9	pre-test	bilabial	61	PB3	9	PB3_9.wav	1	260.870489
150	2	F	20	0	NA	1	4	9	pre-test	bilabial	62	PB3	1	PB3_1.wav	0	364.598901
150	2	F	20	0	NA	1	4	9	pre-test	bilabial	63	PB3	4	PB3_4.wav	0	206.307163
150	2	F	20	0	NA	1	4	9	pre-test	bilabial	64	PB3	6	PB3_6.wav	0	498.497621
150	2	F	20	0	NA	1	4	9	pre-test	bilabial	65	PB3	10	PB3_10.wav	1	136.52434
150	2	F	20	0	NA	1	4	9	pre-test	bilabial	66	PB3	5	PB3_5.wav	0	122.513615
150	2	F	20	0	NA	1	4	9	pre-test	bilabial	67	PB3	8	PB3_8.wav	1	203.607282
150	2	F	20	0	NA	1	4	9	pre-test	bilabial	68	PB3	12	PB3_12.wav	1	154.705743
150	2	F	20	0	NA	1	4	9	pre-test	bilabial	69	PB3	11	PB3_11.wav	1	118.419003
150	2	F	20	0	NA	1	4	9	pre-test	bilabial	70	PB3	3	PB3_3.wav	0	56.783733
150	2	F	20	0	NA	1	4	9	pre-test	bilabial	71	PB3	7	PB3_7.wav	0	426.211219
150	2	F	20	0	NA	1	4	9	pre-test	bilabial	72	PB3	2	PB3_2.wav	0	165.154198
150	2	F	20	0	NA	1	5	10	post-test	bilabial	1	PB4	2	PB4_2.wav	0	576.823674
150	2	F	20	0	NA	1	5	10	post-test	bilabial	2	PB4	1	PB4_1.wav	0	258.790352
150	2	F	20	0	NA	1	5	10	post-test	bilabial	3	PB4	8	PB4_8.wav	1	152.063351
150	2	F	20	0	NA	1	5	10	post-test	bilabial	4	PB4	3	PB4_3.wav	0	226.803854
150	2	F	20	0	NA	1	5	10	post-test	bilabial	5	PB4	6	PB4_6.wav	0	279.098975
150	2	F	20	0	NA	1	5	10	post-test	bilabial	6	PB4	11	PB4_11.wav	1	195.677526
150	2	F	20	0	NA	1	5	10	post-test	bilabial	7	PB4	12	PB4_12.wav	1	164.026685
150	2	F	20	0	NA	1	5	10	post-test	bilabial	8	PB4	4	PB4_4.wav	0	43.058819
150	2	F	20	0	NA	1	5	10	post-test	bilabial	9	PB4	7	PB4_7.wav	0	594.708517
150	2	F	20	0	NA	1	5	10	post-test	bilabial	10	PB4	5	PB4_5.wav	0	155.375929
150	2	F	20	0	NA	1	5	10	post-test	bilabial	11	PB4	9	PB4_9.wav	1	99.052836
150	2	F	20	0	NA	1	5	10	post-test	bilabial	12	PB4	10	PB4_10.wav	1	55.259939
150	2	F	20	0	NA	1	5	10	post-test	velar	13	KG4	10	KG4_10.wav	1	799.05155
150	2	F	20	0	NA	1	5	10	post-test	velar	14	KG4	2	KG4_2.wav	0	123.279548
150	2	F	20	0	NA	1	5	10	post-test	velar	15	KG4	12	KG4_12.wav	1	139.596114
150	2	F	20	0	NA	1	5	10	post-test	velar	16	KG4	7	KG4_7.wav	0	107.268034
150	2	F	20	0	NA	1	5	10	post-test	velar	17	KG4	6	KG4_6.wav	0	98.412295
150	2	F	20	0	NA	1	5	10	post-test	velar	18	KG4	5	KG4_5.wav	0	107.293891
150	2	F	20	0	NA	1	5	10	post-test	velar	19	KG4	9	KG4_9.wav	1	171.930418
150	2	F	20	0	NA	1	5	10	post-test	velar	20	KG4	1	KG4_1.wav	0	130.629209
150	2	F	20	0	NA	1	5	10	post-test	velar	21	KG4	3	KG4_3.wav	0	53.745727
150	2	F	20	0	NA	1	5	10	post-test	velar	22	KG4	4	KG4_4.wav	0	140.264524
150	2	F	20	0	NA	1	5	10	post-test	velar	23	KG4	11	KG4_11.wav	1	73.990366
150	2	F	20	0	NA	1	5	10	post-test	velar	24	KG4	8	KG4_8.wav	0	1285.559016
150	2	F	20	0	NA	1	5	10	post-test	bilabial	25	PB5	12	PB5_12.wav	1	296.518576
150	2	F	20	0	NA	1	5	10	post-test	bilabial	26	PB5	11	PB5_11.wav	1	199.520348
150	2	F	20	0	NA	1	5	10	post-test	bilabial	27	PB5	6	PB5_6.wav	0	92.304543
150	2	F	20	0	NA	1	5	10	post-test	bilabial	28	PB5	3	PB5_3.wav	0	63.265305
150	2	F	20	0	NA	1	5	10	post-test	bilabial	29	PB5	8	PB5_8.wav	1	118.329831
150	2	F	20	0	NA	1	5	10	post-test	bilabial	30	PB5	9	PB5_9.wav	1	80.799318
150	2	F	20	0	NA	1	5	10	post-test	bilabial	31	PB5	1	PB5_1.wav	0	143.629736
150	2	F	20	0	NA	1	5	10	post-test	bilabial	32	PB5	4	PB5_4.wav	0	104.780577
150	2	F	20	0	NA	1	5	10	post-test	bilabial	33	PB5	10	PB5_10.wav	1	195.5458
150	2	F	20	0	NA	1	5	10	post-test	bilabial	34	PB5	7	PB5_7.wav	0	1171.485733
150	2	F	20	0	NA	1	5	10	post-test	bilabial	35	PB5	5	PB5_5.wav	0	236.946376
150	2	F	20	0	NA	1	5	10	post-test	bilabial	36	PB5	2	PB5_2.wav	0	154.735838
150	2	F	20	0	NA	1	5	10	post-test	velar	37	KG5	3	KG5_3.wav	0	252.93402
150	2	F	20	0	NA	1	5	10	post-test	velar	38	KG5	7	KG5_7.wav	1	285.535669
150	2	F	20	0	NA	1	5	10	post-test	velar	39	KG5	6	KG5_6.wav	0	72.995262
150	2	F	20	0	NA	1	5	10	post-test	velar	40	KG5	4	KG5_4.wav	0	55.222936
150	2	F	20	0	NA	1	5	10	post-test	velar	41	KG5	2	KG5_2.wav	0	423.62316
150	2	F	20	0	NA	1	5	10	post-test	velar	42	KG5	11	KG5_11.wav	1	40.423847
150	2	F	20	0	NA	1	5	10	post-test	velar	43	KG5	9	KG5_9.wav	1	208.756806
150	2	F	20	0	NA	1	5	10	post-test	velar	44	KG5	5	KG5_5.wav	0	128.629023
150	2	F	20	0	NA	1	5	10	post-test	velar	45	KG5	1	KG5_1.wav	0	102.131564
150	2	F	20	0	NA	1	5	10	post-test	velar	46	KG5	10	KG5_10.wav	1	137.395179
150	2	F	20	0	NA	1	5	10	post-test	velar	47	KG5	8	KG5_8.wav	0	150.560444
150	2	F	20	0	NA	1	5	10	post-test	velar	48	KG5	12	KG5_12.wav	1	201.894441
150	2	F	20	0	NA	1	5	10	post-test	bilabial	49	PB6	4	PB6_4.wav	0	278.133543
150	2	F	20	0	NA	1	5	10	post-test	bilabial	50	PB6	2	PB6_2.wav	0	218.377575
150	2	F	20	0	NA	1	5	10	post-test	bilabial	51	PB6	9	PB6_9.wav	1	241.650937
150	2	F	20	0	NA	1	5	10	post-test	bilabial	52	PB6	11	PB6_11.wav	1	270.92563
150	2	F	20	0	NA	1	5	10	post-test	bilabial	53	PB6	3	PB6_3.wav	0	225.015279
150	2	F	20	0	NA	1	5	10	post-test	bilabial	54	PB6	12	PB6_12.wav	1	143.016041
150	2	F	20	0	NA	1	5	10	post-test	bilabial	55	PB6	5	PB6_5.wav	0	169.009505
150	2	F	20	0	NA	1	5	10	post-test	bilabial	56	PB6	1	PB6_1.wav	0	200.7048
150	2	F	20	0	NA	1	5	10	post-test	bilabial	57	PB6	6	PB6_6.wav	0	215.331444
150	2	F	20	0	NA	1	5	10	post-test	bilabial	58	PB6	8	PB6_8.wav	1	149.456355
150	2	F	20	0	NA	1	5	10	post-test	bilabial	59	PB6	10	PB6_10.wav	1	209.921525
150	2	F	20	0	NA	1	5	10	post-test	bilabial	60	PB6	7	PB6_7.wav	1	229.062022
150	2	F	20	0	NA	1	5	10	post-test	velar	61	KG6	12	KG6_12.wav	1	897.558683
150	2	F	20	0	NA	1	5	10	post-test	velar	62	KG6	3	KG6_3.wav	0	98.215963
150	2	F	20	0	NA	1	5	10	post-test	velar	63	KG6	7	KG6_7.wav	0	400.04223
150	2	F	20	0	NA	1	5	10	post-test	velar	64	KG6	10	KG6_10.wav	1	562.287279
150	2	F	20	0	NA	1	5	10	post-test	velar	65	KG6	9	KG6_9.wav	0	749.904064
150	2	F	20	0	NA	1	5	10	post-test	velar	66	KG6	4	KG6_4.wav	0	113.490036
150	2	F	20	0	NA	1	5	10	post-test	velar	67	KG6	6	KG6_6.wav	0	327.407321
150	2	F	20	0	NA	1	5	10	post-test	velar	68	KG6	1	KG6_1.wav	0	278.647887
150	2	F	20	0	NA	1	5	10	post-test	velar	69	KG6	2	KG6_2.wav	0	229.907769
150	2	F	20	0	NA	1	5	10	post-test	velar	70	KG6	5	KG6_5.wav	0	216.348495
150	2	F	20	0	NA	1	5	10	post-test	velar	71	KG6	11	KG6_11.wav	1	129.149965
150	2	F	20	0	NA	1	5	10	post-test	velar	72	KG6	8	KG6_8.wav	1	678.379081
150	2	F	20	0	NA	1	5	11	pre-test	velar	1	KG1	2	KG1_2.wav	0	501.044745
150	2	F	20	0	NA	1	5	11	pre-test	velar	2	KG1	12	KG1_12.wav	1	438.328102
150	2	F	20	0	NA	1	5	11	pre-test	velar	3	KG1	6	KG1_6.wav	0	324.916583
150	2	F	20	0	NA	1	5	11	pre-test	velar	4	KG1	11	KG1_11.wav	1	167.060935
150	2	F	20	0	NA	1	5	11	pre-test	velar	5	KG1	5	KG1_5.wav	0	110.075957
150	2	F	20	0	NA	1	5	11	pre-test	velar	6	KG1	4	KG1_4.wav	0	137.830872
150	2	F	20	0	NA	1	5	11	pre-test	velar	7	KG1	9	KG1_9.wav	1	107.282856
150	2	F	20	0	NA	1	5	11	pre-test	velar	8	KG1	3	KG1_3.wav	0	84.91962
150	2	F	20	0	NA	1	5	11	pre-test	velar	9	KG1	7	KG1_7.wav	1	187.514044
150	2	F	20	0	NA	1	5	11	pre-test	velar	10	KG1	10	KG1_10.wav	1	49.302375
150	2	F	20	0	NA	1	5	11	pre-test	velar	11	KG1	8	KG1_8.wav	1	324.941477
150	2	F	20	0	NA	1	5	11	pre-test	velar	12	KG1	1	KG1_1.wav	0	176.372062
150	2	F	20	0	NA	1	5	11	pre-test	bilabial	13	PB1	7	PB1_7.wav	1	229.930513
150	2	F	20	0	NA	1	5	11	pre-test	bilabial	14	PB1	1	PB1_1.wav	0	113.172543
150	2	F	20	0	NA	1	5	11	pre-test	bilabial	15	PB1	6	PB1_6.wav	1	1187.233401
150	2	F	20	0	NA	1	5	11	pre-test	bilabial	16	PB1	2	PB1_2.wav	0	187.461298
150	2	F	20	0	NA	1	5	11	pre-test	bilabial	17	PB1	11	PB1_11.wav	1	121.50497
150	2	F	20	0	NA	1	5	11	pre-test	bilabial	18	PB1	4	PB1_4.wav	0	109.40698
150	2	F	20	0	NA	1	5	11	pre-test	bilabial	19	PB1	8	PB1_8.wav	1	67.056933
150	2	F	20	0	NA	1	5	11	pre-test	bilabial	20	PB1	3	PB1_3.wav	0	44.639992
150	2	F	20	0	NA	1	5	11	pre-test	bilabial	21	PB1	10	PB1_10.wav	1	816.389028
150	2	F	20	0	NA	1	5	11	pre-test	bilabial	22	PB1	5	PB1_5.wav	0	199.635197
150	2	F	20	0	NA	1	5	11	pre-test	bilabial	23	PB1	9	PB1_9.wav	1	378.620578
150	2	F	20	0	NA	1	5	11	pre-test	bilabial	24	PB1	12	PB1_12.wav	1	234.379542
150	2	F	20	0	NA	1	5	11	pre-test	velar	25	KG2	9	KG2_9.wav	1	500.816665
150	2	F	20	0	NA	1	5	11	pre-test	velar	26	KG2	7	KG2_7.wav	1	1085.412906
150	2	F	20	0	NA	1	5	11	pre-test	velar	27	KG2	4	KG2_4.wav	0	183.754733
150	2	F	20	0	NA	1	5	11	pre-test	velar	28	KG2	5	KG2_5.wav	0	115.769275
150	2	F	20	0	NA	1	5	11	pre-test	velar	29	KG2	1	KG2_1.wav	0	126.791127
150	2	F	20	0	NA	1	5	11	pre-test	velar	30	KG2	12	KG2_12.wav	1	128.799429
150	2	F	20	0	NA	1	5	11	pre-test	velar	31	KG2	2	KG2_2.wav	0	68.236955
150	2	F	20	0	NA	1	5	11	pre-test	velar	32	KG2	6	KG2_6.wav	0	112.129966
150	2	F	20	0	NA	1	5	11	pre-test	velar	33	KG2	10	KG2_10.wav	1	111.417522
150	2	F	20	0	NA	1	5	11	pre-test	velar	34	KG2	11	KG2_11.wav	1	77.354102
150	2	F	20	0	NA	1	5	11	pre-test	velar	35	KG2	3	KG2_3.wav	0	95.597819
150	2	F	20	0	NA	1	5	11	pre-test	velar	36	KG2	8	KG2_8.wav	1	321.805378
150	2	F	20	0	NA	1	5	11	pre-test	bilabial	37	PB2	11	PB2_11.wav	1	262.109468
150	2	F	20	0	NA	1	5	11	pre-test	bilabial	38	PB2	2	PB2_2.wav	0	145.974328
150	2	F	20	0	NA	1	5	11	pre-test	bilabial	39	PB2	5	PB2_5.wav	0	442.212836
150	2	F	20	0	NA	1	5	11	pre-test	bilabial	40	PB2	6	PB2_6.wav	0	284.456809
150	2	F	20	0	NA	1	5	11	pre-test	bilabial	41	PB2	8	PB2_8.wav	1	213.158369
150	2	F	20	0	NA	1	5	11	pre-test	bilabial	42	PB2	1	PB2_1.wav	0	137.572602
150	2	F	20	0	NA	1	5	11	pre-test	bilabial	43	PB2	7	PB2_7.wav	1	160.783755
150	2	F	20	0	NA	1	5	11	pre-test	bilabial	44	PB2	4	PB2_4.wav	0	142.61602
150	2	F	20	0	NA	1	5	11	pre-test	bilabial	45	PB2	12	PB2_12.wav	1	134.331014
150	2	F	20	0	NA	1	5	11	pre-test	bilabial	46	PB2	10	PB2_10.wav	1	212.127713
150	2	F	20	0	NA	1	5	11	pre-test	bilabial	47	PB2	9	PB2_9.wav	1	177.335413
150	2	F	20	0	NA	1	5	11	pre-test	bilabial	48	PB2	3	PB2_3.wav	0	119.678331
150	2	F	20	0	NA	1	5	11	pre-test	velar	49	KG3	10	KG3_10.wav	1	348.6705
150	2	F	20	0	NA	1	5	11	pre-test	velar	50	KG3	5	KG3_5.wav	0	165.582177
150	2	F	20	0	NA	1	5	11	pre-test	velar	51	KG3	9	KG3_9.wav	1	42.787458
150	2	F	20	0	NA	1	5	11	pre-test	velar	52	KG3	3	KG3_3.wav	0	76.120359
150	2	F	20	0	NA	1	5	11	pre-test	velar	53	KG3	1	KG3_1.wav	0	94.394642
150	2	F	20	0	NA	1	5	11	pre-test	velar	54	KG3	2	KG3_2.wav	0	88.175575
150	2	F	20	0	NA	1	5	11	pre-test	velar	55	KG3	7	KG3_7.wav	0	368.409209
150	2	F	20	0	NA	1	5	11	pre-test	velar	56	KG3	4	KG3_4.wav	0	102.51732
150	2	F	20	0	NA	1	5	11	pre-test	velar	57	KG3	12	KG3_12.wav	1	93.949147
150	2	F	20	0	NA	1	5	11	pre-test	velar	58	KG3	11	KG3_11.wav	1	109.235573
150	2	F	20	0	NA	1	5	11	pre-test	velar	59	KG3	6	KG3_6.wav	0	95.488229
150	2	F	20	0	NA	1	5	11	pre-test	velar	60	KG3	8	KG3_8.wav	0	139.444764
150	2	F	20	0	NA	1	5	11	pre-test	bilabial	61	PB3	1	PB3_1.wav	0	397.754749
150	2	F	20	0	NA	1	5	11	pre-test	bilabial	62	PB3	5	PB3_5.wav	0	254.283493
150	2	F	20	0	NA	1	5	11	pre-test	bilabial	63	PB3	9	PB3_9.wav	1	122.525592
150	2	F	20	0	NA	1	5	11	pre-test	bilabial	64	PB3	11	PB3_11.wav	1	148.629511
150	2	F	20	0	NA	1	5	11	pre-test	bilabial	65	PB3	6	PB3_6.wav	0	110.002046
150	2	F	20	0	NA	1	5	11	pre-test	bilabial	66	PB3	12	PB3_12.wav	1	328.657785
150	2	F	20	0	NA	1	5	11	pre-test	bilabial	67	PB3	10	PB3_10.wav	1	211.803984
150	2	F	20	0	NA	1	5	11	pre-test	bilabial	68	PB3	8	PB3_8.wav	1	690.322166
150	2	F	20	0	NA	1	5	11	pre-test	bilabial	69	PB3	3	PB3_3.wav	0	207.44363
150	2	F	20	0	NA	1	5	11	pre-test	bilabial	70	PB3	2	PB3_2.wav	0	295.847326
150	2	F	20	0	NA	1	5	11	pre-test	bilabial	71	PB3	4	PB3_4.wav	0	195.627943
150	2	F	20	0	NA	1	5	11	pre-test	bilabial	72	PB3	7	PB3_7.wav	1	476.070216
150	2	F	20	0	NA	1	6	12	post-test	bilabial	1	PB4	12	PB4_12.wav	1	442.84772
150	2	F	20	0	NA	1	6	12	post-test	bilabial	2	PB4	5	PB4_5.wav	0	184.004475
150	2	F	20	0	NA	1	6	12	post-test	bilabial	3	PB4	9	PB4_9.wav	1	74.844182
150	2	F	20	0	NA	1	6	12	post-test	bilabial	4	PB4	3	PB4_3.wav	0	155.68251
150	2	F	20	0	NA	1	6	12	post-test	bilabial	5	PB4	6	PB4_6.wav	0	85.616913
150	2	F	20	0	NA	1	6	12	post-test	bilabial	6	PB4	4	PB4_4.wav	0	80.893173
150	2	F	20	0	NA	1	6	12	post-test	bilabial	7	PB4	1	PB4_1.wav	0	133.128166
150	2	F	20	0	NA	1	6	12	post-test	bilabial	8	PB4	2	PB4_2.wav	0	152.027308
150	2	F	20	0	NA	1	6	12	post-test	bilabial	9	PB4	7	PB4_7.wav	1	203.041997
150	2	F	20	0	NA	1	6	12	post-test	bilabial	10	PB4	10	PB4_10.wav	1	160.435046
150	2	F	20	0	NA	1	6	12	post-test	bilabial	11	PB4	11	PB4_11.wav	1	179.317504
150	2	F	20	0	NA	1	6	12	post-test	bilabial	12	PB4	8	PB4_8.wav	1	1108.347301
150	2	F	20	0	NA	1	6	12	post-test	velar	13	KG4	11	KG4_11.wav	1	341.488382
150	2	F	20	0	NA	1	6	12	post-test	velar	14	KG4	2	KG4_2.wav	0	113.510717
150	2	F	20	0	NA	1	6	12	post-test	velar	15	KG4	10	KG4_10.wav	1	140.443739
150	2	F	20	0	NA	1	6	12	post-test	velar	16	KG4	9	KG4_9.wav	1	673.553479
150	2	F	20	0	NA	1	6	12	post-test	velar	17	KG4	5	KG4_5.wav	0	185.862684
150	2	F	20	0	NA	1	6	12	post-test	velar	18	KG4	3	KG4_3.wav	0	94.814488
150	2	F	20	0	NA	1	6	12	post-test	velar	19	KG4	6	KG4_6.wav	0	632.875254
150	2	F	20	0	NA	1	6	12	post-test	velar	20	KG4	12	KG4_12.wav	1	243.628233
150	2	F	20	0	NA	1	6	12	post-test	velar	21	KG4	1	KG4_1.wav	0	117.930008
150	2	F	20	0	NA	1	6	12	post-test	velar	22	KG4	7	KG4_7.wav	0	125.936515
150	2	F	20	0	NA	1	6	12	post-test	velar	23	KG4	8	KG4_8.wav	1	110.589409
150	2	F	20	0	NA	1	6	12	post-test	velar	24	KG4	4	KG4_4.wav	0	614.195342
150	2	F	20	0	NA	1	6	12	post-test	bilabial	25	PB5	12	PB5_12.wav	1	212.04774
150	2	F	20	0	NA	1	6	12	post-test	bilabial	26	PB5	10	PB5_10.wav	1	246.882803
150	2	F	20	0	NA	1	6	12	post-test	bilabial	27	PB5	3	PB5_3.wav	0	289.001987
150	2	F	20	0	NA	1	6	12	post-test	bilabial	28	PB5	8	PB5_8.wav	1	239.250276
150	2	F	20	0	NA	1	6	12	post-test	bilabial	29	PB5	4	PB5_4.wav	0	229.980157
150	2	F	20	0	NA	1	6	12	post-test	bilabial	30	PB5	5	PB5_5.wav	0	259.033731
150	2	F	20	0	NA	1	6	12	post-test	bilabial	31	PB5	6	PB5_6.wav	0	211.840324
150	2	F	20	0	NA	1	6	12	post-test	bilabial	32	PB5	7	PB5_7.wav	0	243.568165
150	2	F	20	0	NA	1	6	12	post-test	bilabial	33	PB5	11	PB5_11.wav	1	168.709396
150	2	F	20	0	NA	1	6	12	post-test	bilabial	34	PB5	2	PB5_2.wav	0	265.30148
150	2	F	20	0	NA	1	6	12	post-test	bilabial	35	PB5	9	PB5_9.wav	1	127.785687
150	2	F	20	0	NA	1	6	12	post-test	bilabial	36	PB5	1	PB5_1.wav	0	210.281078
150	2	F	20	0	NA	1	6	12	post-test	velar	37	KG5	1	KG5_1.wav	0	42.049423
150	2	F	20	0	NA	1	6	12	post-test	velar	38	KG5	2	KG5_2.wav	0	417.368028
150	2	F	20	0	NA	1	6	12	post-test	velar	39	KG5	12	KG5_12.wav	1	147.233113
150	2	F	20	0	NA	1	6	12	post-test	velar	40	KG5	7	KG5_7.wav	0	70.08779
150	2	F	20	0	NA	1	6	12	post-test	velar	41	KG5	9	KG5_9.wav	1	135.452821
150	2	F	20	0	NA	1	6	12	post-test	velar	42	KG5	3	KG5_3.wav	0	137.133802
150	2	F	20	0	NA	1	6	12	post-test	velar	43	KG5	6	KG5_6.wav	0	398.648946
150	2	F	20	0	NA	1	6	12	post-test	velar	44	KG5	4	KG5_4.wav	0	241.322386
150	2	F	20	0	NA	1	6	12	post-test	velar	45	KG5	11	KG5_11.wav	1	151.11166
150	2	F	20	0	NA	1	6	12	post-test	velar	46	KG5	5	KG5_5.wav	0	156.728655
150	2	F	20	0	NA	1	6	12	post-test	velar	47	KG5	10	KG5_10.wav	1	152.410194
150	2	F	20	0	NA	1	6	12	post-test	velar	48	KG5	8	KG5_8.wav	1	650.884891
150	2	F	20	0	NA	1	6	12	post-test	bilabial	49	PB6	11	PB6_11.wav	1	278.330784
150	2	F	20	0	NA	1	6	12	post-test	bilabial	50	PB6	12	PB6_12.wav	1	236.642117
150	2	F	20	0	NA	1	6	12	post-test	bilabial	51	PB6	4	PB6_4.wav	0	238.000069
150	2	F	20	0	NA	1	6	12	post-test	bilabial	52	PB6	9	PB6_9.wav	1	287.740182
150	2	F	20	0	NA	1	6	12	post-test	bilabial	53	PB6	2	PB6_2.wav	0	263.528418
150	2	F	20	0	NA	1	6	12	post-test	bilabial	54	PB6	1	PB6_1.wav	0	212.797651
150	2	F	20	0	NA	1	6	12	post-test	bilabial	55	PB6	7	PB6_7.wav	0	413.261948
150	2	F	20	0	NA	1	6	12	post-test	bilabial	56	PB6	3	PB6_3.wav	0	277.755385
150	2	F	20	0	NA	1	6	12	post-test	bilabial	57	PB6	6	PB6_6.wav	0	567.091038
150	2	F	20	0	NA	1	6	12	post-test	bilabial	58	PB6	10	PB6_10.wav	1	209.849832
150	2	F	20	0	NA	1	6	12	post-test	bilabial	59	PB6	8	PB6_8.wav	1	282.430252
150	2	F	20	0	NA	1	6	12	post-test	bilabial	60	PB6	5	PB6_5.wav	0	418.08691
150	2	F	20	0	NA	1	6	12	post-test	velar	61	KG6	9	KG6_9.wav	1	518.619818
150	2	F	20	0	NA	1	6	12	post-test	velar	62	KG6	7	KG6_7.wav	0	159.264329
150	2	F	20	0	NA	1	6	12	post-test	velar	63	KG6	1	KG6_1.wav	0	42.033371
150	2	F	20	0	NA	1	6	12	post-test	velar	64	KG6	3	KG6_3.wav	0	171.071332
150	2	F	20	0	NA	1	6	12	post-test	velar	65	KG6	8	KG6_8.wav	0	229.750153
150	2	F	20	0	NA	1	6	12	post-test	velar	66	KG6	4	KG6_4.wav	0	121.494502
150	2	F	20	0	NA	1	6	12	post-test	velar	67	KG6	6	KG6_6.wav	0	150.263492
150	2	F	20	0	NA	1	6	12	post-test	velar	68	KG6	2	KG6_2.wav	0	115.370356
150	2	F	20	0	NA	1	6	12	post-test	velar	69	KG6	5	KG6_5.wav	0	81.135294
150	2	F	20	0	NA	1	6	12	post-test	velar	70	KG6	11	KG6_11.wav	1	654.290335
150	2	F	20	0	NA	1	6	12	post-test	velar	71	KG6	12	KG6_12.wav	1	165.503021
150	2	F	20	0	NA	1	6	12	post-test	velar	72	KG6	10	KG6_10.wav	1	361.364896
150	2	F	20	0	NA	1	6	13	pre-test	velar	1	KG1	8	KG1_8.wav	0	482.325793
150	2	F	20	0	NA	1	6	13	pre-test	velar	2	KG1	6	KG1_6.wav	0	211.255908
150	2	F	20	0	NA	1	6	13	pre-test	velar	3	KG1	10	KG1_10.wav	1	169.745414
150	2	F	20	0	NA	1	6	13	pre-test	velar	4	KG1	1	KG1_1.wav	0	168.510724
150	2	F	20	0	NA	1	6	13	pre-test	velar	5	KG1	9	KG1_9.wav	1	129.321289
150	2	F	20	0	NA	1	6	13	pre-test	velar	6	KG1	12	KG1_12.wav	1	204.420352
150	2	F	20	0	NA	1	6	13	pre-test	velar	7	KG1	2	KG1_2.wav	0	128.900316
150	2	F	20	0	NA	1	6	13	pre-test	velar	8	KG1	7	KG1_7.wav	0	149.091772
150	2	F	20	0	NA	1	6	13	pre-test	velar	9	KG1	5	KG1_5.wav	0	167.792922
150	2	F	20	0	NA	1	6	13	pre-test	velar	10	KG1	4	KG1_4.wav	0	139.318054
150	2	F	20	0	NA	1	6	13	pre-test	velar	11	KG1	11	KG1_11.wav	1	112.697599
150	2	F	20	0	NA	1	6	13	pre-test	velar	12	KG1	3	KG1_3.wav	0	165.26229
150	2	F	20	0	NA	1	6	13	pre-test	bilabial	13	PB1	8	PB1_8.wav	1	137.95051
150	2	F	20	0	NA	1	6	13	pre-test	bilabial	14	PB1	6	PB1_6.wav	1	109.668824
150	2	F	20	0	NA	1	6	13	pre-test	bilabial	15	PB1	3	PB1_3.wav	0	83.10396
150	2	F	20	0	NA	1	6	13	pre-test	bilabial	16	PB1	1	PB1_1.wav	0	86.928261
150	2	F	20	0	NA	1	6	13	pre-test	bilabial	17	PB1	7	PB1_7.wav	1	30.599631
150	2	F	20	0	NA	1	6	13	pre-test	bilabial	18	PB1	11	PB1_11.wav	1	44.534685
150	2	F	20	0	NA	1	6	13	pre-test	bilabial	19	PB1	9	PB1_9.wav	1	439.995774
150	2	F	20	0	NA	1	6	13	pre-test	bilabial	20	PB1	2	PB1_2.wav	0	183.043389
150	2	F	20	0	NA	1	6	13	pre-test	bilabial	21	PB1	12	PB1_12.wav	1	169.837554
150	2	F	20	0	NA	1	6	13	pre-test	bilabial	22	PB1	5	PB1_5.wav	0	122.591067
150	2	F	20	0	NA	1	6	13	pre-test	bilabial	23	PB1	10	PB1_10.wav	1	134.058562
150	2	F	20	0	NA	1	6	13	pre-test	bilabial	24	PB1	4	PB1_4.wav	0	114.491451
150	2	F	20	0	NA	1	6	13	pre-test	velar	25	KG2	9	KG2_9.wav	0	1504.545854
150	2	F	20	0	NA	1	6	13	pre-test	velar	26	KG2	1	KG2_1.wav	0	176.603761
150	2	F	20	0	NA	1	6	13	pre-test	velar	27	KG2	5	KG2_5.wav	0	99.331428
150	2	F	20	0	NA	1	6	13	pre-test	velar	28	KG2	10	KG2_10.wav	1	106.35156
150	2	F	20	0	NA	1	6	13	pre-test	velar	29	KG2	8	KG2_8.wav	0	272.253149
150	2	F	20	0	NA	1	6	13	pre-test	velar	30	KG2	3	KG2_3.wav	0	203.550174
150	2	F	20	0	NA	1	6	13	pre-test	velar	31	KG2	11	KG2_11.wav	1	133.901174
150	2	F	20	0	NA	1	6	13	pre-test	velar	32	KG2	2	KG2_2.wav	0	101.06569
150	2	F	20	0	NA	1	6	13	pre-test	velar	33	KG2	6	KG2_6.wav	0	103.845473
150	2	F	20	0	NA	1	6	13	pre-test	velar	34	KG2	4	KG2_4.wav	0	84.367734
150	2	F	20	0	NA	1	6	13	pre-test	velar	35	KG2	12	KG2_12.wav	1	88.602456
150	2	F	20	0	NA	1	6	13	pre-test	velar	36	KG2	7	KG2_7.wav	0	179.617596
150	2	F	20	0	NA	1	6	13	pre-test	bilabial	37	PB2	4	PB2_4.wav	0	327.261969
150	2	F	20	0	NA	1	6	13	pre-test	bilabial	38	PB2	10	PB2_10.wav	1	121.963105
150	2	F	20	0	NA	1	6	13	pre-test	bilabial	39	PB2	11	PB2_11.wav	1	117.941442
150	2	F	20	0	NA	1	6	13	pre-test	bilabial	40	PB2	1	PB2_1.wav	0	198.5102
150	2	F	20	0	NA	1	6	13	pre-test	bilabial	41	PB2	5	PB2_5.wav	0	618.433264
150	2	F	20	0	NA	1	6	13	pre-test	bilabial	42	PB2	8	PB2_8.wav	1	231.528301
150	2	F	20	0	NA	1	6	13	pre-test	bilabial	43	PB2	12	PB2_12.wav	1	80.052755
150	2	F	20	0	NA	1	6	13	pre-test	bilabial	44	PB2	9	PB2_9.wav	1	123.678957
150	2	F	20	0	NA	1	6	13	pre-test	bilabial	45	PB2	2	PB2_2.wav	0	170.948941
150	2	F	20	0	NA	1	6	13	pre-test	bilabial	46	PB2	7	PB2_7.wav	1	63.786249
150	2	F	20	0	NA	1	6	13	pre-test	bilabial	47	PB2	6	PB2_6.wav	0	112.700135
150	2	F	20	0	NA	1	6	13	pre-test	bilabial	48	PB2	3	PB2_3.wav	0	90.956732
150	2	F	20	0	NA	1	6	13	pre-test	velar	49	KG3	3	KG3_3.wav	0	371.089979
150	2	F	20	0	NA	1	6	13	pre-test	velar	50	KG3	10	KG3_10.wav	1	200.104708
150	2	F	20	0	NA	1	6	13	pre-test	velar	51	KG3	12	KG3_12.wav	1	449.511115
150	2	F	20	0	NA	1	6	13	pre-test	velar	52	KG3	8	KG3_8.wav	0	146.973439
150	2	F	20	0	NA	1	6	13	pre-test	velar	53	KG3	9	KG3_9.wav	1	985.778599
150	2	F	20	0	NA	1	6	13	pre-test	velar	54	KG3	6	KG3_6.wav	0	214.965769
150	2	F	20	0	NA	1	6	13	pre-test	velar	55	KG3	1	KG3_1.wav	0	216.523593
150	2	F	20	0	NA	1	6	13	pre-test	velar	56	KG3	11	KG3_11.wav	1	76.620728
150	2	F	20	0	NA	1	6	13	pre-test	velar	57	KG3	5	KG3_5.wav	0	54.808921
150	2	F	20	0	NA	1	6	13	pre-test	velar	58	KG3	4	KG3_4.wav	0	84.222899
150	2	F	20	0	NA	1	6	13	pre-test	velar	59	KG3	2	KG3_2.wav	0	322.64982
150	2	F	20	0	NA	1	6	13	pre-test	velar	60	KG3	7	KG3_7.wav	0	505.745901
150	2	F	20	0	NA	1	6	13	pre-test	bilabial	61	PB3	11	PB3_11.wav	1	241.374225
150	2	F	20	0	NA	1	6	13	pre-test	bilabial	62	PB3	9	PB3_9.wav	1	192.448947
150	2	F	20	0	NA	1	6	13	pre-test	bilabial	63	PB3	1	PB3_1.wav	0	113.184384
150	2	F	20	0	NA	1	6	13	pre-test	bilabial	64	PB3	10	PB3_10.wav	1	148.100295
150	2	F	20	0	NA	1	6	13	pre-test	bilabial	65	PB3	7	PB3_7.wav	1	471.563632
150	2	F	20	0	NA	1	6	13	pre-test	bilabial	66	PB3	3	PB3_3.wav	0	203.337242
150	2	F	20	0	NA	1	6	13	pre-test	bilabial	67	PB3	6	PB3_6.wav	0	867.076187
150	2	F	20	0	NA	1	6	13	pre-test	bilabial	68	PB3	4	PB3_4.wav	0	408.996467
150	2	F	20	0	NA	1	6	13	pre-test	bilabial	69	PB3	12	PB3_12.wav	1	223.607233
150	2	F	20	0	NA	1	6	13	pre-test	bilabial	70	PB3	2	PB3_2.wav	0	197.658609
150	2	F	20	0	NA	1	6	13	pre-test	bilabial	71	PB3	5	PB3_5.wav	0	448.534993
150	2	F	20	0	NA	1	6	13	pre-test	bilabial	72	PB3	8	PB3_8.wav	1	142.473638
150	2	F	20	0	NA	1	7	14	post-test	bilabial	1	PB4	6	PB4_6.wav	0	435.688847
150	2	F	20	0	NA	1	7	14	post-test	bilabial	2	PB4	2	PB4_2.wav	0	201.165957
150	2	F	20	0	NA	1	7	14	post-test	bilabial	3	PB4	4	PB4_4.wav	0	176.458291
150	2	F	20	0	NA	1	7	14	post-test	bilabial	4	PB4	1	PB4_1.wav	0	226.699208
150	2	F	20	0	NA	1	7	14	post-test	bilabial	5	PB4	11	PB4_11.wav	1	231.309694
150	2	F	20	0	NA	1	7	14	post-test	bilabial	6	PB4	10	PB4_10.wav	1	167.178172
150	2	F	20	0	NA	1	7	14	post-test	bilabial	7	PB4	7	PB4_7.wav	1	223.173894
150	2	F	20	0	NA	1	7	14	post-test	bilabial	8	PB4	9	PB4_9.wav	1	188.345514
150	2	F	20	0	NA	1	7	14	post-test	bilabial	9	PB4	12	PB4_12.wav	1	147.305603
150	2	F	20	0	NA	1	7	14	post-test	bilabial	10	PB4	3	PB4_3.wav	0	93.873142
150	2	F	20	0	NA	1	7	14	post-test	bilabial	11	PB4	5	PB4_5.wav	0	174.27795
150	2	F	20	0	NA	1	7	14	post-test	bilabial	12	PB4	8	PB4_8.wav	0	181.958354
150	2	F	20	0	NA	1	7	14	post-test	velar	13	KG4	12	KG4_12.wav	1	205.479155
150	2	F	20	0	NA	1	7	14	post-test	velar	14	KG4	4	KG4_4.wav	0	89.765198
150	2	F	20	0	NA	1	7	14	post-test	velar	15	KG4	10	KG4_10.wav	1	135.282815
150	2	F	20	0	NA	1	7	14	post-test	velar	16	KG4	2	KG4_2.wav	0	123.714896
150	2	F	20	0	NA	1	7	14	post-test	velar	17	KG4	9	KG4_9.wav	1	443.887701
150	2	F	20	0	NA	1	7	14	post-test	velar	18	KG4	3	KG4_3.wav	0	125.067694
150	2	F	20	0	NA	1	7	14	post-test	velar	19	KG4	7	KG4_7.wav	0	374.308458
150	2	F	20	0	NA	1	7	14	post-test	velar	20	KG4	11	KG4_11.wav	1	116.166495
150	2	F	20	0	NA	1	7	14	post-test	velar	21	KG4	5	KG4_5.wav	0	58.257509
150	2	F	20	0	NA	1	7	14	post-test	velar	22	KG4	8	KG4_8.wav	1	126.372317
150	2	F	20	0	NA	1	7	14	post-test	velar	23	KG4	1	KG4_1.wav	0	110.700156
150	2	F	20	0	NA	1	7	14	post-test	velar	24	KG4	6	KG4_6.wav	0	399.433439
150	2	F	20	0	NA	1	7	14	post-test	bilabial	25	PB5	3	PB5_3.wav	0	197.528867
150	2	F	20	0	NA	1	7	14	post-test	bilabial	26	PB5	1	PB5_1.wav	0	102.1378
150	2	F	20	0	NA	1	7	14	post-test	bilabial	27	PB5	7	PB5_7.wav	1	136.578934
150	2	F	20	0	NA	1	7	14	post-test	bilabial	28	PB5	2	PB5_2.wav	0	115.992058
150	2	F	20	0	NA	1	7	14	post-test	bilabial	29	PB5	5	PB5_5.wav	0	303.034672
150	2	F	20	0	NA	1	7	14	post-test	bilabial	30	PB5	8	PB5_8.wav	1	146.356886
150	2	F	20	0	NA	1	7	14	post-test	bilabial	31	PB5	6	PB5_6.wav	0	134.305668
150	2	F	20	0	NA	1	7	14	post-test	bilabial	32	PB5	4	PB5_4.wav	0	17.24563
150	2	F	20	0	NA	1	7	14	post-test	bilabial	33	PB5	11	PB5_11.wav	1	154.87041
150	2	F	20	0	NA	1	7	14	post-test	bilabial	34	PB5	12	PB5_12.wav	1	41.095769
150	2	F	20	0	NA	1	7	14	post-test	bilabial	35	PB5	10	PB5_10.wav	1	54.89482
150	2	F	20	0	NA	1	7	14	post-test	bilabial	36	PB5	9	PB5_9.wav	1	35.766175
150	2	F	20	0	NA	1	7	14	post-test	velar	37	KG5	11	KG5_11.wav	1	331.006839
150	2	F	20	0	NA	1	7	14	post-test	velar	38	KG5	9	KG5_9.wav	1	38.94961
150	2	F	20	0	NA	1	7	14	post-test	velar	39	KG5	5	KG5_5.wav	0	31.580883
150	2	F	20	0	NA	1	7	14	post-test	velar	40	KG5	8	KG5_8.wav	1	383.500453
150	2	F	20	0	NA	1	7	14	post-test	velar	41	KG5	3	KG5_3.wav	0	18.949468
150	2	F	20	0	NA	1	7	14	post-test	velar	42	KG5	12	KG5_12.wav	1	9.934191999
150	2	F	20	0	NA	1	7	14	post-test	velar	43	KG5	2	KG5_2.wav	0	306.795422
150	2	F	20	0	NA	1	7	14	post-test	velar	44	KG5	7	KG5_7.wav	0	49.218621
150	2	F	20	0	NA	1	7	14	post-test	velar	45	KG5	6	KG5_6.wav	0	206.873565
150	2	F	20	0	NA	1	7	14	post-test	velar	46	KG5	4	KG5_4.wav	0	32.376169
150	2	F	20	0	NA	1	7	14	post-test	velar	47	KG5	1	KG5_1.wav	0	81.008785
150	2	F	20	0	NA	1	7	14	post-test	velar	48	KG5	10	KG5_10.wav	1	216.016463
150	2	F	20	0	NA	1	7	14	post-test	bilabial	49	PB6	7	PB6_7.wav	1	195.115848
150	2	F	20	0	NA	1	7	14	post-test	bilabial	50	PB6	11	PB6_11.wav	1	162.573904
150	2	F	20	0	NA	1	7	14	post-test	bilabial	51	PB6	10	PB6_10.wav	1	131.401491
150	2	F	20	0	NA	1	7	14	post-test	bilabial	52	PB6	3	PB6_3.wav	0	91.480554
150	2	F	20	0	NA	1	7	14	post-test	bilabial	53	PB6	12	PB6_12.wav	1	287.43083
150	2	F	20	0	NA	1	7	14	post-test	bilabial	54	PB6	8	PB6_8.wav	1	113.961581
150	2	F	20	0	NA	1	7	14	post-test	bilabial	55	PB6	5	PB6_5.wav	0	3.083397001
150	2	F	20	0	NA	1	7	14	post-test	bilabial	56	PB6	1	PB6_1.wav	0	107.41219
150	2	F	20	0	NA	1	7	14	post-test	bilabial	57	PB6	2	PB6_2.wav	0	102.096781
150	2	F	20	0	NA	1	7	14	post-test	bilabial	58	PB6	9	PB6_9.wav	1	119.002463
150	2	F	20	0	NA	1	7	14	post-test	bilabial	59	PB6	6	PB6_6.wav	0	123.024456
150	2	F	20	0	NA	1	7	14	post-test	bilabial	60	PB6	4	PB6_4.wav	0	133.108692
150	2	F	20	0	NA	1	7	14	post-test	velar	61	KG6	8	KG6_8.wav	0	378.292368
150	2	F	20	0	NA	1	7	14	post-test	velar	62	KG6	6	KG6_6.wav	0	130.900716
150	2	F	20	0	NA	1	7	14	post-test	velar	63	KG6	11	KG6_11.wav	1	63.522693
150	2	F	20	0	NA	1	7	14	post-test	velar	64	KG6	12	KG6_12.wav	1	326.122592
150	2	F	20	0	NA	1	7	14	post-test	velar	65	KG6	10	KG6_10.wav	1	91.655896
150	2	F	20	0	NA	1	7	14	post-test	velar	66	KG6	9	KG6_9.wav	0	25.410684
150	2	F	20	0	NA	1	7	14	post-test	velar	67	KG6	1	KG6_1.wav	0	140.042894
150	2	F	20	0	NA	1	7	14	post-test	velar	68	KG6	3	KG6_3.wav	0	82.267456
150	2	F	20	0	NA	1	7	14	post-test	velar	69	KG6	2	KG6_2.wav	0	115.919676
150	2	F	20	0	NA	1	7	14	post-test	velar	70	KG6	7	KG6_7.wav	0	103.100921
150	2	F	20	0	NA	1	7	14	post-test	velar	71	KG6	4	KG6_4.wav	0	71.092997
150	2	F	20	0	NA	1	7	14	post-test	velar	72	KG6	5	KG6_5.wav	0	37.542569
150	2	F	20	0	NA	1	7	15	pre-test	velar	1	KG1	6	KG1_6.wav	0	315.983308
150	2	F	20	0	NA	1	7	15	pre-test	velar	2	KG1	7	KG1_7.wav	0	479.04314
150	2	F	20	0	NA	1	7	15	pre-test	velar	3	KG1	1	KG1_1.wav	0	283.579966
150	2	F	20	0	NA	1	7	15	pre-test	velar	4	KG1	11	KG1_11.wav	1	152.276972
150	2	F	20	0	NA	1	7	15	pre-test	velar	5	KG1	9	KG1_9.wav	1	127.211929
150	2	F	20	0	NA	1	7	15	pre-test	velar	6	KG1	4	KG1_4.wav	0	105.622317
150	2	F	20	0	NA	1	7	15	pre-test	velar	7	KG1	12	KG1_12.wav	1	201.033081
150	2	F	20	0	NA	1	7	15	pre-test	velar	8	KG1	3	KG1_3.wav	0	237.836947
150	2	F	20	0	NA	1	7	15	pre-test	velar	9	KG1	2	KG1_2.wav	0	137.381512
150	2	F	20	0	NA	1	7	15	pre-test	velar	10	KG1	8	KG1_8.wav	0	338.294065
150	2	F	20	0	NA	1	7	15	pre-test	velar	11	KG1	10	KG1_10.wav	1	109.430919
150	2	F	20	0	NA	1	7	15	pre-test	velar	12	KG1	5	KG1_5.wav	0	165.754068
150	2	F	20	0	NA	1	7	15	pre-test	bilabial	13	PB1	7	PB1_7.wav	1	581.425647
150	2	F	20	0	NA	1	7	15	pre-test	bilabial	14	PB1	6	PB1_6.wav	1	116.429109
150	2	F	20	0	NA	1	7	15	pre-test	bilabial	15	PB1	3	PB1_3.wav	0	27.944177
150	2	F	20	0	NA	1	7	15	pre-test	bilabial	16	PB1	1	PB1_1.wav	0	57.579227
150	2	F	20	0	NA	1	7	15	pre-test	bilabial	17	PB1	10	PB1_10.wav	1	85.626649
150	2	F	20	0	NA	1	7	15	pre-test	bilabial	18	PB1	11	PB1_11.wav	1	150.623117
150	2	F	20	0	NA	1	7	15	pre-test	bilabial	19	PB1	4	PB1_4.wav	0	117.46474
150	2	F	20	0	NA	1	7	15	pre-test	bilabial	20	PB1	5	PB1_5.wav	0	176.218123
150	2	F	20	0	NA	1	7	15	pre-test	bilabial	21	PB1	9	PB1_9.wav	1	53.049229
150	2	F	20	0	NA	1	7	15	pre-test	bilabial	22	PB1	8	PB1_8.wav	1	95.611713
150	2	F	20	0	NA	1	7	15	pre-test	bilabial	23	PB1	12	PB1_12.wav	1	98.258189
150	2	F	20	0	NA	1	7	15	pre-test	bilabial	24	PB1	2	PB1_2.wav	0	190.230367
150	2	F	20	0	NA	1	7	15	pre-test	velar	25	KG2	2	KG2_2.wav	0	727.459591
150	2	F	20	0	NA	1	7	15	pre-test	velar	26	KG2	8	KG2_8.wav	1	136.543397
150	2	F	20	0	NA	1	7	15	pre-test	velar	27	KG2	12	KG2_12.wav	1	128.855038
150	2	F	20	0	NA	1	7	15	pre-test	velar	28	KG2	11	KG2_11.wav	1	62.149613
150	2	F	20	0	NA	1	7	15	pre-test	velar	29	KG2	6	KG2_6.wav	0	98.860534
150	2	F	20	0	NA	1	7	15	pre-test	velar	30	KG2	1	KG2_1.wav	0	68.922142
150	2	F	20	0	NA	1	7	15	pre-test	velar	31	KG2	9	KG2_9.wav	1	1156.851997
150	2	F	20	0	NA	1	7	15	pre-test	velar	32	KG2	4	KG2_4.wav	0	84.976741
150	2	F	20	0	NA	1	7	15	pre-test	velar	33	KG2	3	KG2_3.wav	0	77.90344
150	2	F	20	0	NA	1	7	15	pre-test	velar	34	KG2	5	KG2_5.wav	0	94.059626
150	2	F	20	0	NA	1	7	15	pre-test	velar	35	KG2	10	KG2_10.wav	1	96.818004
150	2	F	20	0	NA	1	7	15	pre-test	velar	36	KG2	7	KG2_7.wav	1	73.83301
150	2	F	20	0	NA	1	7	15	pre-test	bilabial	37	PB2	5	PB2_5.wav	0	263.510409
150	2	F	20	0	NA	1	7	15	pre-test	bilabial	38	PB2	3	PB2_3.wav	0	131.778024
150	2	F	20	0	NA	1	7	15	pre-test	bilabial	39	PB2	12	PB2_12.wav	1	106.222715
150	2	F	20	0	NA	1	7	15	pre-test	bilabial	40	PB2	1	PB2_1.wav	0	179.227124
150	2	F	20	0	NA	1	7	15	pre-test	bilabial	41	PB2	10	PB2_10.wav	1	128.948736
150	2	F	20	0	NA	1	7	15	pre-test	bilabial	42	PB2	8	PB2_8.wav	1	240.74654
150	2	F	20	0	NA	1	7	15	pre-test	bilabial	43	PB2	11	PB2_11.wav	1	162.067684
150	2	F	20	0	NA	1	7	15	pre-test	bilabial	44	PB2	6	PB2_6.wav	0	17.062039
150	2	F	20	0	NA	1	7	15	pre-test	bilabial	45	PB2	7	PB2_7.wav	1	347.361714
150	2	F	20	0	NA	1	7	15	pre-test	bilabial	46	PB2	2	PB2_2.wav	0	82.136292
150	2	F	20	0	NA	1	7	15	pre-test	bilabial	47	PB2	9	PB2_9.wav	1	267.712492
150	2	F	20	0	NA	1	7	15	pre-test	bilabial	48	PB2	4	PB2_4.wav	0	119.473337
150	2	F	20	0	NA	1	7	15	pre-test	velar	49	KG3	9	KG3_9.wav	1	394.971109
150	2	F	20	0	NA	1	7	15	pre-test	velar	50	KG3	6	KG3_6.wav	0	78.848318
150	2	F	20	0	NA	1	7	15	pre-test	velar	51	KG3	10	KG3_10.wav	1	201.838792
150	2	F	20	0	NA	1	7	15	pre-test	velar	52	KG3	12	KG3_12.wav	1	162.670796
150	2	F	20	0	NA	1	7	15	pre-test	velar	53	KG3	2	KG3_2.wav	0	123.22332
150	2	F	20	0	NA	1	7	15	pre-test	velar	54	KG3	3	KG3_3.wav	0	82.679316
150	2	F	20	0	NA	1	7	15	pre-test	velar	55	KG3	4	KG3_4.wav	0	81.948832
150	2	F	20	0	NA	1	7	15	pre-test	velar	56	KG3	5	KG3_5.wav	0	52.588702
150	2	F	20	0	NA	1	7	15	pre-test	velar	57	KG3	8	KG3_8.wav	1	62.730291
150	2	F	20	0	NA	1	7	15	pre-test	velar	58	KG3	1	KG3_1.wav	0	80.313942
150	2	F	20	0	NA	1	7	15	pre-test	velar	59	KG3	11	KG3_11.wav	1	65.79202
150	2	F	20	0	NA	1	7	15	pre-test	velar	60	KG3	7	KG3_7.wav	0	99.119424
150	2	F	20	0	NA	1	7	15	pre-test	bilabial	61	PB3	4	PB3_4.wav	0	277.852471
150	2	F	20	0	NA	1	7	15	pre-test	bilabial	62	PB3	9	PB3_9.wav	1	74.792625
150	2	F	20	0	NA	1	7	15	pre-test	bilabial	63	PB3	1	PB3_1.wav	0	111.664174
150	2	F	20	0	NA	1	7	15	pre-test	bilabial	64	PB3	12	PB3_12.wav	1	91.85317
150	2	F	20	0	NA	1	7	15	pre-test	bilabial	65	PB3	3	PB3_3.wav	0	43.672427
150	2	F	20	0	NA	1	7	15	pre-test	bilabial	66	PB3	7	PB3_7.wav	0	671.247567
150	2	F	20	0	NA	1	7	15	pre-test	bilabial	67	PB3	6	PB3_6.wav	0	203.869269
150	2	F	20	0	NA	1	7	15	pre-test	bilabial	68	PB3	8	PB3_8.wav	0	218.200787
150	2	F	20	0	NA	1	7	15	pre-test	bilabial	69	PB3	5	PB3_5.wav	0	145.717436
150	2	F	20	0	NA	1	7	15	pre-test	bilabial	70	PB3	10	PB3_10.wav	1	100.284466
150	2	F	20	0	NA	1	7	15	pre-test	bilabial	71	PB3	2	PB3_2.wav	0	135.375188
150	2	F	20	0	NA	1	7	15	pre-test	bilabial	72	PB3	11	PB3_11.wav	1	50.480554
150	2	F	20	0	NA	1	8	16	post-test	bilabial	1	PB4	5	PB4_5.wav	0	641.335747
150	2	F	20	0	NA	1	8	16	post-test	bilabial	2	PB4	11	PB4_11.wav	1	518.20881
150	2	F	20	0	NA	1	8	16	post-test	bilabial	3	PB4	12	PB4_12.wav	1	240.725604
150	2	F	20	0	NA	1	8	16	post-test	bilabial	4	PB4	7	PB4_7.wav	0	146.391062
150	2	F	20	0	NA	1	8	16	post-test	bilabial	5	PB4	3	PB4_3.wav	0	339.472116
150	2	F	20	0	NA	1	8	16	post-test	bilabial	6	PB4	9	PB4_9.wav	1	321.559673
150	2	F	20	0	NA	1	8	16	post-test	bilabial	7	PB4	2	PB4_2.wav	0	157.694247
150	2	F	20	0	NA	1	8	16	post-test	bilabial	8	PB4	10	PB4_10.wav	1	133.45614
150	2	F	20	0	NA	1	8	16	post-test	bilabial	9	PB4	4	PB4_4.wav	0	139.634796
150	2	F	20	0	NA	1	8	16	post-test	bilabial	10	PB4	1	PB4_1.wav	0	159.657206
150	2	F	20	0	NA	1	8	16	post-test	bilabial	11	PB4	6	PB4_6.wav	0	293.162072
150	2	F	20	0	NA	1	8	16	post-test	bilabial	12	PB4	8	PB4_8.wav	1	177.214849
150	2	F	20	0	NA	1	8	16	post-test	velar	13	KG4	12	KG4_12.wav	1	277.337818
150	2	F	20	0	NA	1	8	16	post-test	velar	14	KG4	9	KG4_9.wav	1	102.53651
150	2	F	20	0	NA	1	8	16	post-test	velar	15	KG4	3	KG4_3.wav	0	37.030548
150	2	F	20	0	NA	1	8	16	post-test	velar	16	KG4	10	KG4_10.wav	1	52.829449
150	2	F	20	0	NA	1	8	16	post-test	velar	17	KG4	4	KG4_4.wav	0	93.22558
150	2	F	20	0	NA	1	8	16	post-test	velar	18	KG4	11	KG4_11.wav	1	388.298015
150	2	F	20	0	NA	1	8	16	post-test	velar	19	KG4	1	KG4_1.wav	0	211.500875
150	2	F	20	0	NA	1	8	16	post-test	velar	20	KG4	7	KG4_7.wav	0	156.060586
150	2	F	20	0	NA	1	8	16	post-test	velar	21	KG4	5	KG4_5.wav	0	110.60831
150	2	F	20	0	NA	1	8	16	post-test	velar	22	KG4	2	KG4_2.wav	0	79.28857
150	2	F	20	0	NA	1	8	16	post-test	velar	23	KG4	8	KG4_8.wav	0	186.388146
150	2	F	20	0	NA	1	8	16	post-test	velar	24	KG4	6	KG4_6.wav	0	87.759093
150	2	F	20	0	NA	1	8	16	post-test	bilabial	25	PB5	4	PB5_4.wav	0	434.708166
150	2	F	20	0	NA	1	8	16	post-test	bilabial	26	PB5	9	PB5_9.wav	1	216.063922
150	2	F	20	0	NA	1	8	16	post-test	bilabial	27	PB5	8	PB5_8.wav	1	630.422722
150	2	F	20	0	NA	1	8	16	post-test	bilabial	28	PB5	10	PB5_10.wav	1	204.716654
150	2	F	20	0	NA	1	8	16	post-test	bilabial	29	PB5	7	PB5_7.wav	0	229.460347
150	2	F	20	0	NA	1	8	16	post-test	bilabial	30	PB5	3	PB5_3.wav	0	124.3077
150	2	F	20	0	NA	1	8	16	post-test	bilabial	31	PB5	12	PB5_12.wav	1	199.608561
150	2	F	20	0	NA	1	8	16	post-test	bilabial	32	PB5	11	PB5_11.wav	1	301.123426
150	2	F	20	0	NA	1	8	16	post-test	bilabial	33	PB5	2	PB5_2.wav	0	132.765639
150	2	F	20	0	NA	1	8	16	post-test	bilabial	34	PB5	6	PB5_6.wav	0	228.370045
150	2	F	20	0	NA	1	8	16	post-test	bilabial	35	PB5	5	PB5_5.wav	0	162.730767
150	2	F	20	0	NA	1	8	16	post-test	bilabial	36	PB5	1	PB5_1.wav	0	78.17139
150	2	F	20	0	NA	1	8	16	post-test	velar	37	KG5	10	KG5_10.wav	1	441.664284
150	2	F	20	0	NA	1	8	16	post-test	velar	38	KG5	11	KG5_11.wav	1	121.544825
150	2	F	20	0	NA	1	8	16	post-test	velar	39	KG5	6	KG5_6.wav	0	371.983821
150	2	F	20	0	NA	1	8	16	post-test	velar	40	KG5	4	KG5_4.wav	0	112.684493
150	2	F	20	0	NA	1	8	16	post-test	velar	41	KG5	12	KG5_12.wav	1	148.578068
150	2	F	20	0	NA	1	8	16	post-test	velar	42	KG5	1	KG5_1.wav	0	41.15694
150	2	F	20	0	NA	1	8	16	post-test	velar	43	KG5	7	KG5_7.wav	0	64.345186
150	2	F	20	0	NA	1	8	16	post-test	velar	44	KG5	5	KG5_5.wav	0	32.753083
150	2	F	20	0	NA	1	8	16	post-test	velar	45	KG5	8	KG5_8.wav	1	214.948018
150	2	F	20	0	NA	1	8	16	post-test	velar	46	KG5	9	KG5_9.wav	1	193.126284
150	2	F	20	0	NA	1	8	16	post-test	velar	47	KG5	3	KG5_3.wav	0	76.236412
150	2	F	20	0	NA	1	8	16	post-test	velar	48	KG5	2	KG5_2.wav	0	58.220161
150	2	F	20	0	NA	1	8	16	post-test	bilabial	49	PB6	1	PB6_1.wav	0	157.363118
150	2	F	20	0	NA	1	8	16	post-test	bilabial	50	PB6	4	PB6_4.wav	0	223.004208
150	2	F	20	0	NA	1	8	16	post-test	bilabial	51	PB6	10	PB6_10.wav	1	178.241058
150	2	F	20	0	NA	1	8	16	post-test	bilabial	52	PB6	7	PB6_7.wav	1	404.51769
150	2	F	20	0	NA	1	8	16	post-test	bilabial	53	PB6	8	PB6_8.wav	1	266.874813
150	2	F	20	0	NA	1	8	16	post-test	bilabial	54	PB6	11	PB6_11.wav	1	257.480922
150	2	F	20	0	NA	1	8	16	post-test	bilabial	55	PB6	3	PB6_3.wav	0	224.040506
150	2	F	20	0	NA	1	8	16	post-test	bilabial	56	PB6	12	PB6_12.wav	1	190.499136
150	2	F	20	0	NA	1	8	16	post-test	bilabial	57	PB6	2	PB6_2.wav	0	197.183504
150	2	F	20	0	NA	1	8	16	post-test	bilabial	58	PB6	5	PB6_5.wav	0	421.355743
150	2	F	20	0	NA	1	8	16	post-test	bilabial	59	PB6	9	PB6_9.wav	1	227.89298
150	2	F	20	0	NA	1	8	16	post-test	bilabial	60	PB6	6	PB6_6.wav	0	247.108975
150	2	F	20	0	NA	1	8	16	post-test	velar	61	KG6	12	KG6_12.wav	1	862.723732
150	2	F	20	0	NA	1	8	16	post-test	velar	62	KG6	11	KG6_11.wav	1	259.727855
150	2	F	20	0	NA	1	8	16	post-test	velar	63	KG6	2	KG6_2.wav	0	173.687256
150	2	F	20	0	NA	1	8	16	post-test	velar	64	KG6	1	KG6_1.wav	0	156.289632
150	2	F	20	0	NA	1	8	16	post-test	velar	65	KG6	7	KG6_7.wav	0	90.918407
150	2	F	20	0	NA	1	8	16	post-test	velar	66	KG6	3	KG6_3.wav	0	143.977677
150	2	F	20	0	NA	1	8	16	post-test	velar	67	KG6	9	KG6_9.wav	0	316.831141
150	2	F	20	0	NA	1	8	16	post-test	velar	68	KG6	10	KG6_10.wav	1	234.075193
150	2	F	20	0	NA	1	8	16	post-test	velar	69	KG6	8	KG6_8.wav	1	170.533417
150	2	F	20	0	NA	1	8	16	post-test	velar	70	KG6	6	KG6_6.wav	0	156.441565
150	2	F	20	0	NA	1	8	16	post-test	velar	71	KG6	5	KG6_5.wav	0	160.396949
150	2	F	20	0	NA	1	8	16	post-test	velar	72	KG6	4	KG6_4.wav	0	333.82589
150	2	F	20	0	NA	1	8	17	pre-test	velar	1	KG1	6	KG1_6.wav	0	272.816901
150	2	F	20	0	NA	1	8	17	pre-test	velar	2	KG1	12	KG1_12.wav	1	238.181
150	2	F	20	0	NA	1	8	17	pre-test	velar	3	KG1	10	KG1_10.wav	1	143.386039
150	2	F	20	0	NA	1	8	17	pre-test	velar	4	KG1	1	KG1_1.wav	0	140.047945
150	2	F	20	0	NA	1	8	17	pre-test	velar	5	KG1	5	KG1_5.wav	0	117.544293
150	2	F	20	0	NA	1	8	17	pre-test	velar	6	KG1	9	KG1_9.wav	1	96.973468
150	2	F	20	0	NA	1	8	17	pre-test	velar	7	KG1	7	KG1_7.wav	0	316.980955
150	2	F	20	0	NA	1	8	17	pre-test	velar	8	KG1	3	KG1_3.wav	0	166.052907
150	2	F	20	0	NA	1	8	17	pre-test	velar	9	KG1	2	KG1_2.wav	0	135.696261
150	2	F	20	0	NA	1	8	17	pre-test	velar	10	KG1	11	KG1_11.wav	1	162.044026
150	2	F	20	0	NA	1	8	17	pre-test	velar	11	KG1	8	KG1_8.wav	1	72.472029
150	2	F	20	0	NA	1	8	17	pre-test	velar	12	KG1	4	KG1_4.wav	0	117.927311
150	2	F	20	0	NA	1	8	17	pre-test	bilabial	13	PB1	11	PB1_11.wav	0	235.947694
150	2	F	20	0	NA	1	8	17	pre-test	bilabial	14	PB1	2	PB1_2.wav	0	73.707589
150	2	F	20	0	NA	1	8	17	pre-test	bilabial	15	PB1	8	PB1_8.wav	1	323.452049
150	2	F	20	0	NA	1	8	17	pre-test	bilabial	16	PB1	5	PB1_5.wav	0	660.052144
150	2	F	20	0	NA	1	8	17	pre-test	bilabial	17	PB1	3	PB1_3.wav	0	158.692736
150	2	F	20	0	NA	1	8	17	pre-test	bilabial	18	PB1	10	PB1_10.wav	1	95.285627
150	2	F	20	0	NA	1	8	17	pre-test	bilabial	19	PB1	4	PB1_4.wav	0	96.921692
150	2	F	20	0	NA	1	8	17	pre-test	bilabial	20	PB1	1	PB1_1.wav	0	123.694384
150	2	F	20	0	NA	1	8	17	pre-test	bilabial	21	PB1	9	PB1_9.wav	1	163.614351
150	2	F	20	0	NA	1	8	17	pre-test	bilabial	22	PB1	7	PB1_7.wav	1	146.666698
150	2	F	20	0	NA	1	8	17	pre-test	bilabial	23	PB1	12	PB1_12.wav	1	208.995311
150	2	F	20	0	NA	1	8	17	pre-test	bilabial	24	PB1	6	PB1_6.wav	0	246.000814
150	2	F	20	0	NA	1	8	17	pre-test	velar	25	KG2	6	KG2_6.wav	0	432.826271
150	2	F	20	0	NA	1	8	17	pre-test	velar	26	KG2	10	KG2_10.wav	1	130.191696
150	2	F	20	0	NA	1	8	17	pre-test	velar	27	KG2	5	KG2_5.wav	0	170.360565
150	2	F	20	0	NA	1	8	17	pre-test	velar	28	KG2	9	KG2_9.wav	1	96.904292
150	2	F	20	0	NA	1	8	17	pre-test	velar	29	KG2	11	KG2_11.wav	1	71.790566
150	2	F	20	0	NA	1	8	17	pre-test	velar	30	KG2	1	KG2_1.wav	0	83.838019
150	2	F	20	0	NA	1	8	17	pre-test	velar	31	KG2	7	KG2_7.wav	0	252.9118
150	2	F	20	0	NA	1	8	17	pre-test	velar	32	KG2	12	KG2_12.wav	1	118.562576
150	2	F	20	0	NA	1	8	17	pre-test	velar	33	KG2	3	KG2_3.wav	0	190.801868
150	2	F	20	0	NA	1	8	17	pre-test	velar	34	KG2	4	KG2_4.wav	0	59.852826
150	2	F	20	0	NA	1	8	17	pre-test	velar	35	KG2	8	KG2_8.wav	0	389.272024
150	2	F	20	0	NA	1	8	17	pre-test	velar	36	KG2	2	KG2_2.wav	0	127.542312
150	2	F	20	0	NA	1	8	17	pre-test	bilabial	37	PB2	4	PB2_4.wav	0	374.207653
150	2	F	20	0	NA	1	8	17	pre-test	bilabial	38	PB2	1	PB2_1.wav	0	167.46403
150	2	F	20	0	NA	1	8	17	pre-test	bilabial	39	PB2	8	PB2_8.wav	1	158.76848
150	2	F	20	0	NA	1	8	17	pre-test	bilabial	40	PB2	7	PB2_7.wav	1	195.930346
150	2	F	20	0	NA	1	8	17	pre-test	bilabial	41	PB2	9	PB2_9.wav	1	135.242341
150	2	F	20	0	NA	1	8	17	pre-test	bilabial	42	PB2	6	PB2_6.wav	0	231.541235
150	2	F	20	0	NA	1	8	17	pre-test	bilabial	43	PB2	12	PB2_12.wav	1	384.772469
150	2	F	20	0	NA	1	8	17	pre-test	bilabial	44	PB2	2	PB2_2.wav	0	206.620051
150	2	F	20	0	NA	1	8	17	pre-test	bilabial	45	PB2	5	PB2_5.wav	0	135.063426
150	2	F	20	0	NA	1	8	17	pre-test	bilabial	46	PB2	11	PB2_11.wav	1	159.367923
150	2	F	20	0	NA	1	8	17	pre-test	bilabial	47	PB2	10	PB2_10.wav	1	127.97896
150	2	F	20	0	NA	1	8	17	pre-test	bilabial	48	PB2	3	PB2_3.wav	0	152.368658
150	2	F	20	0	NA	1	8	17	pre-test	velar	49	KG3	12	KG3_12.wav	1	243.858269
150	2	F	20	0	NA	1	8	17	pre-test	velar	50	KG3	10	KG3_10.wav	1	133.900256
150	2	F	20	0	NA	1	8	17	pre-test	velar	51	KG3	5	KG3_5.wav	0	167.361835
150	2	F	20	0	NA	1	8	17	pre-test	velar	52	KG3	9	KG3_9.wav	1	123.032288
150	2	F	20	0	NA	1	8	17	pre-test	velar	53	KG3	2	KG3_2.wav	0	143.023329
150	2	F	20	0	NA	1	8	17	pre-test	velar	54	KG3	6	KG3_6.wav	0	137.345117
150	2	F	20	0	NA	1	8	17	pre-test	velar	55	KG3	8	KG3_8.wav	1	104.350748
150	2	F	20	0	NA	1	8	17	pre-test	velar	56	KG3	3	KG3_3.wav	0	103.661832
150	2	F	20	0	NA	1	8	17	pre-test	velar	57	KG3	4	KG3_4.wav	0	209.00107
150	2	F	20	0	NA	1	8	17	pre-test	velar	58	KG3	1	KG3_1.wav	0	228.215649
150	2	F	20	0	NA	1	8	17	pre-test	velar	59	KG3	7	KG3_7.wav	0	245.842086
150	2	F	20	0	NA	1	8	17	pre-test	velar	60	KG3	11	KG3_11.wav	1	192.076709
150	2	F	20	0	NA	1	8	17	pre-test	bilabial	61	PB3	2	PB3_2.wav	0	559.856776
150	2	F	20	0	NA	1	8	17	pre-test	bilabial	62	PB3	11	PB3_11.wav	1	327.862593
150	2	F	20	0	NA	1	8	17	pre-test	bilabial	63	PB3	7	PB3_7.wav	0	234.57347
150	2	F	20	0	NA	1	8	17	pre-test	bilabial	64	PB3	10	PB3_10.wav	1	122.738817
150	2	F	20	0	NA	1	8	17	pre-test	bilabial	65	PB3	8	PB3_8.wav	1	170.531753
150	2	F	20	0	NA	1	8	17	pre-test	bilabial	66	PB3	12	PB3_12.wav	1	300.271723
150	2	F	20	0	NA	1	8	17	pre-test	bilabial	67	PB3	9	PB3_9.wav	1	416.036968
150	2	F	20	0	NA	1	8	17	pre-test	bilabial	68	PB3	3	PB3_3.wav	0	215.050369
150	2	F	20	0	NA	1	8	17	pre-test	bilabial	69	PB3	4	PB3_4.wav	0	229.410734
150	2	F	20	0	NA	1	8	17	pre-test	bilabial	70	PB3	5	PB3_5.wav	0	54.108901
150	2	F	20	0	NA	1	8	17	pre-test	bilabial	71	PB3	1	PB3_1.wav	0	174.58158
150	2	F	20	0	NA	1	8	17	pre-test	bilabial	72	PB3	6	PB3_6.wav	1	108.038456
150	2	F	20	0	NA	1	9	18	post-test	bilabial	1	PB4	10	PB4_10.wav	1	352.26475
150	2	F	20	0	NA	1	9	18	post-test	bilabial	2	PB4	2	PB4_2.wav	0	154.093248
150	2	F	20	0	NA	1	9	18	post-test	bilabial	3	PB4	1	PB4_1.wav	0	43.833843
150	2	F	20	0	NA	1	9	18	post-test	bilabial	4	PB4	8	PB4_8.wav	1	91.668883
150	2	F	20	0	NA	1	9	18	post-test	bilabial	5	PB4	7	PB4_7.wav	1	207.391249
150	2	F	20	0	NA	1	9	18	post-test	bilabial	6	PB4	12	PB4_12.wav	1	76.536287
150	2	F	20	0	NA	1	9	18	post-test	bilabial	7	PB4	3	PB4_3.wav	0	104.685437
150	2	F	20	0	NA	1	9	18	post-test	bilabial	8	PB4	6	PB4_6.wav	0	86.006425
150	2	F	20	0	NA	1	9	18	post-test	bilabial	9	PB4	9	PB4_9.wav	1	73.081938
150	2	F	20	0	NA	1	9	18	post-test	bilabial	10	PB4	4	PB4_4.wav	0	69.109036
150	2	F	20	0	NA	1	9	18	post-test	bilabial	11	PB4	5	PB4_5.wav	0	74.657818
150	2	F	20	0	NA	1	9	18	post-test	bilabial	12	PB4	11	PB4_11.wav	1	91.837997
150	2	F	20	0	NA	1	9	18	post-test	velar	13	KG4	12	KG4_12.wav	1	334.825371
150	2	F	20	0	NA	1	9	18	post-test	velar	14	KG4	10	KG4_10.wav	1	60.647802
150	2	F	20	0	NA	1	9	18	post-test	velar	15	KG4	3	KG4_3.wav	0	120.600189
150	2	F	20	0	NA	1	9	18	post-test	velar	16	KG4	7	KG4_7.wav	0	288.671026
150	2	F	20	0	NA	1	9	18	post-test	velar	17	KG4	9	KG4_9.wav	1	42.767979
150	2	F	20	0	NA	1	9	18	post-test	velar	18	KG4	11	KG4_11.wav	1	3.91678
150	2	F	20	0	NA	1	9	18	post-test	velar	19	KG4	5	KG4_5.wav	0	0.03826
150	2	F	20	0	NA	1	9	18	post-test	velar	20	KG4	2	KG4_2.wav	0	317.869761
150	2	F	20	0	NA	1	9	18	post-test	velar	21	KG4	6	KG4_6.wav	0	13.692317
150	2	F	20	0	NA	1	9	18	post-test	velar	22	KG4	8	KG4_8.wav	1	36.000593
150	2	F	20	0	NA	1	9	18	post-test	velar	23	KG4	1	KG4_1.wav	0	45.58782
150	2	F	20	0	NA	1	9	18	post-test	velar	24	KG4	4	KG4_4.wav	0	57.595306
150	2	F	20	0	NA	1	9	18	post-test	bilabial	25	PB5	12	PB5_12.wav	1	197.482518
150	2	F	20	0	NA	1	9	18	post-test	bilabial	26	PB5	6	PB5_6.wav	0	92.054062
150	2	F	20	0	NA	1	9	18	post-test	bilabial	27	PB5	8	PB5_8.wav	1	49.880119
150	2	F	20	0	NA	1	9	18	post-test	bilabial	28	PB5	11	PB5_11.wav	1	230.121363
150	2	F	20	0	NA	1	9	18	post-test	bilabial	29	PB5	3	PB5_3.wav	0	133.418849
150	2	F	20	0	NA	1	9	18	post-test	bilabial	30	PB5	2	PB5_2.wav	0	255.294011
150	2	F	20	0	NA	1	9	18	post-test	bilabial	31	PB5	1	PB5_1.wav	0	166.100084
150	2	F	20	0	NA	1	9	18	post-test	bilabial	32	PB5	10	PB5_10.wav	1	205.934765
150	2	F	20	0	NA	1	9	18	post-test	bilabial	33	PB5	5	PB5_5.wav	0	83.28896
150	2	F	20	0	NA	1	9	18	post-test	bilabial	34	PB5	4	PB5_4.wav	0	74.790754
150	2	F	20	0	NA	1	9	18	post-test	bilabial	35	PB5	7	PB5_7.wav	1	212.320937
150	2	F	20	0	NA	1	9	18	post-test	bilabial	36	PB5	9	PB5_9.wav	1	134.713014
150	2	F	20	0	NA	1	9	18	post-test	velar	37	KG5	9	KG5_9.wav	0	224.776289
150	2	F	20	0	NA	1	9	18	post-test	velar	38	KG5	10	KG5_10.wav	1	42.094625
150	2	F	20	0	NA	1	9	18	post-test	velar	39	KG5	7	KG5_7.wav	0	3.704336
150	2	F	20	0	NA	1	9	18	post-test	velar	40	KG5	11	KG5_11.wav	1	1899.122008
150	2	F	20	0	NA	1	9	18	post-test	velar	41	KG5	4	KG5_4.wav	0	96.881003
150	2	F	20	0	NA	1	9	18	post-test	velar	42	KG5	1	KG5_1.wav	0	47.239947
150	2	F	20	0	NA	1	9	18	post-test	velar	43	KG5	5	KG5_5.wav	0	123.589053
150	2	F	20	0	NA	1	9	18	post-test	velar	44	KG5	12	KG5_12.wav	1	83.444837
150	2	F	20	0	NA	1	9	18	post-test	velar	45	KG5	3	KG5_3.wav	0	250.68658
150	2	F	20	0	NA	1	9	18	post-test	velar	46	KG5	6	KG5_6.wav	1	281.665151
150	2	F	20	0	NA	1	9	18	post-test	velar	47	KG5	8	KG5_8.wav	1	64.020557
150	2	F	20	0	NA	1	9	18	post-test	velar	48	KG5	2	KG5_2.wav	0	54.949229
150	2	F	20	0	NA	1	9	18	post-test	bilabial	49	PB6	7	PB6_7.wav	1	280.367795
150	2	F	20	0	NA	1	9	18	post-test	bilabial	50	PB6	8	PB6_8.wav	1	195.575314
150	2	F	20	0	NA	1	9	18	post-test	bilabial	51	PB6	1	PB6_1.wav	0	128.141681
150	2	F	20	0	NA	1	9	18	post-test	bilabial	52	PB6	5	PB6_5.wav	0	60.74873
150	2	F	20	0	NA	1	9	18	post-test	bilabial	53	PB6	11	PB6_11.wav	0	90.18184
150	2	F	20	0	NA	1	9	18	post-test	bilabial	54	PB6	9	PB6_9.wav	1	149.383491
150	2	F	20	0	NA	1	9	18	post-test	bilabial	55	PB6	3	PB6_3.wav	0	97.445684
150	2	F	20	0	NA	1	9	18	post-test	bilabial	56	PB6	12	PB6_12.wav	1	72.771808
150	2	F	20	0	NA	1	9	18	post-test	bilabial	57	PB6	10	PB6_10.wav	1	156.216588
150	2	F	20	0	NA	1	9	18	post-test	bilabial	58	PB6	4	PB6_4.wav	0	141.389178
150	2	F	20	0	NA	1	9	18	post-test	bilabial	59	PB6	6	PB6_6.wav	0	85.888045
150	2	F	20	0	NA	1	9	18	post-test	bilabial	60	PB6	2	PB6_2.wav	0	113.82401
150	2	F	20	0	NA	1	9	18	post-test	velar	61	KG6	3	KG6_3.wav	0	303.235213
150	2	F	20	0	NA	1	9	18	post-test	velar	62	KG6	9	KG6_9.wav	1	65.64685
150	2	F	20	0	NA	1	9	18	post-test	velar	63	KG6	4	KG6_4.wav	0	127.012117
150	2	F	20	0	NA	1	9	18	post-test	velar	64	KG6	10	KG6_10.wav	1	618.487478
150	2	F	20	0	NA	1	9	18	post-test	velar	65	KG6	8	KG6_8.wav	0	149.357501
150	2	F	20	0	NA	1	9	18	post-test	velar	66	KG6	5	KG6_5.wav	0	159.802754
150	2	F	20	0	NA	1	9	18	post-test	velar	67	KG6	1	KG6_1.wav	0	91.754414
150	2	F	20	0	NA	1	9	18	post-test	velar	68	KG6	11	KG6_11.wav	1	66.647003
150	2	F	20	0	NA	1	9	18	post-test	velar	69	KG6	12	KG6_12.wav	1	25.637087
150	2	F	20	0	NA	1	9	18	post-test	velar	70	KG6	6	KG6_6.wav	0	33.273107
150	2	F	20	0	NA	1	9	18	post-test	velar	71	KG6	2	KG6_2.wav	0	28.308809
150	2	F	20	0	NA	1	9	18	post-test	velar	72	KG6	7	KG6_7.wav	0	53.808928
150	2	F	20	0	NA	1	9	19	pre-test	velar	1	KG1	5	KG1_5.wav	0	309.634641
150	2	F	20	0	NA	1	9	19	pre-test	velar	2	KG1	12	KG1_12.wav	1	357.121368
150	2	F	20	0	NA	1	9	19	pre-test	velar	3	KG1	3	KG1_3.wav	0	17.711644
150	2	F	20	0	NA	1	9	19	pre-test	velar	4	KG1	9	KG1_9.wav	1	264.296277
150	2	F	20	0	NA	1	9	19	pre-test	velar	5	KG1	7	KG1_7.wav	1	127.079079
150	2	F	20	0	NA	1	9	19	pre-test	velar	6	KG1	4	KG1_4.wav	0	113.684736
150	2	F	20	0	NA	1	9	19	pre-test	velar	7	KG1	1	KG1_1.wav	0	211.285917
150	2	F	20	0	NA	1	9	19	pre-test	velar	8	KG1	11	KG1_11.wav	1	115.313844
150	2	F	20	0	NA	1	9	19	pre-test	velar	9	KG1	6	KG1_6.wav	0	63.887326
150	2	F	20	0	NA	1	9	19	pre-test	velar	10	KG1	2	KG1_2.wav	0	19.839916
150	2	F	20	0	NA	1	9	19	pre-test	velar	11	KG1	8	KG1_8.wav	0	202.84587
150	2	F	20	0	NA	1	9	19	pre-test	velar	12	KG1	10	KG1_10.wav	1	106.787646
150	2	F	20	0	NA	1	9	19	pre-test	bilabial	13	PB1	5	PB1_5.wav	0	296.343058
150	2	F	20	0	NA	1	9	19	pre-test	bilabial	14	PB1	9	PB1_9.wav	1	187.351277
150	2	F	20	0	NA	1	9	19	pre-test	bilabial	15	PB1	3	PB1_3.wav	0	145.666674
150	2	F	20	0	NA	1	9	19	pre-test	bilabial	16	PB1	1	PB1_1.wav	0	88.971198
150	2	F	20	0	NA	1	9	19	pre-test	bilabial	17	PB1	10	PB1_10.wav	1	90.592619
150	2	F	20	0	NA	1	9	19	pre-test	bilabial	18	PB1	2	PB1_2.wav	0	69.753522
150	2	F	20	0	NA	1	9	19	pre-test	bilabial	19	PB1	7	PB1_7.wav	1	185.874032
150	2	F	20	0	NA	1	9	19	pre-test	bilabial	20	PB1	4	PB1_4.wav	0	118.743555
150	2	F	20	0	NA	1	9	19	pre-test	bilabial	21	PB1	12	PB1_12.wav	1	127.697737
150	2	F	20	0	NA	1	9	19	pre-test	bilabial	22	PB1	6	PB1_6.wav	0	768.006222
150	2	F	20	0	NA	1	9	19	pre-test	bilabial	23	PB1	11	PB1_11.wav	1	326.126714
150	2	F	20	0	NA	1	9	19	pre-test	bilabial	24	PB1	8	PB1_8.wav	1	822.748651
150	2	F	20	0	NA	1	9	19	pre-test	velar	25	KG2	7	KG2_7.wav	0	288.146271
150	2	F	20	0	NA	1	9	19	pre-test	velar	26	KG2	11	KG2_11.wav	1	208.947355
150	2	F	20	0	NA	1	9	19	pre-test	velar	27	KG2	8	KG2_8.wav	0	198.196735
150	2	F	20	0	NA	1	9	19	pre-test	velar	28	KG2	1	KG2_1.wav	0	66.31043
150	2	F	20	0	NA	1	9	19	pre-test	velar	29	KG2	4	KG2_4.wav	0	429.866118
150	2	F	20	0	NA	1	9	19	pre-test	velar	30	KG2	3	KG2_3.wav	0	153.784365
150	2	F	20	0	NA	1	9	19	pre-test	velar	31	KG2	10	KG2_10.wav	1	239.304865
150	2	F	20	0	NA	1	9	19	pre-test	velar	32	KG2	2	KG2_2.wav	0	137.881931
150	2	F	20	0	NA	1	9	19	pre-test	velar	33	KG2	9	KG2_9.wav	1	106.460758
150	2	F	20	0	NA	1	9	19	pre-test	velar	34	KG2	5	KG2_5.wav	0	48.277526
150	2	F	20	0	NA	1	9	19	pre-test	velar	35	KG2	6	KG2_6.wav	0	6.102423
150	2	F	20	0	NA	1	9	19	pre-test	velar	36	KG2	12	KG2_12.wav	1	34.451626
150	2	F	20	0	NA	1	9	19	pre-test	bilabial	37	PB2	8	PB2_8.wav	1	1017.752359
150	2	F	20	0	NA	1	9	19	pre-test	bilabial	38	PB2	12	PB2_12.wav	1	198.100461
150	2	F	20	0	NA	1	9	19	pre-test	bilabial	39	PB2	2	PB2_2.wav	0	98.763654
150	2	F	20	0	NA	1	9	19	pre-test	bilabial	40	PB2	6	PB2_6.wav	0	67.333909
150	2	F	20	0	NA	1	9	19	pre-test	bilabial	41	PB2	7	PB2_7.wav	0	421.285936
150	2	F	20	0	NA	1	9	19	pre-test	bilabial	42	PB2	4	PB2_4.wav	0	84.387634
150	2	F	20	0	NA	1	9	19	pre-test	bilabial	43	PB2	11	PB2_11.wav	1	106.263403
150	2	F	20	0	NA	1	9	19	pre-test	bilabial	44	PB2	5	PB2_5.wav	0	114.026602
150	2	F	20	0	NA	1	9	19	pre-test	bilabial	45	PB2	10	PB2_10.wav	1	186.292288
150	2	F	20	0	NA	1	9	19	pre-test	bilabial	46	PB2	1	PB2_1.wav	0	134.598927
150	2	F	20	0	NA	1	9	19	pre-test	bilabial	47	PB2	9	PB2_9.wav	1	37.598903
150	2	F	20	0	NA	1	9	19	pre-test	bilabial	48	PB2	3	PB2_3.wav	0	73.676743
150	2	F	20	0	NA	1	9	19	pre-test	velar	49	KG3	6	KG3_6.wav	0	647.751973
150	2	F	20	0	NA	1	9	19	pre-test	velar	50	KG3	9	KG3_9.wav	1	50.646075
150	2	F	20	0	NA	1	9	19	pre-test	velar	51	KG3	11	KG3_11.wav	1	45.272554
150	2	F	20	0	NA	1	9	19	pre-test	velar	52	KG3	8	KG3_8.wav	0	61.444227
150	2	F	20	0	NA	1	9	19	pre-test	velar	53	KG3	7	KG3_7.wav	0	40.186402
150	2	F	20	0	NA	1	9	19	pre-test	velar	54	KG3	12	KG3_12.wav	1	154.764419
150	2	F	20	0	NA	1	9	19	pre-test	velar	55	KG3	1	KG3_1.wav	0	30.69729
150	2	F	20	0	NA	1	9	19	pre-test	velar	56	KG3	5	KG3_5.wav	0	58.980244
150	2	F	20	0	NA	1	9	19	pre-test	velar	57	KG3	3	KG3_3.wav	0	66.283888
150	2	F	20	0	NA	1	9	19	pre-test	velar	58	KG3	2	KG3_2.wav	0	151.938088
150	2	F	20	0	NA	1	9	19	pre-test	velar	59	KG3	4	KG3_4.wav	0	79.453096
150	2	F	20	0	NA	1	9	19	pre-test	velar	60	KG3	10	KG3_10.wav	1	40.483486
150	2	F	20	0	NA	1	9	19	pre-test	bilabial	61	PB3	12	PB3_12.wav	1	715.88676
150	2	F	20	0	NA	1	9	19	pre-test	bilabial	62	PB3	1	PB3_1.wav	0	137.409986
150	2	F	20	0	NA	1	9	19	pre-test	bilabial	63	PB3	2	PB3_2.wav	0	82.124748
150	2	F	20	0	NA	1	9	19	pre-test	bilabial	64	PB3	7	PB3_7.wav	1	62.529472
150	2	F	20	0	NA	1	9	19	pre-test	bilabial	65	PB3	8	PB3_8.wav	1	65.804551
150	2	F	20	0	NA	1	9	19	pre-test	bilabial	66	PB3	11	PB3_11.wav	1	96.461866
150	2	F	20	0	NA	1	9	19	pre-test	bilabial	67	PB3	9	PB3_9.wav	1	68.020626
150	2	F	20	0	NA	1	9	19	pre-test	bilabial	68	PB3	10	PB3_10.wav	1	63.943139
150	2	F	20	0	NA	1	9	19	pre-test	bilabial	69	PB3	3	PB3_3.wav	0	61.981968
150	2	F	20	0	NA	1	9	19	pre-test	bilabial	70	PB3	6	PB3_6.wav	0	203.653127
150	2	F	20	0	NA	1	9	19	pre-test	bilabial	71	PB3	5	PB3_5.wav	0	122.815932
150	2	F	20	0	NA	1	9	19	pre-test	bilabial	72	PB3	4	PB3_4.wav	0	53.802051
150	2	F	20	0	NA	1	10	20	post-test	bilabial	1	PB4	4	PB4_4.wav	0	1482.607061
150	2	F	20	0	NA	1	10	20	post-test	bilabial	2	PB4	9	PB4_9.wav	1	157.628645
150	2	F	20	0	NA	1	10	20	post-test	bilabial	3	PB4	12	PB4_12.wav	1	85.886499
150	2	F	20	0	NA	1	10	20	post-test	bilabial	4	PB4	6	PB4_6.wav	0	83.363596
150	2	F	20	0	NA	1	10	20	post-test	bilabial	5	PB4	2	PB4_2.wav	0	102.747735
150	2	F	20	0	NA	1	10	20	post-test	bilabial	6	PB4	7	PB4_7.wav	1	234.875204
150	2	F	20	0	NA	1	10	20	post-test	bilabial	7	PB4	3	PB4_3.wav	0	88.6161
150	2	F	20	0	NA	1	10	20	post-test	bilabial	8	PB4	11	PB4_11.wav	1	260.045312
150	2	F	20	0	NA	1	10	20	post-test	bilabial	9	PB4	8	PB4_8.wav	1	146.384683
150	2	F	20	0	NA	1	10	20	post-test	bilabial	10	PB4	10	PB4_10.wav	1	140.900234
150	2	F	20	0	NA	1	10	20	post-test	bilabial	11	PB4	5	PB4_5.wav	0	20.244927
150	2	F	20	0	NA	1	10	20	post-test	bilabial	12	PB4	1	PB4_1.wav	0	45.474215
150	2	F	20	0	NA	1	10	20	post-test	velar	13	KG4	9	KG4_9.wav	1	399.272127
150	2	F	20	0	NA	1	10	20	post-test	velar	14	KG4	6	KG4_6.wav	0	90.717627
150	2	F	20	0	NA	1	10	20	post-test	velar	15	KG4	1	KG4_1.wav	0	12.658552
150	2	F	20	0	NA	1	10	20	post-test	velar	16	KG4	10	KG4_10.wav	1	40.754361
150	2	F	20	0	NA	1	10	20	post-test	velar	17	KG4	7	KG4_7.wav	0	124.243462
150	2	F	20	0	NA	1	10	20	post-test	velar	18	KG4	4	KG4_4.wav	0	35.86751
150	2	F	20	0	NA	1	10	20	post-test	velar	19	KG4	11	KG4_11.wav	1	47.48044
150	2	F	20	0	NA	1	10	20	post-test	velar	20	KG4	3	KG4_3.wav	0	115.308952
150	2	F	20	0	NA	1	10	20	post-test	velar	21	KG4	8	KG4_8.wav	0	273.639789
150	2	F	20	0	NA	1	10	20	post-test	velar	22	KG4	12	KG4_12.wav	1	339.97885
150	2	F	20	0	NA	1	10	20	post-test	velar	23	KG4	5	KG4_5.wav	0	123.827031
150	2	F	20	0	NA	1	10	20	post-test	velar	24	KG4	2	KG4_2.wav	0	123.267864
150	2	F	20	0	NA	1	10	20	post-test	bilabial	25	PB5	10	PB5_10.wav	1	357.002941
150	2	F	20	0	NA	1	10	20	post-test	bilabial	26	PB5	2	PB5_2.wav	0	191.681692
150	2	F	20	0	NA	1	10	20	post-test	bilabial	27	PB5	4	PB5_4.wav	0	118.980635
150	2	F	20	0	NA	1	10	20	post-test	bilabial	28	PB5	8	PB5_8.wav	1	115.018448
150	2	F	20	0	NA	1	10	20	post-test	bilabial	29	PB5	5	PB5_5.wav	0	62.39679
150	2	F	20	0	NA	1	10	20	post-test	bilabial	30	PB5	12	PB5_12.wav	1	65.785591
150	2	F	20	0	NA	1	10	20	post-test	bilabial	31	PB5	9	PB5_9.wav	1	39.737158
150	2	F	20	0	NA	1	10	20	post-test	bilabial	32	PB5	3	PB5_3.wav	0	55.471461
150	2	F	20	0	NA	1	10	20	post-test	bilabial	33	PB5	7	PB5_7.wav	1	68.96232
150	2	F	20	0	NA	1	10	20	post-test	bilabial	34	PB5	11	PB5_11.wav	1	81.613312
150	2	F	20	0	NA	1	10	20	post-test	bilabial	35	PB5	6	PB5_6.wav	0	166.663529
150	2	F	20	0	NA	1	10	20	post-test	bilabial	36	PB5	1	PB5_1.wav	0	64.031367
150	2	F	20	0	NA	1	10	20	post-test	velar	37	KG5	8	KG5_8.wav	1	293.58866
150	2	F	20	0	NA	1	10	20	post-test	velar	38	KG5	6	KG5_6.wav	0	26.512412
150	2	F	20	0	NA	1	10	20	post-test	velar	39	KG5	11	KG5_11.wav	1	571.616884
150	2	F	20	0	NA	1	10	20	post-test	velar	40	KG5	9	KG5_9.wav	1	62.324102
150	2	F	20	0	NA	1	10	20	post-test	velar	41	KG5	7	KG5_7.wav	0	366.598676
150	2	F	20	0	NA	1	10	20	post-test	velar	42	KG5	1	KG5_1.wav	0	17.349548
150	2	F	20	0	NA	1	10	20	post-test	velar	43	KG5	5	KG5_5.wav	0	120.519438
150	2	F	20	0	NA	1	10	20	post-test	velar	44	KG5	4	KG5_4.wav	0	71.70413
150	2	F	20	0	NA	1	10	20	post-test	velar	45	KG5	3	KG5_3.wav	0	86.812584
150	2	F	20	0	NA	1	10	20	post-test	velar	46	KG5	2	KG5_2.wav	0	107.034217
150	2	F	20	0	NA	1	10	20	post-test	velar	47	KG5	10	KG5_10.wav	1	730.51841
150	2	F	20	0	NA	1	10	20	post-test	velar	48	KG5	12	KG5_12.wav	1	12.443267
150	2	F	20	0	NA	1	10	20	post-test	bilabial	49	PB6	2	PB6_2.wav	0	273.848205
150	2	F	20	0	NA	1	10	20	post-test	bilabial	50	PB6	11	PB6_11.wav	1	205.971004
150	2	F	20	0	NA	1	10	20	post-test	bilabial	51	PB6	10	PB6_10.wav	1	124.299257
150	2	F	20	0	NA	1	10	20	post-test	bilabial	52	PB6	5	PB6_5.wav	0	70.610947
150	2	F	20	0	NA	1	10	20	post-test	bilabial	53	PB6	4	PB6_4.wav	0	86.897024
150	2	F	20	0	NA	1	10	20	post-test	bilabial	54	PB6	1	PB6_1.wav	0	86.954737
150	2	F	20	0	NA	1	10	20	post-test	bilabial	55	PB6	7	PB6_7.wav	1	362.867994
150	2	F	20	0	NA	1	10	20	post-test	bilabial	56	PB6	8	PB6_8.wav	1	219.610268
150	2	F	20	0	NA	1	10	20	post-test	bilabial	57	PB6	6	PB6_6.wav	0	106.1459
150	2	F	20	0	NA	1	10	20	post-test	bilabial	58	PB6	9	PB6_9.wav	1	89.908828
150	2	F	20	0	NA	1	10	20	post-test	bilabial	59	PB6	12	PB6_12.wav	1	85.301285
150	2	F	20	0	NA	1	10	20	post-test	bilabial	60	PB6	3	PB6_3.wav	0	130.329547
150	2	F	20	0	NA	1	10	20	post-test	velar	61	KG6	1	KG6_1.wav	0	190.733118
150	2	F	20	0	NA	1	10	20	post-test	velar	62	KG6	8	KG6_8.wav	1	47.186723
150	2	F	20	0	NA	1	10	20	post-test	velar	63	KG6	6	KG6_6.wav	0	33.975977
150	2	F	20	0	NA	1	10	20	post-test	velar	64	KG6	11	KG6_11.wav	1	64.738402
150	2	F	20	0	NA	1	10	20	post-test	velar	65	KG6	2	KG6_2.wav	0	18.906964
150	2	F	20	0	NA	1	10	20	post-test	velar	66	KG6	3	KG6_3.wav	0	14.135016
150	2	F	20	0	NA	1	10	20	post-test	velar	67	KG6	9	KG6_9.wav	1	38.430061
150	2	F	20	0	NA	1	10	20	post-test	velar	68	KG6	5	KG6_5.wav	0	422.809785
150	2	F	20	0	NA	1	10	20	post-test	velar	69	KG6	10	KG6_10.wav	1	144.437255
150	2	F	20	0	NA	1	10	20	post-test	velar	70	KG6	7	KG6_7.wav	0	84.932684
150	2	F	20	0	NA	1	10	20	post-test	velar	71	KG6	12	KG6_12.wav	1	121.510112
150	2	F	20	0	NA	1	10	20	post-test	velar	72	KG6	4	KG6_4.wav	0	73.823807
203	1	F	26	1	past	1	0	1	pre-test	velar	1	KG1	2	KG1_2.wav	0	4444.798271
203	1	F	26	1	past	1	0	1	pre-test	velar	2	KG1	5	KG1_5.wav	1	895.217564
203	1	F	26	1	past	1	0	1	pre-test	velar	3	KG1	4	KG1_4.wav	1	1104.984469
203	1	F	26	1	past	1	0	1	pre-test	velar	4	KG1	1	KG1_1.wav	0	572.059824
203	1	F	26	1	past	1	0	1	pre-test	velar	5	KG1	3	KG1_3.wav	0	656.452467
203	1	F	26	1	past	1	0	1	pre-test	velar	6	KG1	9	KG1_9.wav	1	432.487027
203	1	F	26	1	past	1	0	1	pre-test	velar	7	KG1	7	KG1_7.wav	1	347.605049
203	1	F	26	1	past	1	0	1	pre-test	velar	8	KG1	6	KG1_6.wav	1	288.984843
203	1	F	26	1	past	1	0	1	pre-test	velar	9	KG1	8	KG1_8.wav	1	239.6741
203	1	F	26	1	past	1	0	1	pre-test	velar	10	KG1	10	KG1_10.wav	1	223.430273
203	1	F	26	1	past	1	0	1	pre-test	velar	11	KG1	11	KG1_11.wav	1	262.330121
203	1	F	26	1	past	1	0	1	pre-test	velar	12	KG1	12	KG1_12.wav	1	256.419325
203	1	F	26	1	past	1	0	1	pre-test	bilabial	13	PB1	4	PB1_4.wav	0	897.257144
203	1	F	26	1	past	1	0	1	pre-test	bilabial	14	PB1	6	PB1_6.wav	1	291.485571
203	1	F	26	1	past	1	0	1	pre-test	bilabial	15	PB1	2	PB1_2.wav	0	227.096779
203	1	F	26	1	past	1	0	1	pre-test	bilabial	16	PB1	7	PB1_7.wav	1	244.16391
203	1	F	26	1	past	1	0	1	pre-test	bilabial	17	PB1	8	PB1_8.wav	1	540.881579
203	1	F	26	1	past	1	0	1	pre-test	bilabial	18	PB1	11	PB1_11.wav	1	384.752721
203	1	F	26	1	past	1	0	1	pre-test	bilabial	19	PB1	1	PB1_1.wav	0	239.097097
203	1	F	26	1	past	1	0	1	pre-test	bilabial	20	PB1	10	PB1_10.wav	1	220.498018
203	1	F	26	1	past	1	0	1	pre-test	bilabial	21	PB1	12	PB1_12.wav	1	267.506862
203	1	F	26	1	past	1	0	1	pre-test	bilabial	22	PB1	9	PB1_9.wav	1	242.471109
203	1	F	26	1	past	1	0	1	pre-test	bilabial	23	PB1	3	PB1_3.wav	0	244.750357
203	1	F	26	1	past	1	0	1	pre-test	bilabial	24	PB1	5	PB1_5.wav	0	405.1979
203	1	F	26	1	past	1	0	1	pre-test	velar	25	KG2	10	KG2_10.wav	1	597.752747
203	1	F	26	1	past	1	0	1	pre-test	velar	26	KG2	2	KG2_2.wav	0	251.536776
203	1	F	26	1	past	1	0	1	pre-test	velar	27	KG2	12	KG2_12.wav	1	231.721652
203	1	F	26	1	past	1	0	1	pre-test	velar	28	KG2	4	KG2_4.wav	0	251.561699
203	1	F	26	1	past	1	0	1	pre-test	velar	29	KG2	5	KG2_5.wav	0	275.883098
203	1	F	26	1	past	1	0	1	pre-test	velar	30	KG2	9	KG2_9.wav	1	232.218171
203	1	F	26	1	past	1	0	1	pre-test	velar	31	KG2	6	KG2_6.wav	1	265.047239
203	1	F	26	1	past	1	0	1	pre-test	velar	32	KG2	3	KG2_3.wav	0	234.621947
203	1	F	26	1	past	1	0	1	pre-test	velar	33	KG2	8	KG2_8.wav	1	257.335174
203	1	F	26	1	past	1	0	1	pre-test	velar	34	KG2	11	KG2_11.wav	1	135.225083
203	1	F	26	1	past	1	0	1	pre-test	velar	35	KG2	7	KG2_7.wav	1	238.552693
203	1	F	26	1	past	1	0	1	pre-test	velar	36	KG2	1	KG2_1.wav	0	536.475138
203	1	F	26	1	past	1	0	1	pre-test	bilabial	37	PB2	8	PB2_8.wav	1	438.202677
203	1	F	26	1	past	1	0	1	pre-test	bilabial	38	PB2	5	PB2_5.wav	1	260.035329
203	1	F	26	1	past	1	0	1	pre-test	bilabial	39	PB2	7	PB2_7.wav	1	200.332168
203	1	F	26	1	past	1	0	1	pre-test	bilabial	40	PB2	9	PB2_9.wav	1	209.002101
203	1	F	26	1	past	1	0	1	pre-test	bilabial	41	PB2	12	PB2_12.wav	1	176.54909
203	1	F	26	1	past	1	0	1	pre-test	bilabial	42	PB2	4	PB2_4.wav	0	240.060003
203	1	F	26	1	past	1	0	1	pre-test	bilabial	43	PB2	11	PB2_11.wav	1	240.507923
203	1	F	26	1	past	1	0	1	pre-test	bilabial	44	PB2	10	PB2_10.wav	1	663.300801
203	1	F	26	1	past	1	0	1	pre-test	bilabial	45	PB2	3	PB2_3.wav	0	275.323902
203	1	F	26	1	past	1	0	1	pre-test	bilabial	46	PB2	2	PB2_2.wav	0	217.670843
203	1	F	26	1	past	1	0	1	pre-test	bilabial	47	PB2	1	PB2_1.wav	0	210.744521
203	1	F	26	1	past	1	0	1	pre-test	bilabial	48	PB2	6	PB2_6.wav	1	1224.952837
203	1	F	26	1	past	1	0	1	pre-test	velar	49	KG3	6	KG3_6.wav	1	333.434052
203	1	F	26	1	past	1	0	1	pre-test	velar	50	KG3	4	KG3_4.wav	0	248.098691
203	1	F	26	1	past	1	0	1	pre-test	velar	51	KG3	1	KG3_1.wav	0	184.806025
203	1	F	26	1	past	1	0	1	pre-test	velar	52	KG3	9	KG3_9.wav	1	103.527317
203	1	F	26	1	past	1	0	1	pre-test	velar	53	KG3	2	KG3_2.wav	0	223.973861
203	1	F	26	1	past	1	0	1	pre-test	velar	54	KG3	10	KG3_10.wav	1	256.951006
203	1	F	26	1	past	1	0	1	pre-test	velar	55	KG3	12	KG3_12.wav	1	162.977433
203	1	F	26	1	past	1	0	1	pre-test	velar	56	KG3	3	KG3_3.wav	0	168.225022
203	1	F	26	1	past	1	0	1	pre-test	velar	57	KG3	8	KG3_8.wav	1	110.662062
203	1	F	26	1	past	1	0	1	pre-test	velar	58	KG3	11	KG3_11.wav	1	109.507471
203	1	F	26	1	past	1	0	1	pre-test	velar	59	KG3	5	KG3_5.wav	1	826.306794
203	1	F	26	1	past	1	0	1	pre-test	velar	60	KG3	7	KG3_7.wav	1	128.607419
203	1	F	26	1	past	1	0	1	pre-test	bilabial	61	PB3	5	PB3_5.wav	1	1059.489306
203	1	F	26	1	past	1	0	1	pre-test	bilabial	62	PB3	12	PB3_12.wav	1	260.523014
203	1	F	26	1	past	1	0	1	pre-test	bilabial	63	PB3	8	PB3_8.wav	1	224.40764
203	1	F	26	1	past	1	0	1	pre-test	bilabial	64	PB3	2	PB3_2.wav	0	220.171631
203	1	F	26	1	past	1	0	1	pre-test	bilabial	65	PB3	10	PB3_10.wav	1	251.654006
203	1	F	26	1	past	1	0	1	pre-test	bilabial	66	PB3	9	PB3_9.wav	1	241.360841
203	1	F	26	1	past	1	0	1	pre-test	bilabial	67	PB3	4	PB3_4.wav	0	213.213659
203	1	F	26	1	past	1	0	1	pre-test	bilabial	68	PB3	11	PB3_11.wav	1	211.485799
203	1	F	26	1	past	1	0	1	pre-test	bilabial	69	PB3	6	PB3_6.wav	1	344.616647
203	1	F	26	1	past	1	0	1	pre-test	bilabial	70	PB3	7	PB3_7.wav	1	176.730316
203	1	F	26	1	past	1	0	1	pre-test	bilabial	71	PB3	1	PB3_1.wav	0	219.713107
203	1	F	26	1	past	1	0	1	pre-test	bilabial	72	PB3	3	PB3_3.wav	0	194.730668
203	1	F	26	1	past	1	1	2	post-test	bilabial	1	PB4	7	PB4_7.wav	1	574.197575
203	1	F	26	1	past	1	1	2	post-test	bilabial	2	PB4	9	PB4_9.wav	1	232.378101
203	1	F	26	1	past	1	1	2	post-test	bilabial	3	PB4	1	PB4_1.wav	0	219.575064
203	1	F	26	1	past	1	1	2	post-test	bilabial	4	PB4	4	PB4_4.wav	0	387.498392
203	1	F	26	1	past	1	1	2	post-test	bilabial	5	PB4	3	PB4_3.wav	0	202.372797
203	1	F	26	1	past	1	1	2	post-test	bilabial	6	PB4	6	PB4_6.wav	1	213.029101
203	1	F	26	1	past	1	1	2	post-test	bilabial	7	PB4	10	PB4_10.wav	1	91.654434
203	1	F	26	1	past	1	1	2	post-test	bilabial	8	PB4	2	PB4_2.wav	0	146.042281
203	1	F	26	1	past	1	1	2	post-test	bilabial	9	PB4	12	PB4_12.wav	1	172.667475
203	1	F	26	1	past	1	1	2	post-test	bilabial	10	PB4	11	PB4_11.wav	1	146.977797
203	1	F	26	1	past	1	1	2	post-test	bilabial	11	PB4	8	PB4_8.wav	1	115.724964
203	1	F	26	1	past	1	1	2	post-test	bilabial	12	PB4	5	PB4_5.wav	1	813.452846
203	1	F	26	1	past	1	1	2	post-test	velar	13	KG4	6	KG4_6.wav	1	472.498408
203	1	F	26	1	past	1	1	2	post-test	velar	14	KG4	7	KG4_7.wav	1	213.550201
203	1	F	26	1	past	1	1	2	post-test	velar	15	KG4	2	KG4_2.wav	0	223.735221
203	1	F	26	1	past	1	1	2	post-test	velar	16	KG4	1	KG4_1.wav	0	181.278029
203	1	F	26	1	past	1	1	2	post-test	velar	17	KG4	5	KG4_5.wav	1	215.856397
203	1	F	26	1	past	1	1	2	post-test	velar	18	KG4	8	KG4_8.wav	1	86.07790001
203	1	F	26	1	past	1	1	2	post-test	velar	19	KG4	4	KG4_4.wav	1	142.224728
203	1	F	26	1	past	1	1	2	post-test	velar	20	KG4	3	KG4_3.wav	0	205.711007
203	1	F	26	1	past	1	1	2	post-test	velar	21	KG4	9	KG4_9.wav	1	211.699746
203	1	F	26	1	past	1	1	2	post-test	velar	22	KG4	10	KG4_10.wav	1	62.498706
203	1	F	26	1	past	1	1	2	post-test	velar	23	KG4	11	KG4_11.wav	1	124.915829
203	1	F	26	1	past	1	1	2	post-test	velar	24	KG4	12	KG4_12.wav	1	206.838371
203	1	F	26	1	past	1	1	2	post-test	bilabial	25	PB5	10	PB5_10.wav	1	631.201269
203	1	F	26	1	past	1	1	2	post-test	bilabial	26	PB5	2	PB5_2.wav	0	224.683748
203	1	F	26	1	past	1	1	2	post-test	bilabial	27	PB5	7	PB5_7.wav	1	307.898682
203	1	F	26	1	past	1	1	2	post-test	bilabial	28	PB5	5	PB5_5.wav	1	202.162196
203	1	F	26	1	past	1	1	2	post-test	bilabial	29	PB5	1	PB5_1.wav	0	135.748632
203	1	F	26	1	past	1	1	2	post-test	bilabial	30	PB5	12	PB5_12.wav	1	87.960701
203	1	F	26	1	past	1	1	2	post-test	bilabial	31	PB5	8	PB5_8.wav	1	52.53579401
203	1	F	26	1	past	1	1	2	post-test	bilabial	32	PB5	4	PB5_4.wav	0	131.900097
203	1	F	26	1	past	1	1	2	post-test	bilabial	33	PB5	9	PB5_9.wav	1	203.250978
203	1	F	26	1	past	1	1	2	post-test	bilabial	34	PB5	6	PB5_6.wav	1	133.918798
203	1	F	26	1	past	1	1	2	post-test	bilabial	35	PB5	11	PB5_11.wav	1	112.923726
203	1	F	26	1	past	1	1	2	post-test	bilabial	36	PB5	3	PB5_3.wav	0	285.119575
203	1	F	26	1	past	1	1	2	post-test	velar	37	KG5	11	KG5_11.wav	1	264.181056
203	1	F	26	1	past	1	1	2	post-test	velar	38	KG5	2	KG5_2.wav	0	259.014917
203	1	F	26	1	past	1	1	2	post-test	velar	39	KG5	7	KG5_7.wav	1	81.10527099
203	1	F	26	1	past	1	1	2	post-test	velar	40	KG5	8	KG5_8.wav	1	118.911372
203	1	F	26	1	past	1	1	2	post-test	velar	41	KG5	4	KG5_4.wav	0	117.074989
203	1	F	26	1	past	1	1	2	post-test	velar	42	KG5	12	KG5_12.wav	1	65.51234299
203	1	F	26	1	past	1	1	2	post-test	velar	43	KG5	3	KG5_3.wav	0	209.17974
203	1	F	26	1	past	1	1	2	post-test	velar	44	KG5	6	KG5_6.wav	1	288.390564
203	1	F	26	1	past	1	1	2	post-test	velar	45	KG5	5	KG5_5.wav	0	66.842297
203	1	F	26	1	past	1	1	2	post-test	velar	46	KG5	10	KG5_10.wav	1	60.33291301
203	1	F	26	1	past	1	1	2	post-test	velar	47	KG5	1	KG5_1.wav	0	58.713748
203	1	F	26	1	past	1	1	2	post-test	velar	48	KG5	9	KG5_9.wav	1	131.506324
203	1	F	26	1	past	1	1	2	post-test	bilabial	49	PB6	10	PB6_10.wav	1	438.289667
203	1	F	26	1	past	1	1	2	post-test	bilabial	50	PB6	2	PB6_2.wav	0	169.061448
203	1	F	26	1	past	1	1	2	post-test	bilabial	51	PB6	4	PB6_4.wav	0	482.685106
203	1	F	26	1	past	1	1	2	post-test	bilabial	52	PB6	6	PB6_6.wav	1	212.234342
203	1	F	26	1	past	1	1	2	post-test	bilabial	53	PB6	11	PB6_11.wav	1	84.185573
203	1	F	26	1	past	1	1	2	post-test	bilabial	54	PB6	3	PB6_3.wav	0	133.025759
203	1	F	26	1	past	1	1	2	post-test	bilabial	55	PB6	9	PB6_9.wav	1	203.9925
203	1	F	26	1	past	1	1	2	post-test	bilabial	56	PB6	1	PB6_1.wav	0	140.983895
203	1	F	26	1	past	1	1	2	post-test	bilabial	57	PB6	12	PB6_12.wav	1	132.371321
203	1	F	26	1	past	1	1	2	post-test	bilabial	58	PB6	5	PB6_5.wav	0	193.031438
203	1	F	26	1	past	1	1	2	post-test	bilabial	59	PB6	8	PB6_8.wav	1	60.609715
203	1	F	26	1	past	1	1	2	post-test	bilabial	60	PB6	7	PB6_7.wav	1	540.364101
203	1	F	26	1	past	1	1	2	post-test	velar	61	KG6	3	KG6_3.wav	0	348.341165
203	1	F	26	1	past	1	1	2	post-test	velar	62	KG6	10	KG6_10.wav	1	141.611106
203	1	F	26	1	past	1	1	2	post-test	velar	63	KG6	6	KG6_6.wav	1	9.708226004
203	1	F	26	1	past	1	1	2	post-test	velar	64	KG6	4	KG6_4.wav	0	140.676467
203	1	F	26	1	past	1	1	2	post-test	velar	65	KG6	1	KG6_1.wav	0	226.044849
203	1	F	26	1	past	1	1	2	post-test	velar	66	KG6	5	KG6_5.wav	0	332.594893
203	1	F	26	1	past	1	1	2	post-test	velar	67	KG6	11	KG6_11.wav	1	201.024046
203	1	F	26	1	past	1	1	2	post-test	velar	68	KG6	9	KG6_9.wav	1	44.076558
203	1	F	26	1	past	1	1	2	post-test	velar	69	KG6	12	KG6_12.wav	1	132.968335
203	1	F	26	1	past	1	1	2	post-test	velar	70	KG6	2	KG6_2.wav	0	168.87845
203	1	F	26	1	past	1	1	2	post-test	velar	71	KG6	8	KG6_8.wav	1	217.755604
203	1	F	26	1	past	1	1	2	post-test	velar	72	KG6	7	KG6_7.wav	1	213.083295
203	1	F	26	1	past	1	1	3	pre-test	velar	1	KG1	12	KG1_12.wav	1	609.901511
203	1	F	26	1	past	1	1	3	pre-test	velar	2	KG1	5	KG1_5.wav	1	473.433083
203	1	F	26	1	past	1	1	3	pre-test	velar	3	KG1	6	KG1_6.wav	1	256.954483
203	1	F	26	1	past	1	1	3	pre-test	velar	4	KG1	10	KG1_10.wav	1	118.371601
203	1	F	26	1	past	1	1	3	pre-test	velar	5	KG1	8	KG1_8.wav	1	100.168919
203	1	F	26	1	past	1	1	3	pre-test	velar	6	KG1	9	KG1_9.wav	1	116.301624
203	1	F	26	1	past	1	1	3	pre-test	velar	7	KG1	11	KG1_11.wav	1	122.692651
203	1	F	26	1	past	1	1	3	pre-test	velar	8	KG1	1	KG1_1.wav	0	90.653425
203	1	F	26	1	past	1	1	3	pre-test	velar	9	KG1	4	KG1_4.wav	0	242.189483
203	1	F	26	1	past	1	1	3	pre-test	velar	10	KG1	2	KG1_2.wav	0	208.914633
203	1	F	26	1	past	1	1	3	pre-test	velar	11	KG1	7	KG1_7.wav	1	459.814919
203	1	F	26	1	past	1	1	3	pre-test	velar	12	KG1	3	KG1_3.wav	0	217.364038
203	1	F	26	1	past	1	1	3	pre-test	bilabial	13	PB1	3	PB1_3.wav	0	382.903328
203	1	F	26	1	past	1	1	3	pre-test	bilabial	14	PB1	10	PB1_10.wav	1	260.505716
203	1	F	26	1	past	1	1	3	pre-test	bilabial	15	PB1	11	PB1_11.wav	1	108.257122
203	1	F	26	1	past	1	1	3	pre-test	bilabial	16	PB1	1	PB1_1.wav	0	277.868677
203	1	F	26	1	past	1	1	3	pre-test	bilabial	17	PB1	7	PB1_7.wav	1	292.644661
203	1	F	26	1	past	1	1	3	pre-test	bilabial	18	PB1	6	PB1_6.wav	1	187.760666
203	1	F	26	1	past	1	1	3	pre-test	bilabial	19	PB1	2	PB1_2.wav	0	150.208009
203	1	F	26	1	past	1	1	3	pre-test	bilabial	20	PB1	9	PB1_9.wav	1	205.627915
203	1	F	26	1	past	1	1	3	pre-test	bilabial	21	PB1	8	PB1_8.wav	1	212.67585
203	1	F	26	1	past	1	1	3	pre-test	bilabial	22	PB1	12	PB1_12.wav	1	98.703311
203	1	F	26	1	past	1	1	3	pre-test	bilabial	23	PB1	5	PB1_5.wav	1	892.35476
203	1	F	26	1	past	1	1	3	pre-test	bilabial	24	PB1	4	PB1_4.wav	0	265.746885
203	1	F	26	1	past	1	1	3	pre-test	velar	25	KG2	1	KG2_1.wav	0	356.826749
203	1	F	26	1	past	1	1	3	pre-test	velar	26	KG2	10	KG2_10.wav	1	229.401004
203	1	F	26	1	past	1	1	3	pre-test	velar	27	KG2	4	KG2_4.wav	0	262.846834
203	1	F	26	1	past	1	1	3	pre-test	velar	28	KG2	8	KG2_8.wav	1	224.591354
203	1	F	26	1	past	1	1	3	pre-test	velar	29	KG2	5	KG2_5.wav	1	1347.062263
203	1	F	26	1	past	1	1	3	pre-test	velar	30	KG2	12	KG2_12.wav	1	87.99822
203	1	F	26	1	past	1	1	3	pre-test	velar	31	KG2	2	KG2_2.wav	0	150.668373
203	1	F	26	1	past	1	1	3	pre-test	velar	32	KG2	9	KG2_9.wav	1	199.794489
203	1	F	26	1	past	1	1	3	pre-test	velar	33	KG2	3	KG2_3.wav	0	56.92098601
203	1	F	26	1	past	1	1	3	pre-test	velar	34	KG2	7	KG2_7.wav	1	110.327718
203	1	F	26	1	past	1	1	3	pre-test	velar	35	KG2	6	KG2_6.wav	1	481.612303
203	1	F	26	1	past	1	1	3	pre-test	velar	36	KG2	11	KG2_11.wav	1	198.853041
203	1	F	26	1	past	1	1	3	pre-test	bilabial	37	PB2	12	PB2_12.wav	1	399.213947
203	1	F	26	1	past	1	1	3	pre-test	bilabial	38	PB2	9	PB2_9.wav	1	98.016478
203	1	F	26	1	past	1	1	3	pre-test	bilabial	39	PB2	7	PB2_7.wav	1	1185.544183
203	1	F	26	1	past	1	1	3	pre-test	bilabial	40	PB2	10	PB2_10.wav	1	200.824802
203	1	F	26	1	past	1	1	3	pre-test	bilabial	41	PB2	1	PB2_1.wav	0	246.231046
203	1	F	26	1	past	1	1	3	pre-test	bilabial	42	PB2	8	PB2_8.wav	1	332.276566
203	1	F	26	1	past	1	1	3	pre-test	bilabial	43	PB2	11	PB2_11.wav	1	135.055592
203	1	F	26	1	past	1	1	3	pre-test	bilabial	44	PB2	2	PB2_2.wav	0	72.740177
203	1	F	26	1	past	1	1	3	pre-test	bilabial	45	PB2	5	PB2_5.wav	0	568.494066
203	1	F	26	1	past	1	1	3	pre-test	bilabial	46	PB2	4	PB2_4.wav	0	225.635936
203	1	F	26	1	past	1	1	3	pre-test	bilabial	47	PB2	6	PB2_6.wav	1	1101.720421
203	1	F	26	1	past	1	1	3	pre-test	bilabial	48	PB2	3	PB2_3.wav	0	199.636507
203	1	F	26	1	past	1	1	3	pre-test	velar	49	KG3	10	KG3_10.wav	1	249.979296
203	1	F	26	1	past	1	1	3	pre-test	velar	50	KG3	8	KG3_8.wav	1	70.36594801
203	1	F	26	1	past	1	1	3	pre-test	velar	51	KG3	9	KG3_9.wav	1	22.08270201
203	1	F	26	1	past	1	1	3	pre-test	velar	52	KG3	1	KG3_1.wav	0	214.026769
203	1	F	26	1	past	1	1	3	pre-test	velar	53	KG3	3	KG3_3.wav	0	190.521425
203	1	F	26	1	past	1	1	3	pre-test	velar	54	KG3	4	KG3_4.wav	0	114.194605
203	1	F	26	1	past	1	1	3	pre-test	velar	55	KG3	6	KG3_6.wav	1	462.847161
203	1	F	26	1	past	1	1	3	pre-test	velar	56	KG3	5	KG3_5.wav	0	515.277655
203	1	F	26	1	past	1	1	3	pre-test	velar	57	KG3	2	KG3_2.wav	0	230.342767
203	1	F	26	1	past	1	1	3	pre-test	velar	58	KG3	11	KG3_11.wav	1	110.746431
203	1	F	26	1	past	1	1	3	pre-test	velar	59	KG3	12	KG3_12.wav	1	68.371382
203	1	F	26	1	past	1	1	3	pre-test	velar	60	KG3	7	KG3_7.wav	1	205.71591
203	1	F	26	1	past	1	1	3	pre-test	bilabial	61	PB3	2	PB3_2.wav	0	393.975066
203	1	F	26	1	past	1	1	3	pre-test	bilabial	62	PB3	12	PB3_12.wav	1	243.532509
203	1	F	26	1	past	1	1	3	pre-test	bilabial	63	PB3	6	PB3_6.wav	1	594.984014
203	1	F	26	1	past	1	1	3	pre-test	bilabial	64	PB3	8	PB3_8.wav	1	186.453083
203	1	F	26	1	past	1	1	3	pre-test	bilabial	65	PB3	4	PB3_4.wav	0	259.999924
203	1	F	26	1	past	1	1	3	pre-test	bilabial	66	PB3	11	PB3_11.wav	1	131.882669
203	1	F	26	1	past	1	1	3	pre-test	bilabial	67	PB3	5	PB3_5.wav	1	471.282046
203	1	F	26	1	past	1	1	3	pre-test	bilabial	68	PB3	7	PB3_7.wav	1	273.155205
203	1	F	26	1	past	1	1	3	pre-test	bilabial	69	PB3	1	PB3_1.wav	0	226.143487
203	1	F	26	1	past	1	1	3	pre-test	bilabial	70	PB3	3	PB3_3.wav	0	100.777553
203	1	F	26	1	past	1	1	3	pre-test	bilabial	71	PB3	10	PB3_10.wav	1	279.64521
203	1	F	26	1	past	1	1	3	pre-test	bilabial	72	PB3	9	PB3_9.wav	1	154.961132
203	1	F	26	1	past	1	2	4	post-test	bilabial	1	PB4	1	PB4_1.wav	0	722.543235
203	1	F	26	1	past	1	2	4	post-test	bilabial	2	PB4	8	PB4_8.wav	1	251.79755
203	1	F	26	1	past	1	2	4	post-test	bilabial	3	PB4	7	PB4_7.wav	1	338.385148
203	1	F	26	1	past	1	2	4	post-test	bilabial	4	PB4	6	PB4_6.wav	1	197.867737
203	1	F	26	1	past	1	2	4	post-test	bilabial	5	PB4	12	PB4_12.wav	1	233.978016
203	1	F	26	1	past	1	2	4	post-test	bilabial	6	PB4	11	PB4_11.wav	1	91.162563
203	1	F	26	1	past	1	2	4	post-test	bilabial	7	PB4	5	PB4_5.wav	1	288.789633
203	1	F	26	1	past	1	2	4	post-test	bilabial	8	PB4	2	PB4_2.wav	0	236.004263
203	1	F	26	1	past	1	2	4	post-test	bilabial	9	PB4	3	PB4_3.wav	0	236.624439
203	1	F	26	1	past	1	2	4	post-test	bilabial	10	PB4	10	PB4_10.wav	1	433.714485
203	1	F	26	1	past	1	2	4	post-test	bilabial	11	PB4	9	PB4_9.wav	1	163.97001
203	1	F	26	1	past	1	2	4	post-test	bilabial	12	PB4	4	PB4_4.wav	0	224.855237
203	1	F	26	1	past	1	2	4	post-test	velar	13	KG4	4	KG4_4.wav	1	989.549512
203	1	F	26	1	past	1	2	4	post-test	velar	14	KG4	11	KG4_11.wav	1	227.511359
203	1	F	26	1	past	1	2	4	post-test	velar	15	KG4	5	KG4_5.wav	1	326.59092
203	1	F	26	1	past	1	2	4	post-test	velar	16	KG4	6	KG4_6.wav	1	147.519168
203	1	F	26	1	past	1	2	4	post-test	velar	17	KG4	7	KG4_7.wav	1	14.72831401
203	1	F	26	1	past	1	2	4	post-test	velar	18	KG4	12	KG4_12.wav	1	82.11967201
203	1	F	26	1	past	1	2	4	post-test	velar	19	KG4	10	KG4_10.wav	1	28.983581
203	1	F	26	1	past	1	2	4	post-test	velar	20	KG4	9	KG4_9.wav	1	857.915972
203	1	F	26	1	past	1	2	4	post-test	velar	21	KG4	8	KG4_8.wav	1	245.08739
203	1	F	26	1	past	1	2	4	post-test	velar	22	KG4	3	KG4_3.wav	0	190.159133
203	1	F	26	1	past	1	2	4	post-test	velar	23	KG4	1	KG4_1.wav	0	188.86003
203	1	F	26	1	past	1	2	4	post-test	velar	24	KG4	2	KG4_2.wav	0	52.45379801
203	1	F	26	1	past	1	2	4	post-test	bilabial	25	PB5	2	PB5_2.wav	0	500.245176
203	1	F	26	1	past	1	2	4	post-test	bilabial	26	PB5	5	PB5_5.wav	0	567.64954
203	1	F	26	1	past	1	2	4	post-test	bilabial	27	PB5	10	PB5_10.wav	1	71.13453599
203	1	F	26	1	past	1	2	4	post-test	bilabial	28	PB5	4	PB5_4.wav	0	301.473642
203	1	F	26	1	past	1	2	4	post-test	bilabial	29	PB5	11	PB5_11.wav	1	220.229214
203	1	F	26	1	past	1	2	4	post-test	bilabial	30	PB5	1	PB5_1.wav	0	160.698041
203	1	F	26	1	past	1	2	4	post-test	bilabial	31	PB5	9	PB5_9.wav	1	177.558464
203	1	F	26	1	past	1	2	4	post-test	bilabial	32	PB5	12	PB5_12.wav	1	117.871614
203	1	F	26	1	past	1	2	4	post-test	bilabial	33	PB5	8	PB5_8.wav	1	118.979741
203	1	F	26	1	past	1	2	4	post-test	bilabial	34	PB5	7	PB5_7.wav	1	104.812188
203	1	F	26	1	past	1	2	4	post-test	bilabial	35	PB5	6	PB5_6.wav	1	118.011655
203	1	F	26	1	past	1	2	4	post-test	bilabial	36	PB5	3	PB5_3.wav	0	238.483235
203	1	F	26	1	past	1	2	4	post-test	velar	37	KG5	9	KG5_9.wav	1	223.262464
203	1	F	26	1	past	1	2	4	post-test	velar	38	KG5	6	KG5_6.wav	1	190.434754
203	1	F	26	1	past	1	2	4	post-test	velar	39	KG5	3	KG5_3.wav	0	110.032511
203	1	F	26	1	past	1	2	4	post-test	velar	40	KG5	4	KG5_4.wav	0	100.276477
203	1	F	26	1	past	1	2	4	post-test	velar	41	KG5	8	KG5_8.wav	1	71.833293
203	1	F	26	1	past	1	2	4	post-test	velar	42	KG5	7	KG5_7.wav	1	4.715880001
203	1	F	26	1	past	1	2	4	post-test	velar	43	KG5	11	KG5_11.wav	1	61.22882399
203	1	F	26	1	past	1	2	4	post-test	velar	44	KG5	1	KG5_1.wav	0	65.620622
203	1	F	26	1	past	1	2	4	post-test	velar	45	KG5	12	KG5_12.wav	1	216.317813
203	1	F	26	1	past	1	2	4	post-test	velar	46	KG5	10	KG5_10.wav	1	60.72122
203	1	F	26	1	past	1	2	4	post-test	velar	47	KG5	2	KG5_2.wav	0	47.30638801
203	1	F	26	1	past	1	2	4	post-test	velar	48	KG5	5	KG5_5.wav	0	92.817026
203	1	F	26	1	past	1	2	4	post-test	bilabial	49	PB6	3	PB6_3.wav	0	247.376088
203	1	F	26	1	past	1	2	4	post-test	bilabial	50	PB6	5	PB6_5.wav	0	183.983472
203	1	F	26	1	past	1	2	4	post-test	bilabial	51	PB6	10	PB6_10.wav	1	26.33959899
203	1	F	26	1	past	1	2	4	post-test	bilabial	52	PB6	6	PB6_6.wav	1	267.362306
203	1	F	26	1	past	1	2	4	post-test	bilabial	53	PB6	8	PB6_8.wav	1	170.11357
203	1	F	26	1	past	1	2	4	post-test	bilabial	54	PB6	9	PB6_9.wav	1	57.524816
203	1	F	26	1	past	1	2	4	post-test	bilabial	55	PB6	4	PB6_4.wav	1	806.971375
203	1	F	26	1	past	1	2	4	post-test	bilabial	56	PB6	7	PB6_7.wav	1	234.913101
203	1	F	26	1	past	1	2	4	post-test	bilabial	57	PB6	2	PB6_2.wav	0	115.296356
203	1	F	26	1	past	1	2	4	post-test	bilabial	58	PB6	1	PB6_1.wav	0	162.137449
203	1	F	26	1	past	1	2	4	post-test	bilabial	59	PB6	11	PB6_11.wav	1	222.094857
203	1	F	26	1	past	1	2	4	post-test	bilabial	60	PB6	12	PB6_12.wav	1	166.686841
203	1	F	26	1	past	1	2	4	post-test	velar	61	KG6	1	KG6_1.wav	0	310.134529
203	1	F	26	1	past	1	2	4	post-test	velar	62	KG6	5	KG6_5.wav	0	126.028033
203	1	F	26	1	past	1	2	4	post-test	velar	63	KG6	3	KG6_3.wav	0	128.991468
203	1	F	26	1	past	1	2	4	post-test	velar	64	KG6	6	KG6_6.wav	1	405.156166
203	1	F	26	1	past	1	2	4	post-test	velar	65	KG6	10	KG6_10.wav	1	83.51801401
203	1	F	26	1	past	1	2	4	post-test	velar	66	KG6	7	KG6_7.wav	1	84.95597901
203	1	F	26	1	past	1	2	4	post-test	velar	67	KG6	8	KG6_8.wav	1	221.588004
203	1	F	26	1	past	1	2	4	post-test	velar	68	KG6	2	KG6_2.wav	0	143.520341
203	1	F	26	1	past	1	2	4	post-test	velar	69	KG6	9	KG6_9.wav	1	398.403299
203	1	F	26	1	past	1	2	4	post-test	velar	70	KG6	4	KG6_4.wav	0	210.051905
203	1	F	26	1	past	1	2	4	post-test	velar	71	KG6	12	KG6_12.wav	1	62.94162001
203	1	F	26	1	past	1	2	4	post-test	velar	72	KG6	11	KG6_11.wav	1	72.43359199
203	1	F	26	1	past	1	2	5	pre-test	velar	1	KG1	7	KG1_7.wav	1	615.433969
203	1	F	26	1	past	1	2	5	pre-test	velar	2	KG1	4	KG1_4.wav	1	277.714855
203	1	F	26	1	past	1	2	5	pre-test	velar	3	KG1	8	KG1_8.wav	1	66.426998
203	1	F	26	1	past	1	2	5	pre-test	velar	4	KG1	10	KG1_10.wav	1	128.643344
203	1	F	26	1	past	1	2	5	pre-test	velar	5	KG1	1	KG1_1.wav	0	81.098929
203	1	F	26	1	past	1	2	5	pre-test	velar	6	KG1	12	KG1_12.wav	1	144.826154
203	1	F	26	1	past	1	2	5	pre-test	velar	7	KG1	6	KG1_6.wav	1	129.382203
203	1	F	26	1	past	1	2	5	pre-test	velar	8	KG1	3	KG1_3.wav	0	170.224132
203	1	F	26	1	past	1	2	5	pre-test	velar	9	KG1	2	KG1_2.wav	0	194.720885
203	1	F	26	1	past	1	2	5	pre-test	velar	10	KG1	5	KG1_5.wav	1	564.297988
203	1	F	26	1	past	1	2	5	pre-test	velar	11	KG1	9	KG1_9.wav	1	218.818639
203	1	F	26	1	past	1	2	5	pre-test	velar	12	KG1	11	KG1_11.wav	1	193.679504
203	1	F	26	1	past	1	2	5	pre-test	bilabial	13	PB1	2	PB1_2.wav	0	383.131509
203	1	F	26	1	past	1	2	5	pre-test	bilabial	14	PB1	3	PB1_3.wav	0	43.856119
203	1	F	26	1	past	1	2	5	pre-test	bilabial	15	PB1	10	PB1_10.wav	1	232.214707
203	1	F	26	1	past	1	2	5	pre-test	bilabial	16	PB1	11	PB1_11.wav	1	53.779886
203	1	F	26	1	past	1	2	5	pre-test	bilabial	17	PB1	5	PB1_5.wav	1	345.239995
203	1	F	26	1	past	1	2	5	pre-test	bilabial	18	PB1	12	PB1_12.wav	1	182.941811
203	1	F	26	1	past	1	2	5	pre-test	bilabial	19	PB1	1	PB1_1.wav	0	30.585657
203	1	F	26	1	past	1	2	5	pre-test	bilabial	20	PB1	9	PB1_9.wav	1	138.482168
203	1	F	26	1	past	1	2	5	pre-test	bilabial	21	PB1	6	PB1_6.wav	1	93.937694
203	1	F	26	1	past	1	2	5	pre-test	bilabial	22	PB1	8	PB1_8.wav	1	60.096268
203	1	F	26	1	past	1	2	5	pre-test	bilabial	23	PB1	7	PB1_7.wav	1	47.89254
203	1	F	26	1	past	1	2	5	pre-test	bilabial	24	PB1	4	PB1_4.wav	0	114.144349
203	1	F	26	1	past	1	2	5	pre-test	velar	25	KG2	11	KG2_11.wav	1	249.460149
203	1	F	26	1	past	1	2	5	pre-test	velar	26	KG2	3	KG2_3.wav	0	148.130316
203	1	F	26	1	past	1	2	5	pre-test	velar	27	KG2	9	KG2_9.wav	1	73.630476
203	1	F	26	1	past	1	2	5	pre-test	velar	28	KG2	5	KG2_5.wav	0	221.647872
203	1	F	26	1	past	1	2	5	pre-test	velar	29	KG2	6	KG2_6.wav	1	73.992949
203	1	F	26	1	past	1	2	5	pre-test	velar	30	KG2	7	KG2_7.wav	1	20.02493
203	1	F	26	1	past	1	2	5	pre-test	velar	31	KG2	8	KG2_8.wav	1	88.586403
203	1	F	26	1	past	1	2	5	pre-test	velar	32	KG2	12	KG2_12.wav	1	76.128333
203	1	F	26	1	past	1	2	5	pre-test	velar	33	KG2	1	KG2_1.wav	0	113.92256
203	1	F	26	1	past	1	2	5	pre-test	velar	34	KG2	4	KG2_4.wav	0	92.96232
203	1	F	26	1	past	1	2	5	pre-test	velar	35	KG2	10	KG2_10.wav	1	4.876880004
203	1	F	26	1	past	1	2	5	pre-test	velar	36	KG2	2	KG2_2.wav	0	65.177518
203	1	F	26	1	past	1	2	5	pre-test	bilabial	37	PB2	4	PB2_4.wav	0	249.781695
203	1	F	26	1	past	1	2	5	pre-test	bilabial	38	PB2	9	PB2_9.wav	1	156.508838
203	1	F	26	1	past	1	2	5	pre-test	bilabial	39	PB2	11	PB2_11.wav	1	34.15905
203	1	F	26	1	past	1	2	5	pre-test	bilabial	40	PB2	8	PB2_8.wav	1	132.835523
203	1	F	26	1	past	1	2	5	pre-test	bilabial	41	PB2	12	PB2_12.wav	1	116.150177
203	1	F	26	1	past	1	2	5	pre-test	bilabial	42	PB2	1	PB2_1.wav	0	67.933313
203	1	F	26	1	past	1	2	5	pre-test	bilabial	43	PB2	5	PB2_5.wav	1	357.642881
203	1	F	26	1	past	1	2	5	pre-test	bilabial	44	PB2	3	PB2_3.wav	0	107.362194
203	1	F	26	1	past	1	2	5	pre-test	bilabial	45	PB2	6	PB2_6.wav	1	400.19219
203	1	F	26	1	past	1	2	5	pre-test	bilabial	46	PB2	7	PB2_7.wav	1	56.803639
203	1	F	26	1	past	1	2	5	pre-test	bilabial	47	PB2	2	PB2_2.wav	0	92.621321
203	1	F	26	1	past	1	2	5	pre-test	bilabial	48	PB2	10	PB2_10.wav	1	77.246361
203	1	F	26	1	past	1	2	5	pre-test	velar	49	KG3	9	KG3_9.wav	1	339.663002
203	1	F	26	1	past	1	2	5	pre-test	velar	50	KG3	10	KG3_10.wav	1	99.003554
203	1	F	26	1	past	1	2	5	pre-test	velar	51	KG3	11	KG3_11.wav	1	82.954332
203	1	F	26	1	past	1	2	5	pre-test	velar	52	KG3	4	KG3_4.wav	0	243.067757
203	1	F	26	1	past	1	2	5	pre-test	velar	53	KG3	7	KG3_7.wav	1	109.196953
203	1	F	26	1	past	1	2	5	pre-test	velar	54	KG3	5	KG3_5.wav	1	502.394498
203	1	F	26	1	past	1	2	5	pre-test	velar	55	KG3	2	KG3_2.wav	0	125.348631
203	1	F	26	1	past	1	2	5	pre-test	velar	56	KG3	8	KG3_8.wav	1	36.110181
203	1	F	26	1	past	1	2	5	pre-test	velar	57	KG3	3	KG3_3.wav	0	56.693153
203	1	F	26	1	past	1	2	5	pre-test	velar	58	KG3	6	KG3_6.wav	1	329.637575
203	1	F	26	1	past	1	2	5	pre-test	velar	59	KG3	12	KG3_12.wav	1	86.31823101
203	1	F	26	1	past	1	2	5	pre-test	velar	60	KG3	1	KG3_1.wav	0	112.551253
203	1	F	26	1	past	1	2	5	pre-test	bilabial	61	PB3	11	PB3_11.wav	1	192.346175
203	1	F	26	1	past	1	2	5	pre-test	bilabial	62	PB3	4	PB3_4.wav	0	81.042866
203	1	F	26	1	past	1	2	5	pre-test	bilabial	63	PB3	12	PB3_12.wav	1	175.535676
203	1	F	26	1	past	1	2	5	pre-test	bilabial	64	PB3	1	PB3_1.wav	0	125.632056
203	1	F	26	1	past	1	2	5	pre-test	bilabial	65	PB3	7	PB3_7.wav	1	169.534191
203	1	F	26	1	past	1	2	5	pre-test	bilabial	66	PB3	6	PB3_6.wav	1	122.012541
203	1	F	26	1	past	1	2	5	pre-test	bilabial	67	PB3	5	PB3_5.wav	1	691.751709
203	1	F	26	1	past	1	2	5	pre-test	bilabial	68	PB3	3	PB3_3.wav	0	169.727342
203	1	F	26	1	past	1	2	5	pre-test	bilabial	69	PB3	8	PB3_8.wav	1	83.584773
203	1	F	26	1	past	1	2	5	pre-test	bilabial	70	PB3	2	PB3_2.wav	0	86.413516
203	1	F	26	1	past	1	2	5	pre-test	bilabial	71	PB3	10	PB3_10.wav	1	131.839857
203	1	F	26	1	past	1	2	5	pre-test	bilabial	72	PB3	9	PB3_9.wav	1	87.18631
203	1	F	26	1	past	1	3	6	post-test	bilabial	1	PB4	7	PB4_7.wav	1	453.316569
203	1	F	26	1	past	1	3	6	post-test	bilabial	2	PB4	3	PB4_3.wav	1	346.773633
203	1	F	26	1	past	1	3	6	post-test	bilabial	3	PB4	12	PB4_12.wav	1	74.073692
203	1	F	26	1	past	1	3	6	post-test	bilabial	4	PB4	10	PB4_10.wav	1	113.077452
203	1	F	26	1	past	1	3	6	post-test	bilabial	5	PB4	4	PB4_4.wav	1	50.316667
203	1	F	26	1	past	1	3	6	post-test	bilabial	6	PB4	8	PB4_8.wav	1	128.991868
203	1	F	26	1	past	1	3	6	post-test	bilabial	7	PB4	11	PB4_11.wav	1	112.610445
203	1	F	26	1	past	1	3	6	post-test	bilabial	8	PB4	6	PB4_6.wav	1	125.00388
203	1	F	26	1	past	1	3	6	post-test	bilabial	9	PB4	5	PB4_5.wav	1	232.10155
203	1	F	26	1	past	1	3	6	post-test	bilabial	10	PB4	9	PB4_9.wav	1	108.48548
203	1	F	26	1	past	1	3	6	post-test	bilabial	11	PB4	2	PB4_2.wav	0	56.804147
203	1	F	26	1	past	1	3	6	post-test	bilabial	12	PB4	1	PB4_1.wav	0	26.445411
203	1	F	26	1	past	1	3	6	post-test	velar	13	KG4	8	KG4_8.wav	1	280.762715
203	1	F	26	1	past	1	3	6	post-test	velar	14	KG4	7	KG4_7.wav	1	158.693002
203	1	F	26	1	past	1	3	6	post-test	velar	15	KG4	12	KG4_12.wav	1	769.190575
203	1	F	26	1	past	1	3	6	post-test	velar	16	KG4	5	KG4_5.wav	0	245.986014
203	1	F	26	1	past	1	3	6	post-test	velar	17	KG4	2	KG4_2.wav	0	897.64279
203	1	F	26	1	past	1	3	6	post-test	velar	18	KG4	10	KG4_10.wav	1	344.426968
203	1	F	26	1	past	1	3	6	post-test	velar	19	KG4	3	KG4_3.wav	0	474.341854
203	1	F	26	1	past	1	3	6	post-test	velar	20	KG4	1	KG4_1.wav	0	155.281406
203	1	F	26	1	past	1	3	6	post-test	velar	21	KG4	6	KG4_6.wav	1	338.20365
203	1	F	26	1	past	1	3	6	post-test	velar	22	KG4	9	KG4_9.wav	1	194.614441
203	1	F	26	1	past	1	3	6	post-test	velar	23	KG4	11	KG4_11.wav	1	183.413469
203	1	F	26	1	past	1	3	6	post-test	velar	24	KG4	4	KG4_4.wav	0	196.098602
203	1	F	26	1	past	1	3	6	post-test	bilabial	25	PB5	7	PB5_7.wav	1	585.305453
203	1	F	26	1	past	1	3	6	post-test	bilabial	26	PB5	3	PB5_3.wav	0	731.806831
203	1	F	26	1	past	1	3	6	post-test	bilabial	27	PB5	9	PB5_9.wav	1	116.913456
203	1	F	26	1	past	1	3	6	post-test	bilabial	28	PB5	1	PB5_1.wav	0	135.959845
203	1	F	26	1	past	1	3	6	post-test	bilabial	29	PB5	8	PB5_8.wav	1	515.278696
203	1	F	26	1	past	1	3	6	post-test	bilabial	30	PB5	12	PB5_12.wav	1	148.811988
203	1	F	26	1	past	1	3	6	post-test	bilabial	31	PB5	11	PB5_11.wav	1	64.39717201
203	1	F	26	1	past	1	3	6	post-test	bilabial	32	PB5	6	PB5_6.wav	1	612.156846
203	1	F	26	1	past	1	3	6	post-test	bilabial	33	PB5	5	PB5_5.wav	1	402.712089
203	1	F	26	1	past	1	3	6	post-test	bilabial	34	PB5	4	PB5_4.wav	1	642.761132
203	1	F	26	1	past	1	3	6	post-test	bilabial	35	PB5	10	PB5_10.wav	1	129.427361
203	1	F	26	1	past	1	3	6	post-test	bilabial	36	PB5	2	PB5_2.wav	0	228.406596
203	1	F	26	1	past	1	3	6	post-test	velar	37	KG5	9	KG5_9.wav	1	219.704736
203	1	F	26	1	past	1	3	6	post-test	velar	38	KG5	6	KG5_6.wav	1	194.406415
203	1	F	26	1	past	1	3	6	post-test	velar	39	KG5	3	KG5_3.wav	0	101.492007
203	1	F	26	1	past	1	3	6	post-test	velar	40	KG5	4	KG5_4.wav	0	139.080659
203	1	F	26	1	past	1	3	6	post-test	velar	41	KG5	12	KG5_12.wav	1	93.424689
203	1	F	26	1	past	1	3	6	post-test	velar	42	KG5	5	KG5_5.wav	0	131.837283
203	1	F	26	1	past	1	3	6	post-test	velar	43	KG5	11	KG5_11.wav	1	57.4534
203	1	F	26	1	past	1	3	6	post-test	velar	44	KG5	10	KG5_10.wav	1	159.449149
203	1	F	26	1	past	1	3	6	post-test	velar	45	KG5	7	KG5_7.wav	1	179.811771
203	1	F	26	1	past	1	3	6	post-test	velar	46	KG5	1	KG5_1.wav	0	71.17317501
203	1	F	26	1	past	1	3	6	post-test	velar	47	KG5	8	KG5_8.wav	1	140.648331
203	1	F	26	1	past	1	3	6	post-test	velar	48	KG5	2	KG5_2.wav	0	161.373318
203	1	F	26	1	past	1	3	6	post-test	bilabial	49	PB6	1	PB6_1.wav	0	298.020834
203	1	F	26	1	past	1	3	6	post-test	bilabial	50	PB6	8	PB6_8.wav	1	219.196096
203	1	F	26	1	past	1	3	6	post-test	bilabial	51	PB6	4	PB6_4.wav	1	259.2745
203	1	F	26	1	past	1	3	6	post-test	bilabial	52	PB6	3	PB6_3.wav	0	182.175961
203	1	F	26	1	past	1	3	6	post-test	bilabial	53	PB6	9	PB6_9.wav	1	245.478043
203	1	F	26	1	past	1	3	6	post-test	bilabial	54	PB6	10	PB6_10.wav	1	187.176737
203	1	F	26	1	past	1	3	6	post-test	bilabial	55	PB6	5	PB6_5.wav	1	234.559436
203	1	F	26	1	past	1	3	6	post-test	bilabial	56	PB6	11	PB6_11.wav	1	149.138206
203	1	F	26	1	past	1	3	6	post-test	bilabial	57	PB6	6	PB6_6.wav	1	191.464807
203	1	F	26	1	past	1	3	6	post-test	bilabial	58	PB6	7	PB6_7.wav	1	223.302807
203	1	F	26	1	past	1	3	6	post-test	bilabial	59	PB6	2	PB6_2.wav	0	211.86403
203	1	F	26	1	past	1	3	6	post-test	bilabial	60	PB6	12	PB6_12.wav	1	219.842732
203	1	F	26	1	past	1	3	6	post-test	velar	61	KG6	11	KG6_11.wav	1	202.976225
203	1	F	26	1	past	1	3	6	post-test	velar	62	KG6	4	KG6_4.wav	0	152.432237
203	1	F	26	1	past	1	3	6	post-test	velar	63	KG6	2	KG6_2.wav	0	186.569149
203	1	F	26	1	past	1	3	6	post-test	velar	64	KG6	3	KG6_3.wav	0	151.873437
203	1	F	26	1	past	1	3	6	post-test	velar	65	KG6	6	KG6_6.wav	1	474.78946
203	1	F	26	1	past	1	3	6	post-test	velar	66	KG6	7	KG6_7.wav	1	212.051715
203	1	F	26	1	past	1	3	6	post-test	velar	67	KG6	1	KG6_1.wav	0	86.768637
203	1	F	26	1	past	1	3	6	post-test	velar	68	KG6	9	KG6_9.wav	1	91.740628
203	1	F	26	1	past	1	3	6	post-test	velar	69	KG6	10	KG6_10.wav	1	107.122231
203	1	F	26	1	past	1	3	6	post-test	velar	70	KG6	12	KG6_12.wav	1	112.55496
203	1	F	26	1	past	1	3	6	post-test	velar	71	KG6	8	KG6_8.wav	1	76.419074
203	1	F	26	1	past	1	3	6	post-test	velar	72	KG6	5	KG6_5.wav	0	187.901217
203	1	F	26	1	past	1	3	7	pre-test	velar	1	KG1	10	KG1_10.wav	1	520.948317
203	1	F	26	1	past	1	3	7	pre-test	velar	2	KG1	7	KG1_7.wav	1	167.490672
203	1	F	26	1	past	1	3	7	pre-test	velar	3	KG1	11	KG1_11.wav	1	144.768587
203	1	F	26	1	past	1	3	7	pre-test	velar	4	KG1	1	KG1_1.wav	0	228.110045
203	1	F	26	1	past	1	3	7	pre-test	velar	5	KG1	9	KG1_9.wav	1	159.138989
203	1	F	26	1	past	1	3	7	pre-test	velar	6	KG1	3	KG1_3.wav	0	570.773254
203	1	F	26	1	past	1	3	7	pre-test	velar	7	KG1	8	KG1_8.wav	1	159.944989
203	1	F	26	1	past	1	3	7	pre-test	velar	8	KG1	6	KG1_6.wav	1	57.01152701
203	1	F	26	1	past	1	3	7	pre-test	velar	9	KG1	4	KG1_4.wav	1	387.475418
203	1	F	26	1	past	1	3	7	pre-test	velar	10	KG1	12	KG1_12.wav	1	600.840999
203	1	F	26	1	past	1	3	7	pre-test	velar	11	KG1	5	KG1_5.wav	1	267.091959
203	1	F	26	1	past	1	3	7	pre-test	velar	12	KG1	2	KG1_2.wav	0	79.20416699
203	1	F	26	1	past	1	3	7	pre-test	bilabial	13	PB1	1	PB1_1.wav	0	286.858199
203	1	F	26	1	past	1	3	7	pre-test	bilabial	14	PB1	12	PB1_12.wav	1	202.03675
203	1	F	26	1	past	1	3	7	pre-test	bilabial	15	PB1	6	PB1_6.wav	1	445.983548
203	1	F	26	1	past	1	3	7	pre-test	bilabial	16	PB1	8	PB1_8.wav	1	179.592099
203	1	F	26	1	past	1	3	7	pre-test	bilabial	17	PB1	10	PB1_10.wav	1	75.24462501
203	1	F	26	1	past	1	3	7	pre-test	bilabial	18	PB1	9	PB1_9.wav	1	188.368628
203	1	F	26	1	past	1	3	7	pre-test	bilabial	19	PB1	3	PB1_3.wav	0	146.522585
203	1	F	26	1	past	1	3	7	pre-test	bilabial	20	PB1	7	PB1_7.wav	1	157.09192
203	1	F	26	1	past	1	3	7	pre-test	bilabial	21	PB1	2	PB1_2.wav	0	173.496291
203	1	F	26	1	past	1	3	7	pre-test	bilabial	22	PB1	4	PB1_4.wav	0	277.392919
203	1	F	26	1	past	1	3	7	pre-test	bilabial	23	PB1	5	PB1_5.wav	1	500.116405
203	1	F	26	1	past	1	3	7	pre-test	bilabial	24	PB1	11	PB1_11.wav	1	111.901718
203	1	F	26	1	past	1	3	7	pre-test	velar	25	KG2	10	KG2_10.wav	1	244.111591
203	1	F	26	1	past	1	3	7	pre-test	velar	26	KG2	3	KG2_3.wav	0	57.61351099
203	1	F	26	1	past	1	3	7	pre-test	velar	27	KG2	6	KG2_6.wav	1	237.232344
203	1	F	26	1	past	1	3	7	pre-test	velar	28	KG2	11	KG2_11.wav	1	73.105916
203	1	F	26	1	past	1	3	7	pre-test	velar	29	KG2	7	KG2_7.wav	1	35.45380701
203	1	F	26	1	past	1	3	7	pre-test	velar	30	KG2	8	KG2_8.wav	1	105.541645
203	1	F	26	1	past	1	3	7	pre-test	velar	31	KG2	9	KG2_9.wav	1	120.879073
203	1	F	26	1	past	1	3	7	pre-test	velar	32	KG2	2	KG2_2.wav	0	585.416531
203	1	F	26	1	past	1	3	7	pre-test	velar	33	KG2	5	KG2_5.wav	0	380.945657
203	1	F	26	1	past	1	3	7	pre-test	velar	34	KG2	4	KG2_4.wav	0	283.738957
203	1	F	26	1	past	1	3	7	pre-test	velar	35	KG2	1	KG2_1.wav	0	140.774603
203	1	F	26	1	past	1	3	7	pre-test	velar	36	KG2	12	KG2_12.wav	1	246.638525
203	1	F	26	1	past	1	3	7	pre-test	bilabial	37	PB2	7	PB2_7.wav	0	199.862986
203	1	F	26	1	past	1	3	7	pre-test	bilabial	38	PB2	6	PB2_6.wav	1	242.177215
203	1	F	26	1	past	1	3	7	pre-test	bilabial	39	PB2	10	PB2_10.wav	1	160.800758
203	1	F	26	1	past	1	3	7	pre-test	bilabial	40	PB2	1	PB2_1.wav	0	251.789553
203	1	F	26	1	past	1	3	7	pre-test	bilabial	41	PB2	5	PB2_5.wav	0	227.078927
203	1	F	26	1	past	1	3	7	pre-test	bilabial	42	PB2	4	PB2_4.wav	0	113.200612
203	1	F	26	1	past	1	3	7	pre-test	bilabial	43	PB2	3	PB2_3.wav	0	84.41311499
203	1	F	26	1	past	1	3	7	pre-test	bilabial	44	PB2	12	PB2_12.wav	1	128.024942
203	1	F	26	1	past	1	3	7	pre-test	bilabial	45	PB2	11	PB2_11.wav	1	105.308199
203	1	F	26	1	past	1	3	7	pre-test	bilabial	46	PB2	2	PB2_2.wav	0	114.078378
203	1	F	26	1	past	1	3	7	pre-test	bilabial	47	PB2	8	PB2_8.wav	1	119.253318
203	1	F	26	1	past	1	3	7	pre-test	bilabial	48	PB2	9	PB2_9.wav	1	240.517523
203	1	F	26	1	past	1	3	7	pre-test	velar	49	KG3	8	KG3_8.wav	1	301.218906
203	1	F	26	1	past	1	3	7	pre-test	velar	50	KG3	1	KG3_1.wav	0	104.440607
203	1	F	26	1	past	1	3	7	pre-test	velar	51	KG3	12	KG3_12.wav	1	365.761189
203	1	F	26	1	past	1	3	7	pre-test	velar	52	KG3	10	KG3_10.wav	1	115.161199
203	1	F	26	1	past	1	3	7	pre-test	velar	53	KG3	7	KG3_7.wav	1	6.297057
203	1	F	26	1	past	1	3	7	pre-test	velar	54	KG3	3	KG3_3.wav	0	116.856689
203	1	F	26	1	past	1	3	7	pre-test	velar	55	KG3	6	KG3_6.wav	0	70.331657
203	1	F	26	1	past	1	3	7	pre-test	velar	56	KG3	5	KG3_5.wav	0	123.056419
203	1	F	26	1	past	1	3	7	pre-test	velar	57	KG3	9	KG3_9.wav	1	1142.19363
203	1	F	26	1	past	1	3	7	pre-test	velar	58	KG3	11	KG3_11.wav	1	155.214214
203	1	F	26	1	past	1	3	7	pre-test	velar	59	KG3	4	KG3_4.wav	0	99.411324
203	1	F	26	1	past	1	3	7	pre-test	velar	60	KG3	2	KG3_2.wav	0	2.625929992
203	1	F	26	1	past	1	3	7	pre-test	bilabial	61	PB3	12	PB3_12.wav	1	266.452519
203	1	F	26	1	past	1	3	7	pre-test	bilabial	62	PB3	7	PB3_7.wav	1	153.676118
203	1	F	26	1	past	1	3	7	pre-test	bilabial	63	PB3	4	PB3_4.wav	0	69.69406799
203	1	F	26	1	past	1	3	7	pre-test	bilabial	64	PB3	8	PB3_8.wav	1	236.007242
203	1	F	26	1	past	1	3	7	pre-test	bilabial	65	PB3	11	PB3_11.wav	1	162.231527
203	1	F	26	1	past	1	3	7	pre-test	bilabial	66	PB3	9	PB3_9.wav	1	114.189248
203	1	F	26	1	past	1	3	7	pre-test	bilabial	67	PB3	5	PB3_5.wav	0	124.898386
203	1	F	26	1	past	1	3	7	pre-test	bilabial	68	PB3	3	PB3_3.wav	0	171.839509
203	1	F	26	1	past	1	3	7	pre-test	bilabial	69	PB3	1	PB3_1.wav	0	122.92456
203	1	F	26	1	past	1	3	7	pre-test	bilabial	70	PB3	2	PB3_2.wav	0	69.375094
203	1	F	26	1	past	1	3	7	pre-test	bilabial	71	PB3	6	PB3_6.wav	0	138.345762
203	1	F	26	1	past	1	3	7	pre-test	bilabial	72	PB3	10	PB3_10.wav	1	386.453405
203	1	F	26	1	past	1	4	8	post-test	bilabial	1	PB4	2	PB4_2.wav	0	593.19581
203	1	F	26	1	past	1	4	8	post-test	bilabial	2	PB4	5	PB4_5.wav	1	115.068442
203	1	F	26	1	past	1	4	8	post-test	bilabial	3	PB4	10	PB4_10.wav	1	197.829783
203	1	F	26	1	past	1	4	8	post-test	bilabial	4	PB4	12	PB4_12.wav	1	24.832746
203	1	F	26	1	past	1	4	8	post-test	bilabial	5	PB4	11	PB4_11.wav	1	56.885927
203	1	F	26	1	past	1	4	8	post-test	bilabial	6	PB4	8	PB4_8.wav	1	33.121556
203	1	F	26	1	past	1	4	8	post-test	bilabial	7	PB4	1	PB4_1.wav	0	130.944858
203	1	F	26	1	past	1	4	8	post-test	bilabial	8	PB4	9	PB4_9.wav	1	162.087716
203	1	F	26	1	past	1	4	8	post-test	bilabial	9	PB4	7	PB4_7.wav	1	87.21273499
203	1	F	26	1	past	1	4	8	post-test	bilabial	10	PB4	4	PB4_4.wav	1	284.959075
203	1	F	26	1	past	1	4	8	post-test	bilabial	11	PB4	3	PB4_3.wav	0	16.95530899
203	1	F	26	1	past	1	4	8	post-test	bilabial	12	PB4	6	PB4_6.wav	1	70.01655099
203	1	F	26	1	past	1	4	8	post-test	velar	13	KG4	7	KG4_7.wav	1	322.16106
203	1	F	26	1	past	1	4	8	post-test	velar	14	KG4	5	KG4_5.wav	1	163.984017
203	1	F	26	1	past	1	4	8	post-test	velar	15	KG4	11	KG4_11.wav	1	2312.099556
203	1	F	26	1	past	1	4	8	post-test	velar	16	KG4	6	KG4_6.wav	1	254.841009
203	1	F	26	1	past	1	4	8	post-test	velar	17	KG4	1	KG4_1.wav	0	72.660865
203	1	F	26	1	past	1	4	8	post-test	velar	18	KG4	4	KG4_4.wav	0	96.04506599
203	1	F	26	1	past	1	4	8	post-test	velar	19	KG4	2	KG4_2.wav	0	108.078202
203	1	F	26	1	past	1	4	8	post-test	velar	20	KG4	10	KG4_10.wav	1	75.663654
203	1	F	26	1	past	1	4	8	post-test	velar	21	KG4	12	KG4_12.wav	1	2341.021282
203	1	F	26	1	past	1	4	8	post-test	velar	22	KG4	9	KG4_9.wav	1	94.975885
203	1	F	26	1	past	1	4	8	post-test	velar	23	KG4	3	KG4_3.wav	0	72.07095801
203	1	F	26	1	past	1	4	8	post-test	velar	24	KG4	8	KG4_8.wav	1	64.392338
203	1	F	26	1	past	1	4	8	post-test	bilabial	25	PB5	4	PB5_4.wav	0	912.692793
203	1	F	26	1	past	1	4	8	post-test	bilabial	26	PB5	6	PB5_6.wav	0	1015.56967
203	1	F	26	1	past	1	4	8	post-test	bilabial	27	PB5	1	PB5_1.wav	0	249.01844
203	1	F	26	1	past	1	4	8	post-test	bilabial	28	PB5	9	PB5_9.wav	1	248.396698
203	1	F	26	1	past	1	4	8	post-test	bilabial	29	PB5	3	PB5_3.wav	0	180.604825
203	1	F	26	1	past	1	4	8	post-test	bilabial	30	PB5	5	PB5_5.wav	1	403.284315
203	1	F	26	1	past	1	4	8	post-test	bilabial	31	PB5	10	PB5_10.wav	1	139.229781
203	1	F	26	1	past	1	4	8	post-test	bilabial	32	PB5	11	PB5_11.wav	1	197.150256
203	1	F	26	1	past	1	4	8	post-test	bilabial	33	PB5	7	PB5_7.wav	1	174.342587
203	1	F	26	1	past	1	4	8	post-test	bilabial	34	PB5	2	PB5_2.wav	0	61.707168
203	1	F	26	1	past	1	4	8	post-test	bilabial	35	PB5	8	PB5_8.wav	1	231.607892
203	1	F	26	1	past	1	4	8	post-test	bilabial	36	PB5	12	PB5_12.wav	1	57.55402199
203	1	F	26	1	past	1	4	8	post-test	velar	37	KG5	7	KG5_7.wav	1	229.025429
203	1	F	26	1	past	1	4	8	post-test	velar	38	KG5	5	KG5_5.wav	0	8.822042
203	1	F	26	1	past	1	4	8	post-test	velar	39	KG5	11	KG5_11.wav	1	1846.377487
203	1	F	26	1	past	1	4	8	post-test	velar	40	KG5	6	KG5_6.wav	1	98.00111399
203	1	F	26	1	past	1	4	8	post-test	velar	41	KG5	2	KG5_2.wav	0	2064.806393
203	1	F	26	1	past	1	4	8	post-test	velar	42	KG5	4	KG5_4.wav	0	211.628972
203	1	F	26	1	past	1	4	8	post-test	velar	43	KG5	9	KG5_9.wav	1	119.547403
203	1	F	26	1	past	1	4	8	post-test	velar	44	KG5	12	KG5_12.wav	1	240.979081
203	1	F	26	1	past	1	4	8	post-test	velar	45	KG5	1	KG5_1.wav	0	124.399494
203	1	F	26	1	past	1	4	8	post-test	velar	46	KG5	8	KG5_8.wav	1	140.592885
203	1	F	26	1	past	1	4	8	post-test	velar	47	KG5	10	KG5_10.wav	1	188.016493
203	1	F	26	1	past	1	4	8	post-test	velar	48	KG5	3	KG5_3.wav	0	79.94071201
203	1	F	26	1	past	1	4	8	post-test	bilabial	49	PB6	8	PB6_8.wav	1	256.026731
203	1	F	26	1	past	1	4	8	post-test	bilabial	50	PB6	7	PB6_7.wav	1	234.099314
203	1	F	26	1	past	1	4	8	post-test	bilabial	51	PB6	1	PB6_1.wav	0	152.875723
203	1	F	26	1	past	1	4	8	post-test	bilabial	52	PB6	12	PB6_12.wav	1	322.525514
203	1	F	26	1	past	1	4	8	post-test	bilabial	53	PB6	6	PB6_6.wav	1	206.922842
203	1	F	26	1	past	1	4	8	post-test	bilabial	54	PB6	5	PB6_5.wav	1	144.176996
203	1	F	26	1	past	1	4	8	post-test	bilabial	55	PB6	4	PB6_4.wav	1	228.090661
[truncated: 72,881 more rows]
