# Supplementary material
Source: MDPI journal article supplement (https://www.mdpi.com/2226-471X/8/1/78)
Supplement: s1 [file s1 › ExploringOnsetOfDrift_Tagalog_wordlists.pdf]

# Exploring the Onset of Phonetic Drift in Perception

Tagalog word lists

Dataset in Open Science Framework (OSF) [url-redacted-for-review]

This document presents the Tagalog word lists used for recording by the speakers in the project *Exploring the Onset of Phonetic Drift in Voice Onset Time Perception*. The separate word lists are explained as follows:

1. List One provides a base set of plosive-initial Tagalog lexical items, with bilabial and alveolar stops appearing before each of the five vowels of Tagalog.
2. List Two provides a set of minimally contrasting corresponding words with List One which differ in initial voicing. In some cases these minimal contrasts are with a nonce word, as indicated by a dash for the English translation.
3. List Three provides a set of words with primarily sonorant consonants, as well as /s/ and /h/, for the brief exposure interlude used in the experiment between the L1 pre-task and the exposure task.

The minimal contrasts of Lists One and Two were explained to the Tagalog speakers to remove confusion regarding the nonce words, and to clarify that their pronunciation should be the same as the corresponding lexical items, with only a difference in initial voicing.

No explicit instruction was provided as to how to read the lists, but both Tagalog speakers read one page at a time, or the first column of List One, and then the first column of List Two, followed by the second column of List One, and then the second column of List Two, before finishing by reading List Three.

While List Three was recorded once, Lists One and Two were recorded multiple times by each speaker, to obtain a sufficient number of Tagalog tokens (180 unique tokens for each of the 10 exposure tasks).

Pronounce each of the following words **four times**, with **happy**, then **angry**, then **sad**, then **neutral** emotion.

| LIST ONE |                         |
|----------|-------------------------|
| Tagalog  | English translation     |
| pino     | ‘fine’                  |
| pili     | ‘elect’                 |
| pisi     | ‘string’                |
| pera     | ‘money’                 |
| perang   | ‘cash-LK <sup>1</sup> ’ |
| peras    | ‘pear’                  |
| pamuno   | ‘leadership’            |
| pala     | ‘shovel’                |
| paso     | ‘burnt’                 |
| pula     | ‘red’                   |
| puri     | ‘honor’                 |
| puso     | ‘heart’                 |
| polo     | ‘polo shirt’            |
| po       | ‘sir’                   |
| poso     | ‘well’                  |
| bilao    | ‘basket’                |
| binali   | ‘break’                 |
| bisa     | ‘power’                 |
| belo     | ‘veil’                  |
| berila   | ‘beryl’                 |
| beses    | ‘times’                 |
| bana     | ‘husband’               |
| balang   | ‘locust’                |
| basa     | ‘reading’               |
| buli     | ‘polish’                |
| bumara   | ‘obstruct’              |

| LIST TWO |                     |
|----------|---------------------|
| Tagalog  | English translation |
| bino     | ‘wine’              |
| bili     | ‘price’             |
| bisi     | ‘drought’           |
| bera     | —                   |
| berang   | —                   |
| beras    | —                   |
| bamuno   | —                   |
| bala     | ‘bullet’            |
| baso     | ‘glass’             |
| bula     | ‘bubbles’           |
| buri     | —                   |
| buso     | ‘diver’             |
| bolo     | ‘sword/knife’       |
| bo       | —                   |
| boso     | ‘voyeurism’         |
| pilao    | —                   |
| pinali   | —                   |
| pisa     | ‘crushed’           |
| pelo     | —                   |
| perila   | —                   |
| peses    | —                   |
| pana     | ‘bow+arrow’         |
| palang   | ‘large knife’       |
| pasa     | ‘to pass’           |
| puli     | —                   |
| pumara   | ‘stop’              |

<sup>1</sup> LK = linker morpheme, which is the <-ng> here.

| LIST ONE |             |
|----------|-------------|
| busina   | ‘car horn’  |
| bono     | ‘bond’      |
| bola     | ‘ball’      |
| bores    | ‘voice’     |
| tina     | ‘dye’       |
| tilay    | ‘scald’     |
| tisa     | ‘chalk’     |
| tela     | ‘cloth’     |
| tenga    | ‘ear’       |
| tesoro   | ‘treasure’  |
| tama     | ‘correct’   |
| tali     | ‘string’    |
| taras    | ‘boldness’  |
| tumanga  | ‘stare’     |
| tula     | ‘poem’      |
| tuso     | ‘cunning’   |
| toyo     | ‘soy sauce’ |
| tore     | ‘tower’     |
| tomo     | ‘tome’      |
| dili     | ‘seldom’    |
| dini     | ‘here’      |
| dingas   | ‘flame’     |
| demonyo  | ‘demon’     |
| deliryo  | ‘delirium’  |
| desenso  | ‘demotion’  |
| damo     | ‘grass’     |
| daya     | ‘fraud’     |

| LIST TWO |                                                                                        |
|----------|----------------------------------------------------------------------------------------|
| pusina   | —                                                                                      |
| pono     | —                                                                                      |
| pola     | —                                                                                      |
| poses    | —                                                                                      |
| dina     | contraction of <i>hindi na</i> (‘not anymore’)                                         |
| dilay    | —                                                                                      |
| disa     | —                                                                                      |
| dela     | common first part of Filipino last name with Spanish origin (e.g., <i>dela Torre</i> ) |
| denga    | —                                                                                      |
| desoro   | —                                                                                      |
| dama     | ‘checkers’                                                                             |
| dali     | ‘quickness’                                                                            |
| daras    | ‘adze (axe)’                                                                           |
| dumanga  | —                                                                                      |
| dula     | ‘stage play’                                                                           |
| duso     | —                                                                                      |
| doyo     | —                                                                                      |
| dore     | —                                                                                      |
| domo     | —                                                                                      |
| tili     | ‘shriek’                                                                               |
| tini     | —                                                                                      |
| tingas   | —                                                                                      |
| temonyo  | —                                                                                      |
| teliryo  | —                                                                                      |
| tesenso  | —                                                                                      |
| tamo     | contraction of <i>nakita mo</i> (‘see?’)                                               |
| taya     | ‘estimate’                                                                             |

| <b>LIST ONE</b> |         |
|-----------------|---------|
| dasa            | ‘breed’ |
| dura            | ‘spit’  |
| dulo            | ‘end’   |
| dusa            | ‘grief’ |
| donador         | ‘donor’ |
| doon            | ‘there’ |
| dosena          | ‘dozen’ |

| <b>LIST TWO</b> |         |
|-----------------|---------|
| tasa            | ‘cup’   |
| tura            | —       |
| tulo            | ‘drip’  |
| tusa            | —       |
| tonador         | —       |
| toon            | ‘focus’ |
| tosena          | —       |

Pronounce each of the following words **once**, without emotion.

| <b>LIST 3</b>  |                            |
|----------------|----------------------------|
| <b>Tagalog</b> | <b>English translation</b> |
| nga            | ‘indeed’                   |
| ngalan         | ‘name’                     |
| ngani          | ‘please’                   |
| ngawa          | ‘prattle’                  |
| ngilo          | ‘tooth pain’               |
| ngisi          | ‘grin’                     |
| ngiwi          | ‘wry’                      |
| ngongo         | ‘nasal speech’             |
| ngunguya       | ‘chew’                     |
| ngumuso        | ‘pout’                     |
| nguso          | ‘snout’                    |
| nguni          | ‘but’                      |
| ngayon         | ‘now’                      |
| ngayaw         | ‘refuse’                   |
| nganga         | ‘chewing betel’            |
| ngamay         | ‘numbness’                 |
| ngalo          | ‘fatigue’                  |
| ngumiya        | ‘meow’                     |
| ramo           | ‘boar’                     |
| raso           | ‘silk’                     |
| riyan          | ‘in that place’            |
| rolyo          | ‘roll’                     |
| runong         | ‘intelligent’              |
| laho           | ‘eclipse’                  |
| lalang         | ‘creation’                 |
| laywan         | ‘honeybee’                 |
| lia            | ‘pond algae’               |
| linlangin      | ‘deceive’                  |

| <b>LIST 3</b> |                   |
|---------------|-------------------|
| lisya         | ‘incorrect’       |
| liyo          | ‘dizzy’           |
| lola          | ‘grandmother’     |
| lunasan       | ‘cure’            |
| lungangi      | ‘with head bent’  |
| luyloy        | ‘loose flesh’     |
| yano          | ‘plain’           |
| yangasngas    | ‘teeth on edge’   |
| yayain        | ‘invite’          |
| yero          | ‘iron sheet’      |
| yumao         | ‘pass away’       |
| yasyasin      | ‘scrape off’      |
| wani          | ‘help’            |
| walang        | ‘unfurnished’     |
| walawala      | ‘distract’        |
| wangis        | ‘similitude’      |
| wilihin       | ‘make interested’ |
| angal         | ‘long crying’     |
| anim          | ‘six’             |
| alalay        | ‘helpful friend’  |
| awa           | ‘mercy’           |
| asin          | ‘salt’            |
| ianas         | ‘whisper’         |
| ihiwalay      | ‘set apart’       |
| ingay         | ‘sound’           |
| iyangyang     | ‘dry in the air’  |
| ilalawaran    | ‘describe’        |
| ulang         | ‘lobster’         |
| umalon        | ‘form waves’      |
| umuwi         | ‘return home’     |
| unsiyami      | ‘growth stunted’  |
| ungos         | ‘upper lip’       |
